# Supplementary material for: Functionalization of α-hydroxyphosphonates as a convenient route toN-tosyl-α-aminophosphonates
Source: Royal Society of Chemistry journal article supplement (doi:10.1039/c8ra01656a), 2018-01-01
Supplement: c8ra01656a1.pdf [file c8ra01656a1.pdf]

## Supporting Information

### Functionalization of $\alpha$ -hydroxyphosphonates as a convenient route to *N*-tosyl- $\alpha$ -aminophosphonates

Tomasz Cytlak,<sup>\*,a,b</sup> Monika Skibińska,<sup>a</sup> Patrycja Kaczmarek,<sup>a</sup> Marcin Kaźmierczak,<sup>a,b</sup>  
Magdalena Rapp,<sup>a</sup> Maciej Kubicki<sup>a</sup> and Henryk Koroniak<sup>a</sup>

<sup>a</sup> Faculty of Chemistry, Adam Mickiewicz University in Poznań, Umultowska 89b, 61-614 Poznań, Poland.

<sup>b</sup> Centre for Advanced Technologies, Adam Mickiewicz University in Poznań, Umultowska 89c, 61-614 Poznań, Poland

E-mail: cytlak@amu.edu.pl

#### Table of Contents

|                                                                                          |     |
|------------------------------------------------------------------------------------------|-----|
| 1. <sup>1</sup> H, <sup>13</sup> C, <sup>31</sup> P and 2D NMR Spectra of Compounds..... | S2  |
| 2. Crystallographic Data.....                                                            | S55 |

# 1. $^1\text{H}$ , $^{13}\text{C}$ , $^{19}\text{F}$ , $^{31}\text{P}$ and 2D NMR Spectra of Compounds

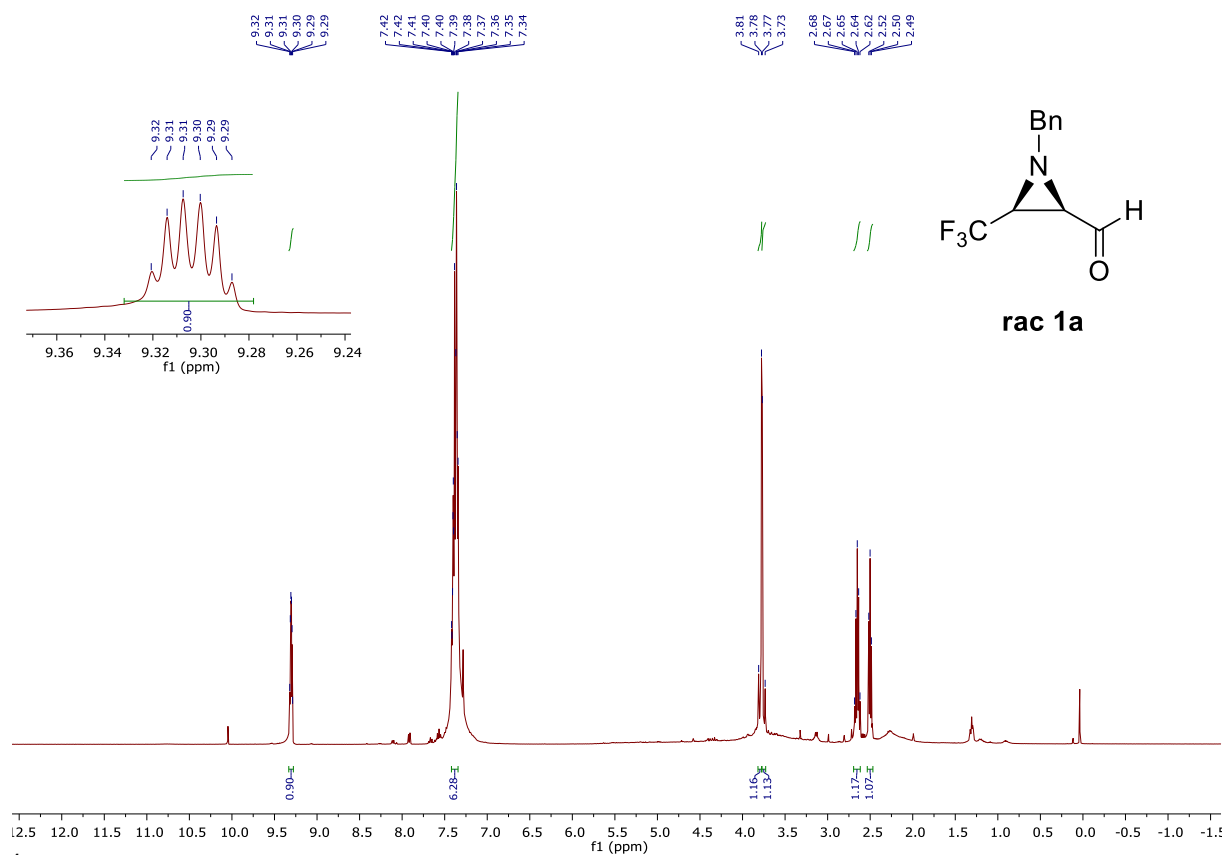

## $^{13}\text{C}$ NMR of rac 1a

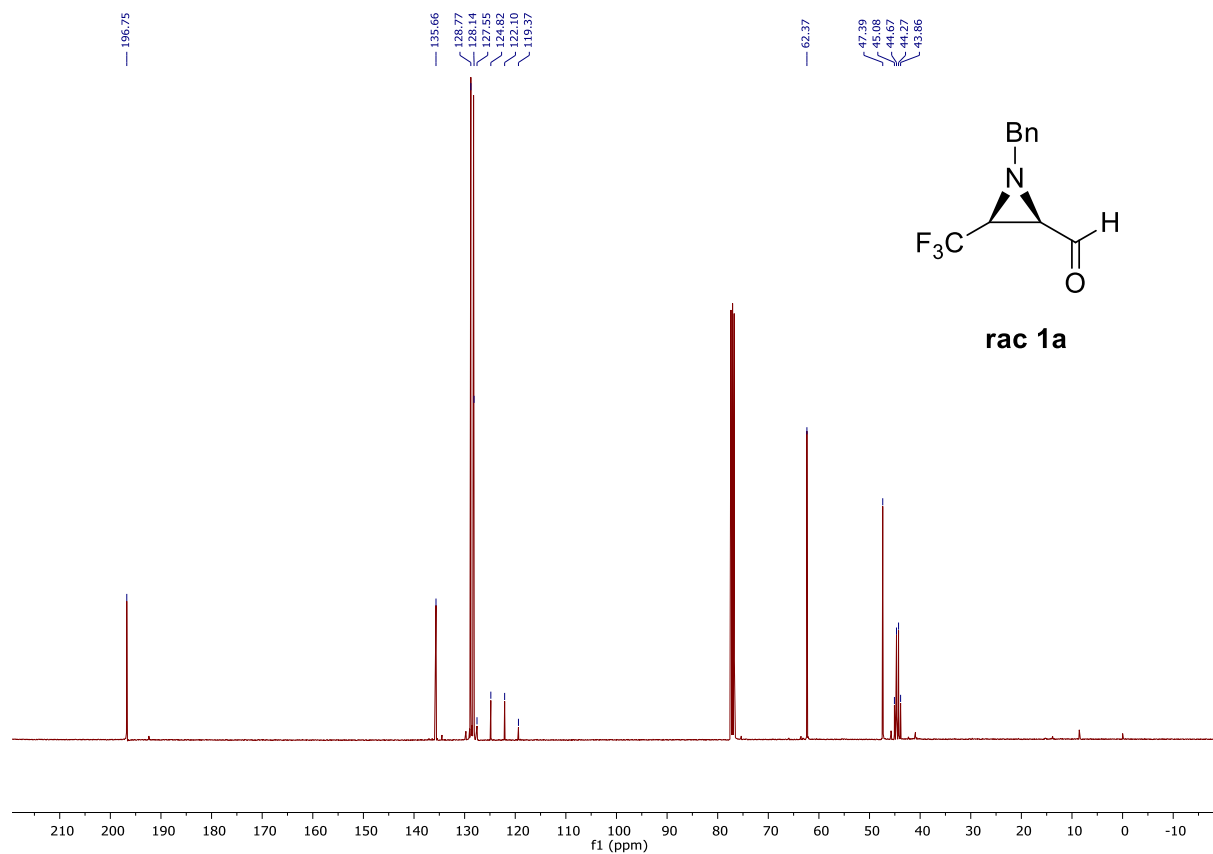

### <sup>13</sup>C NMR of rac 1a

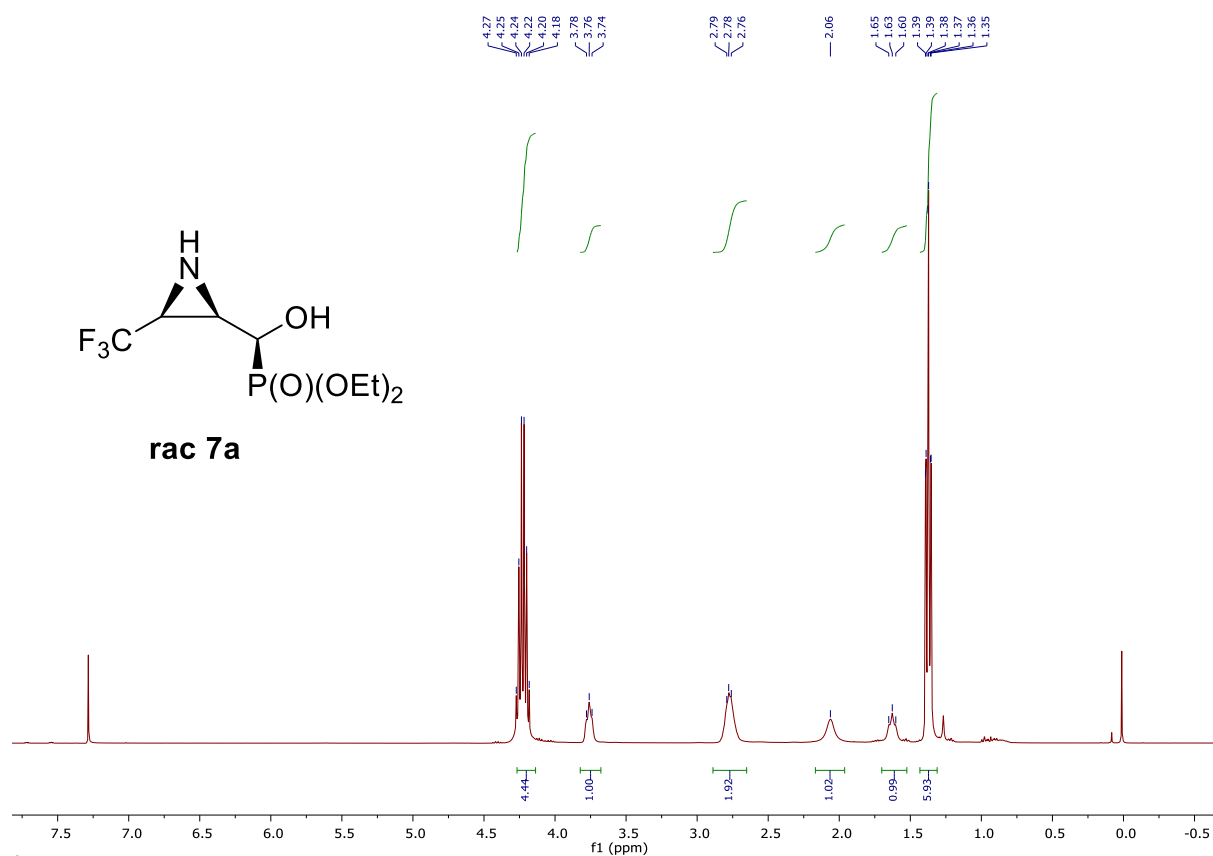

### <sup>1</sup>H NMR of rac 7a

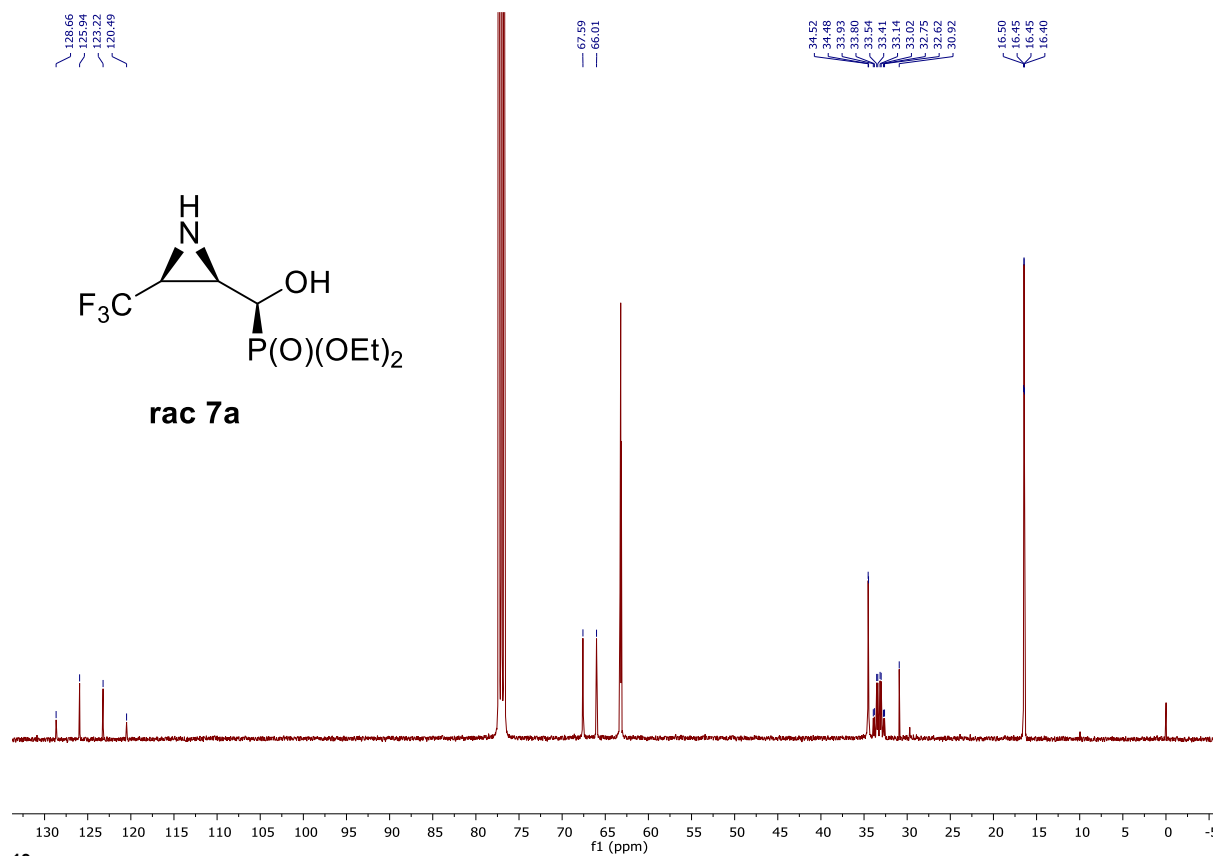

### <sup>13</sup>C NMR of rac 7a

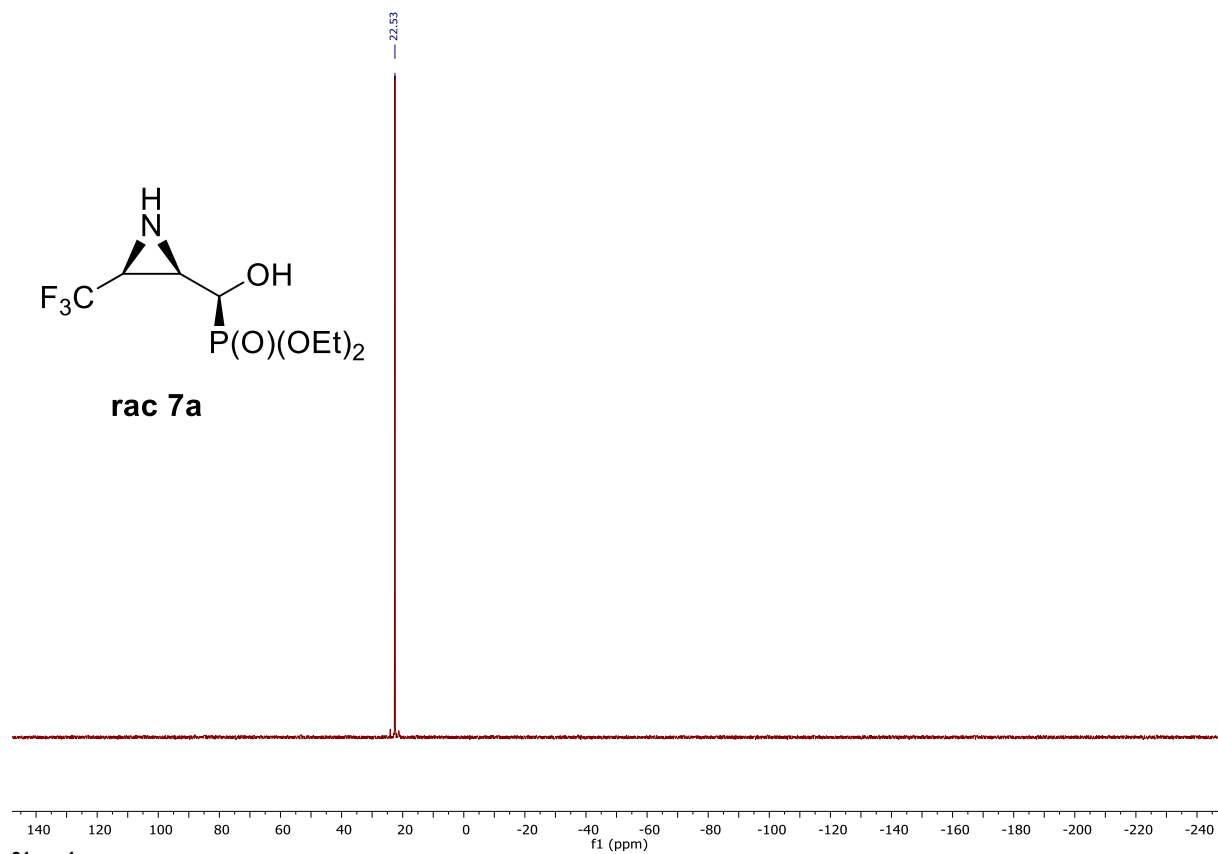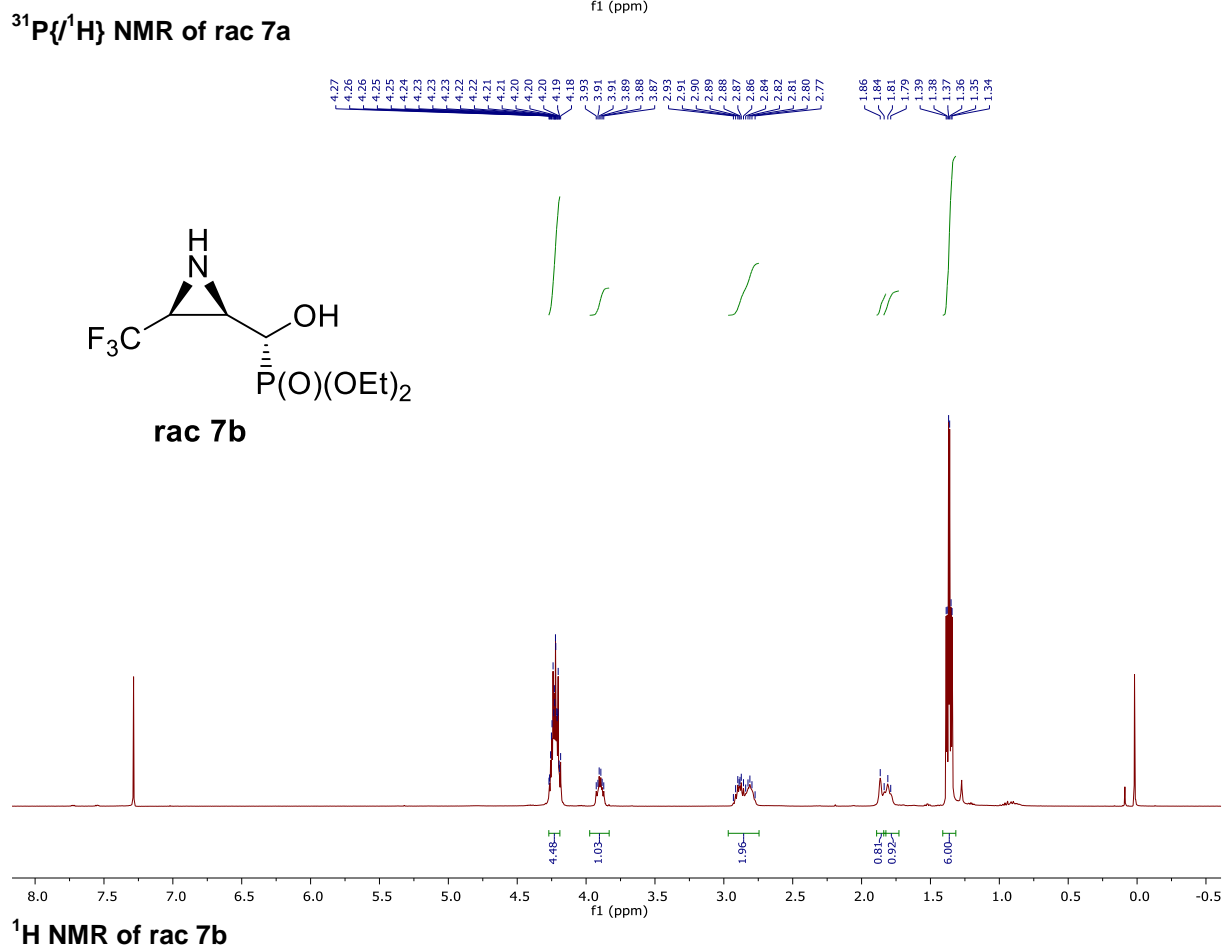

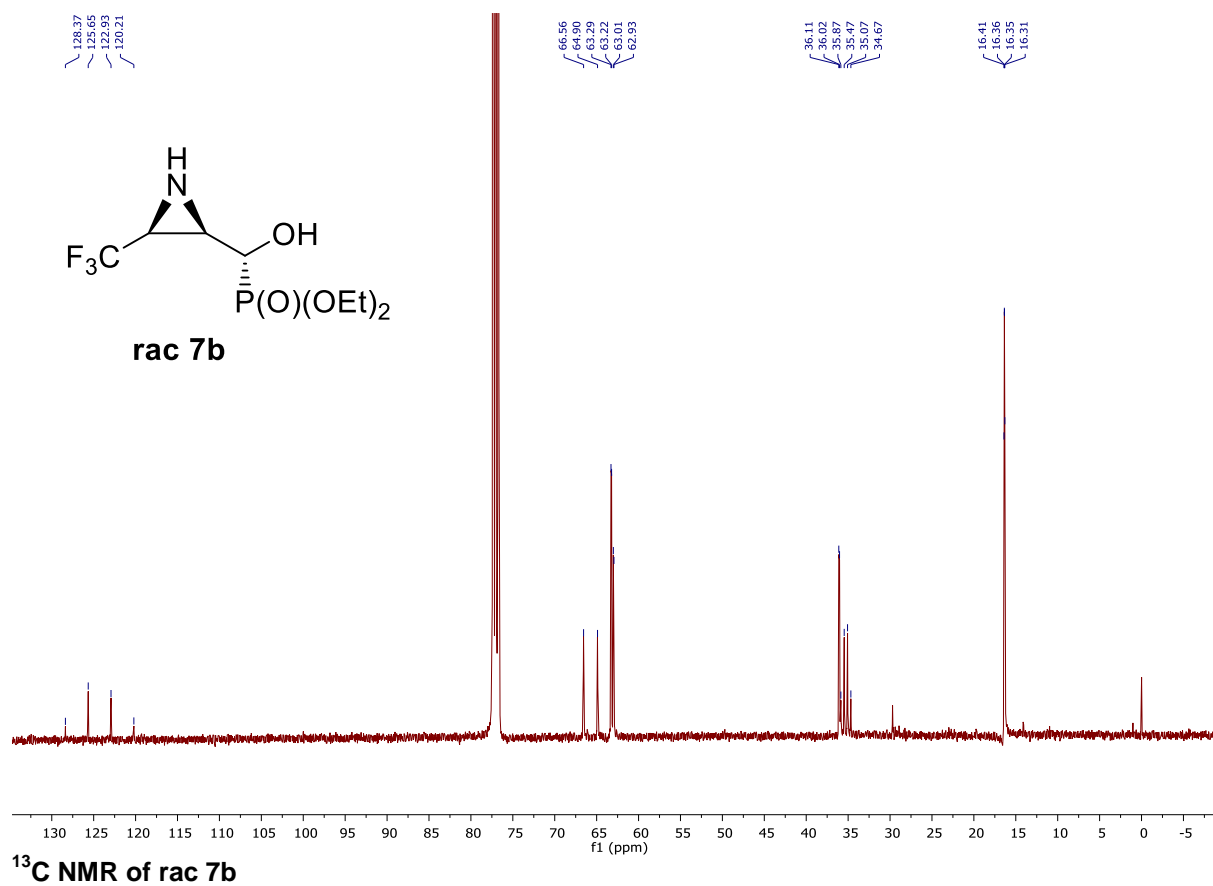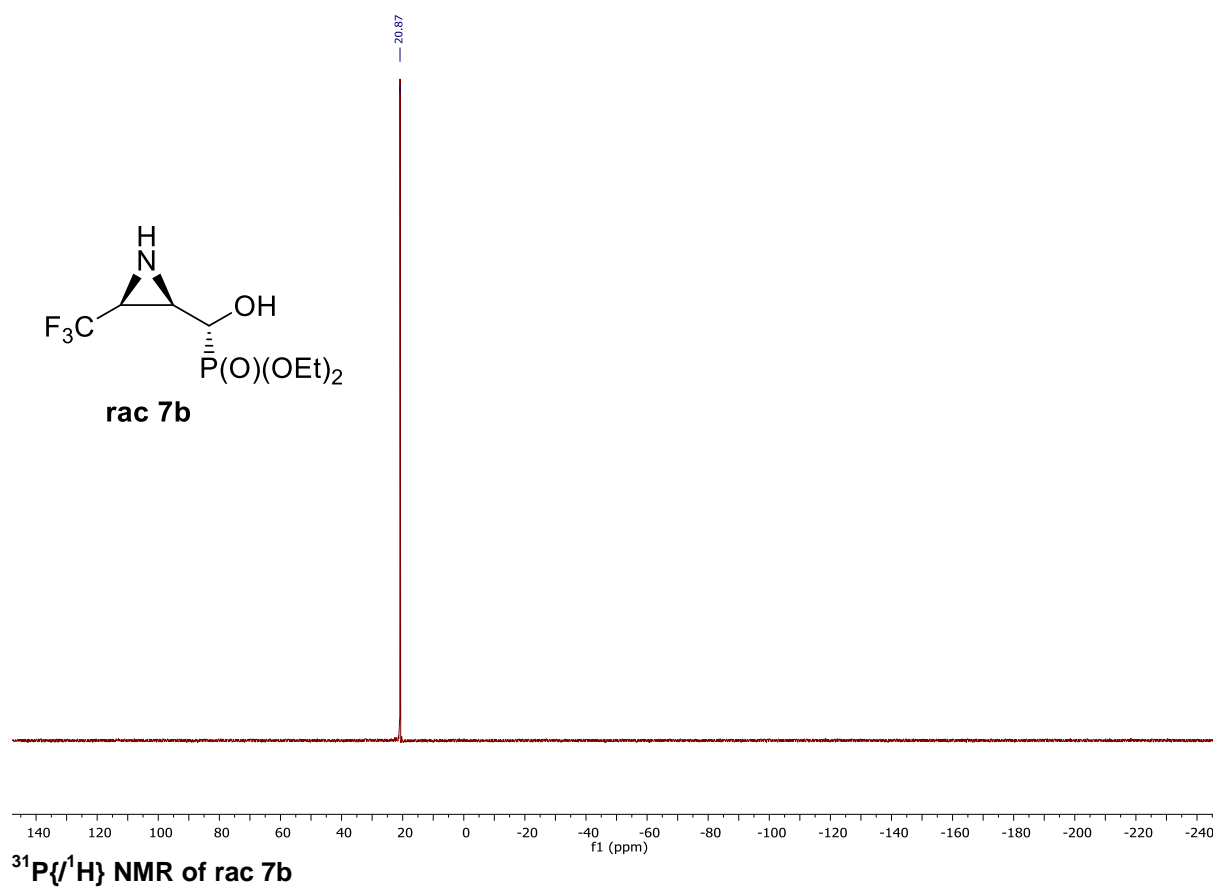

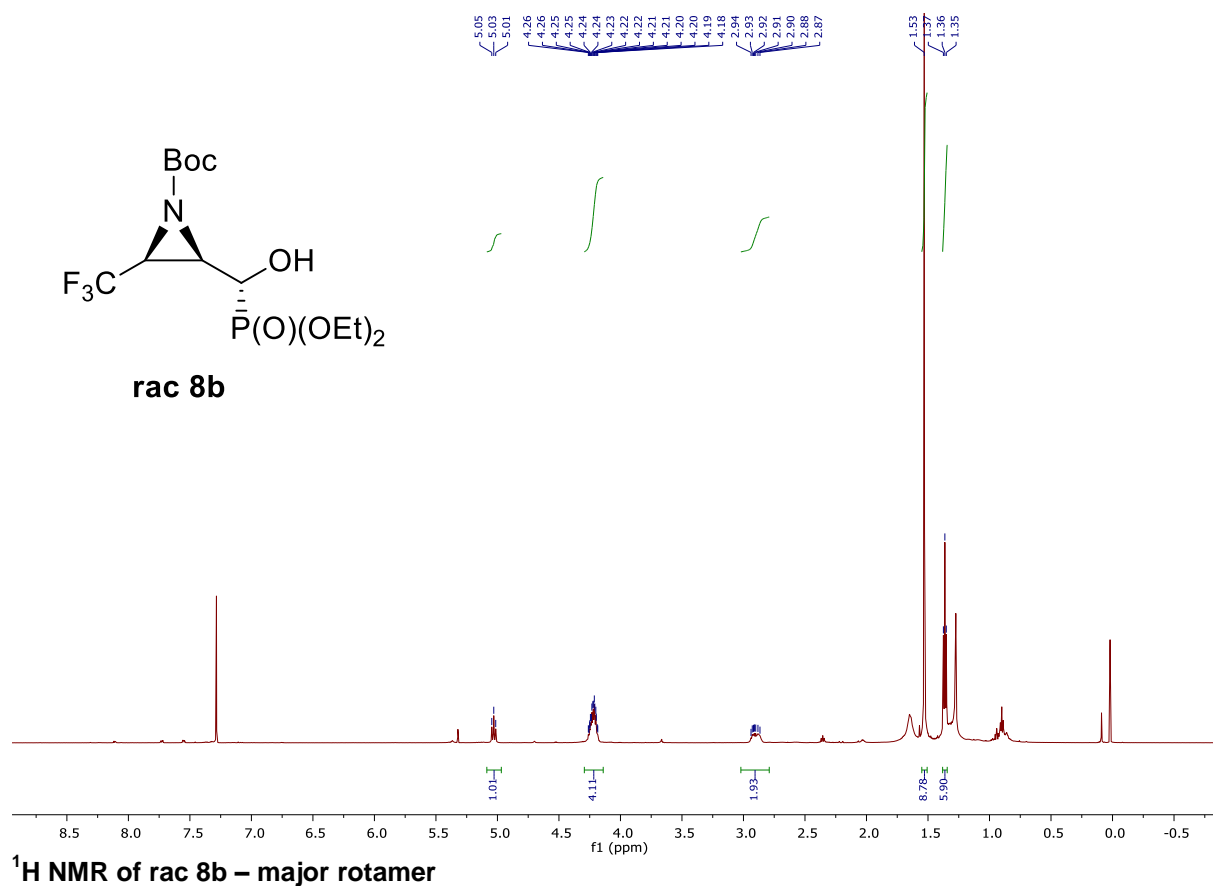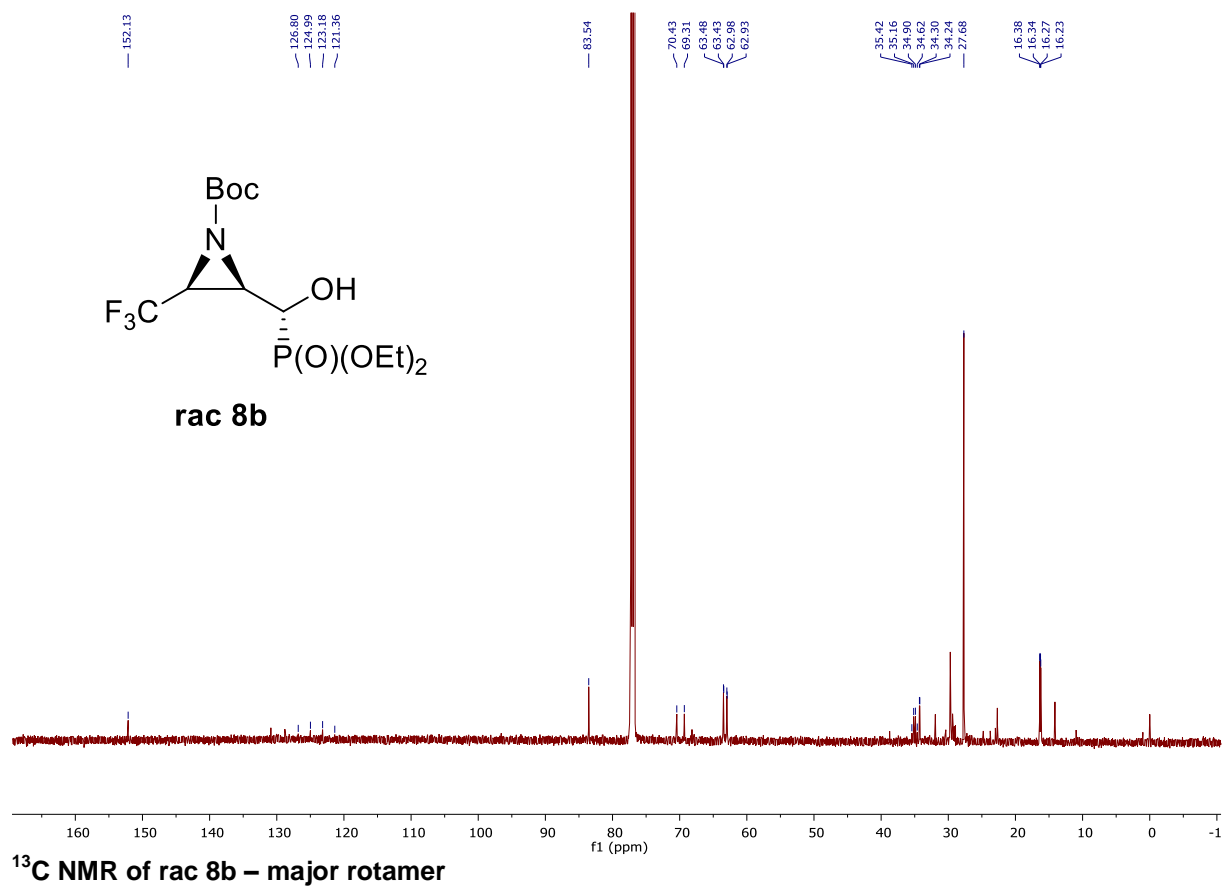

— 16.47

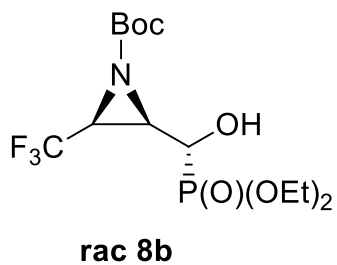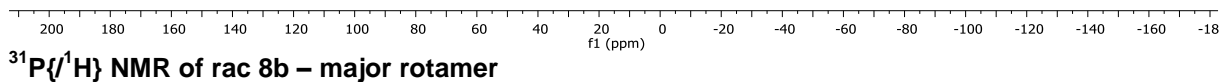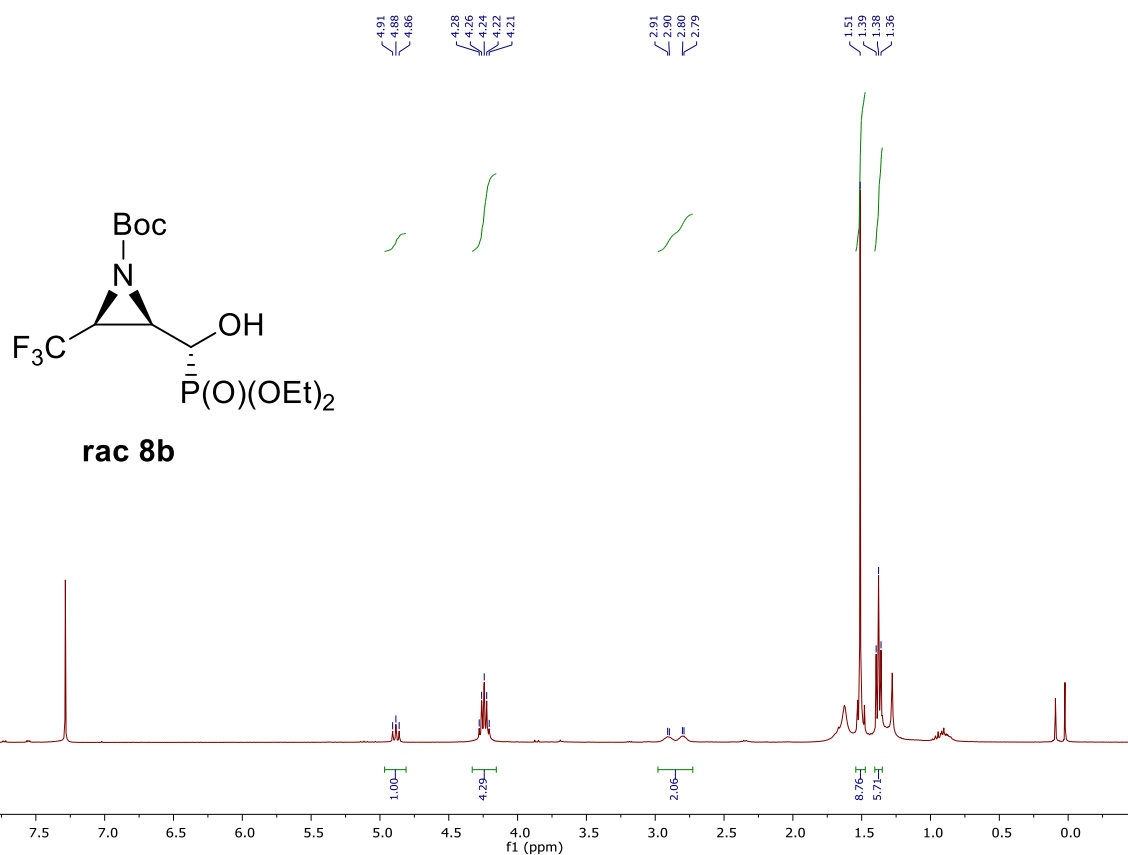

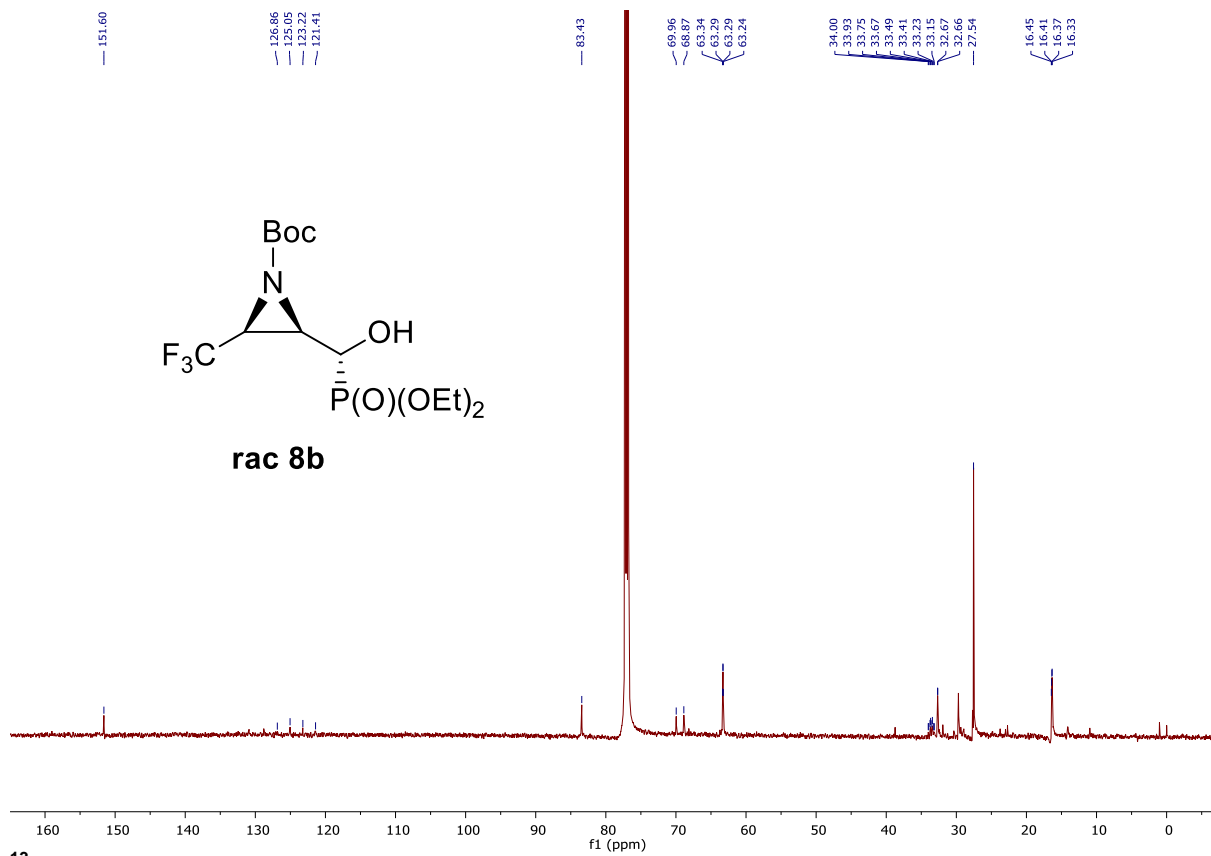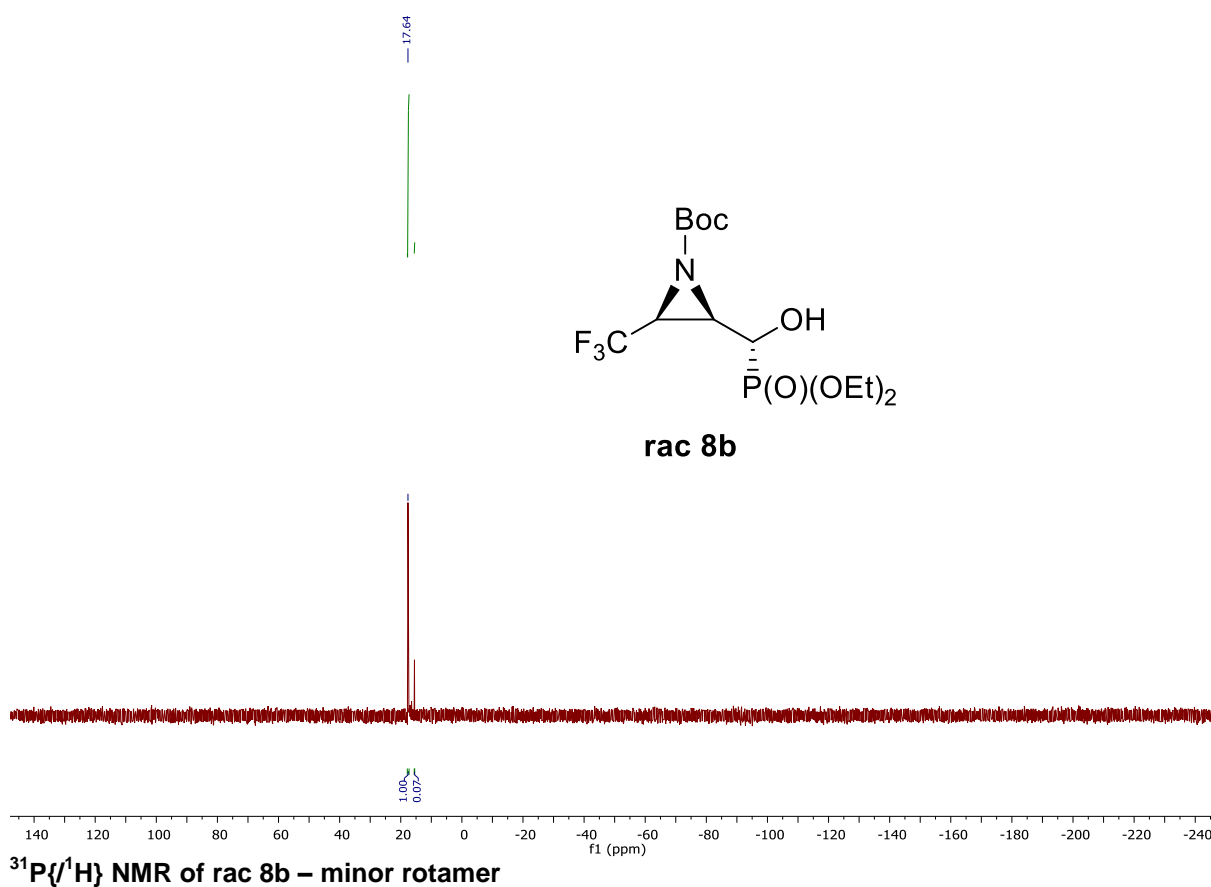



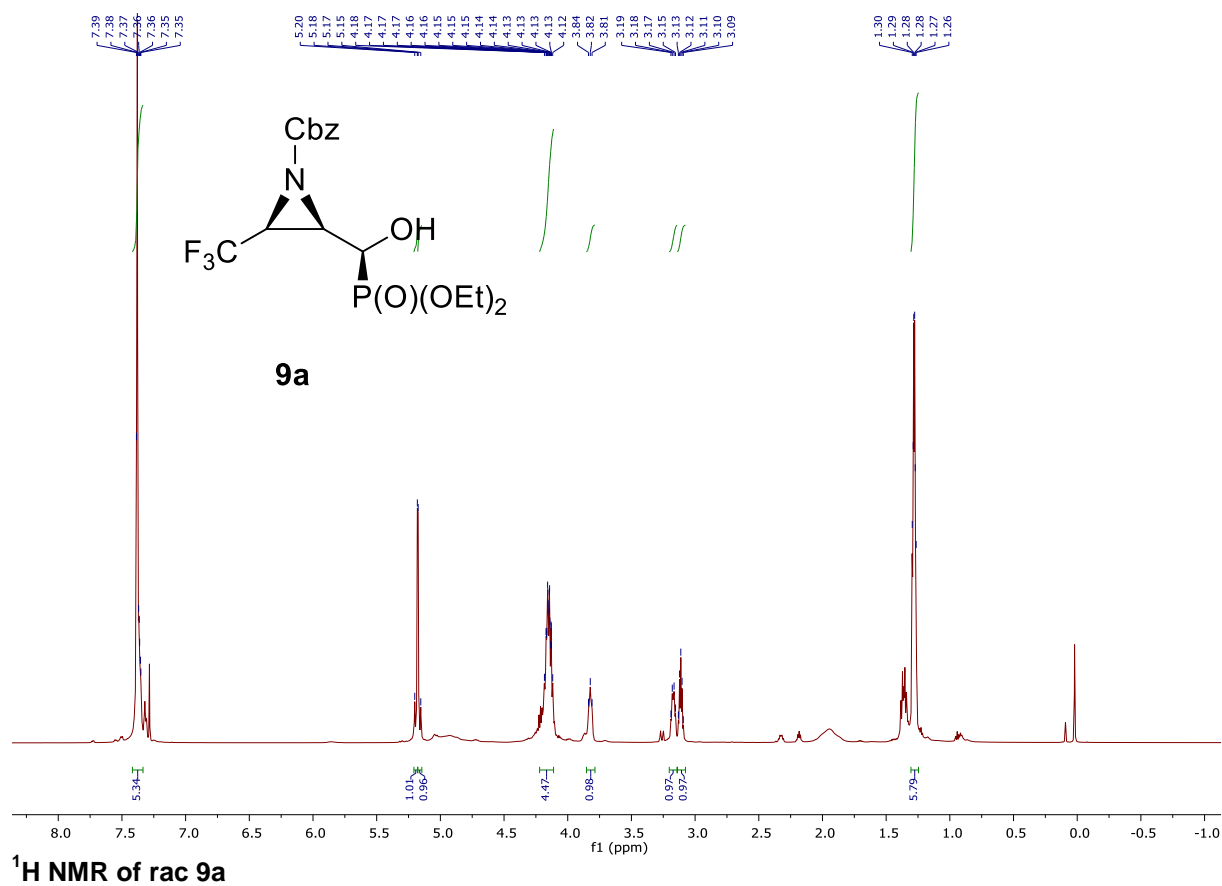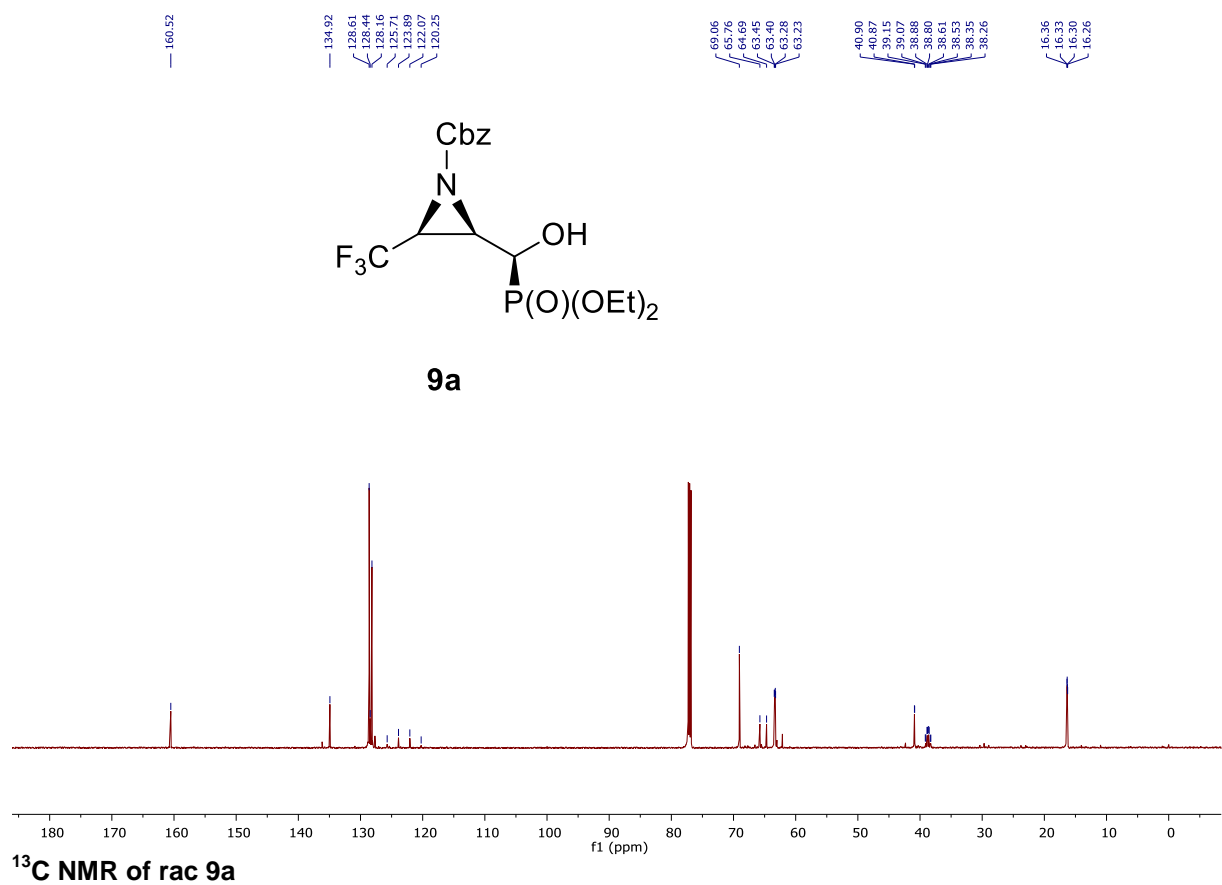

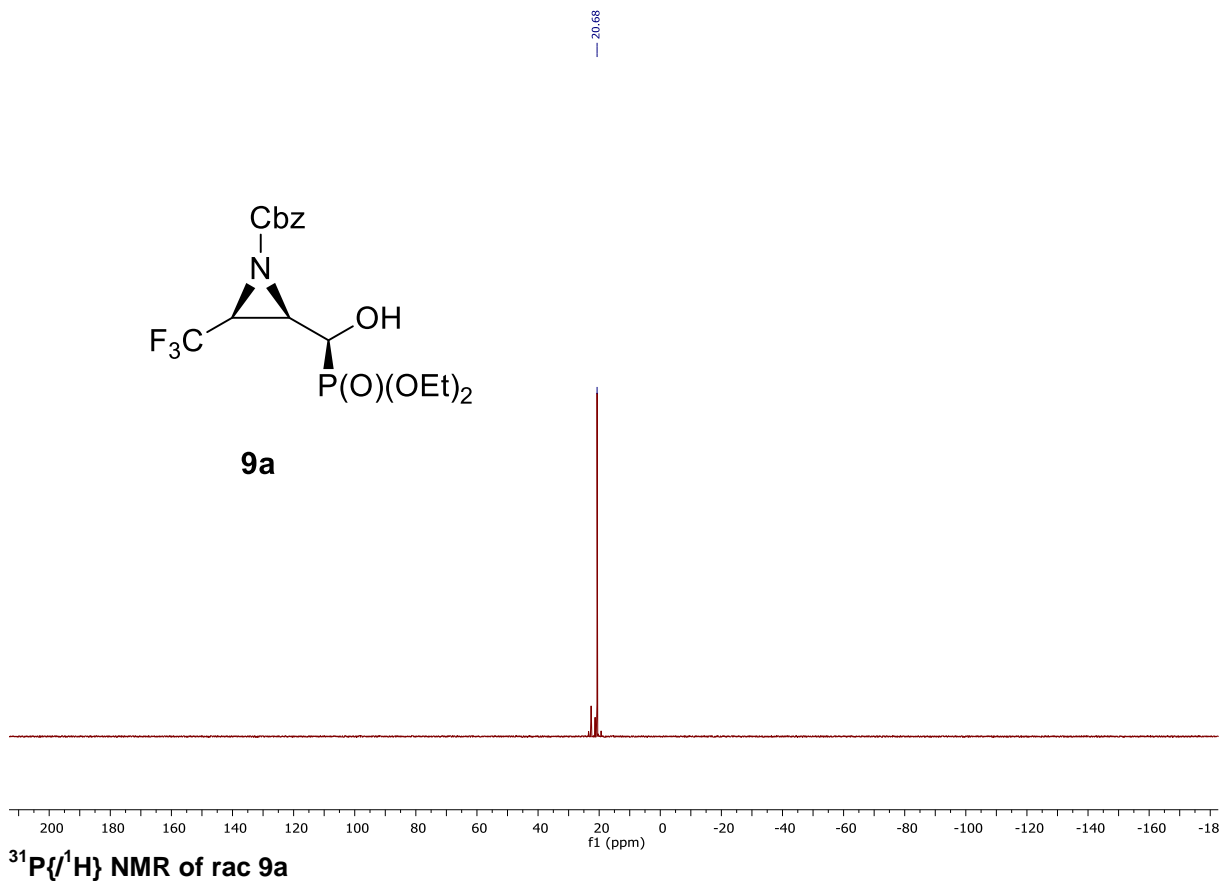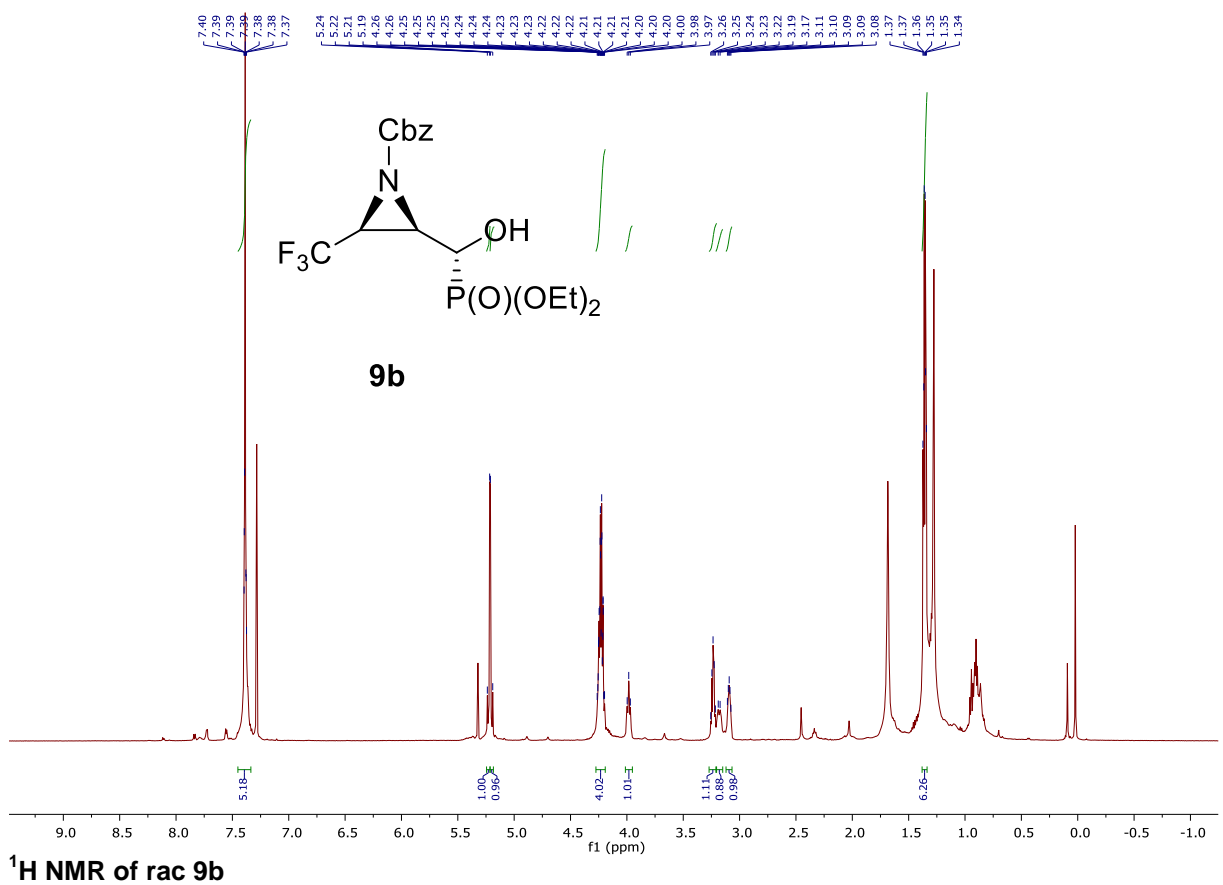

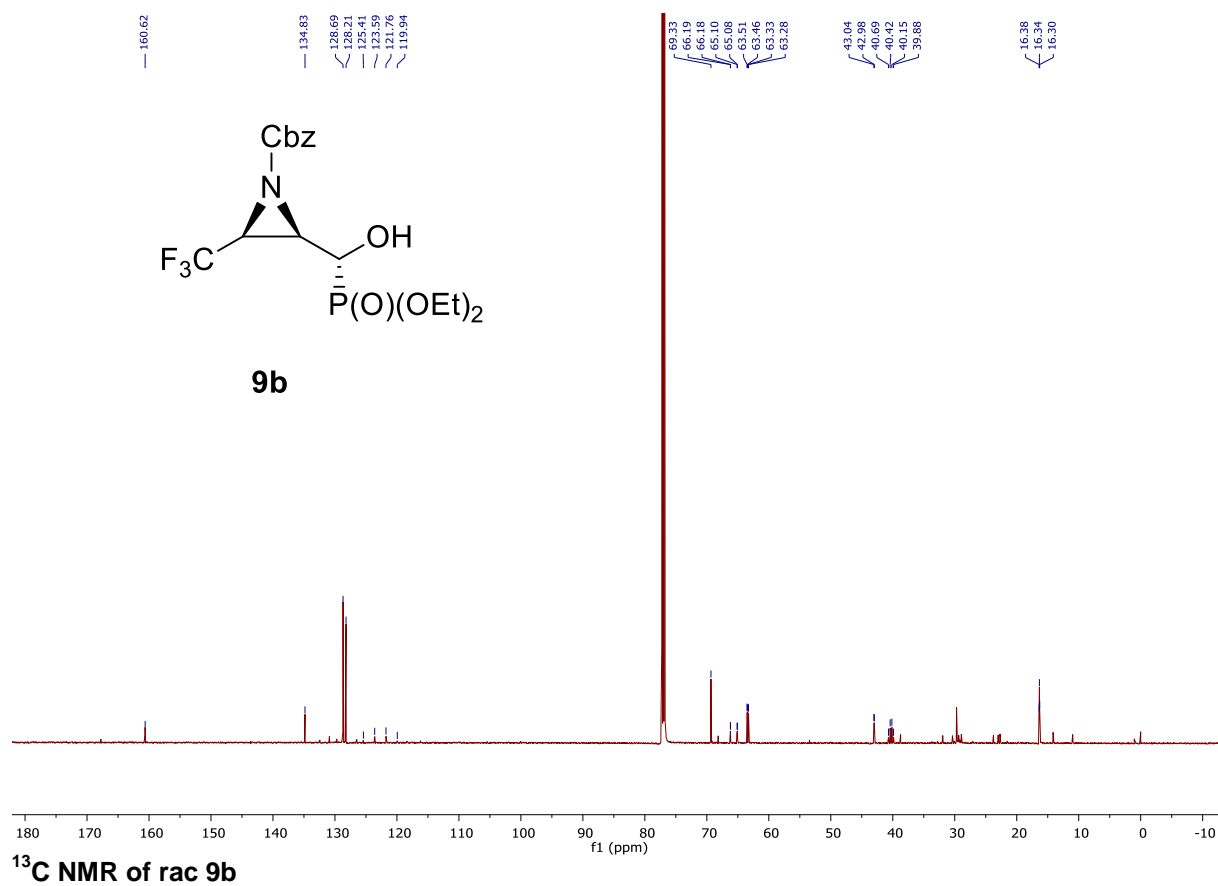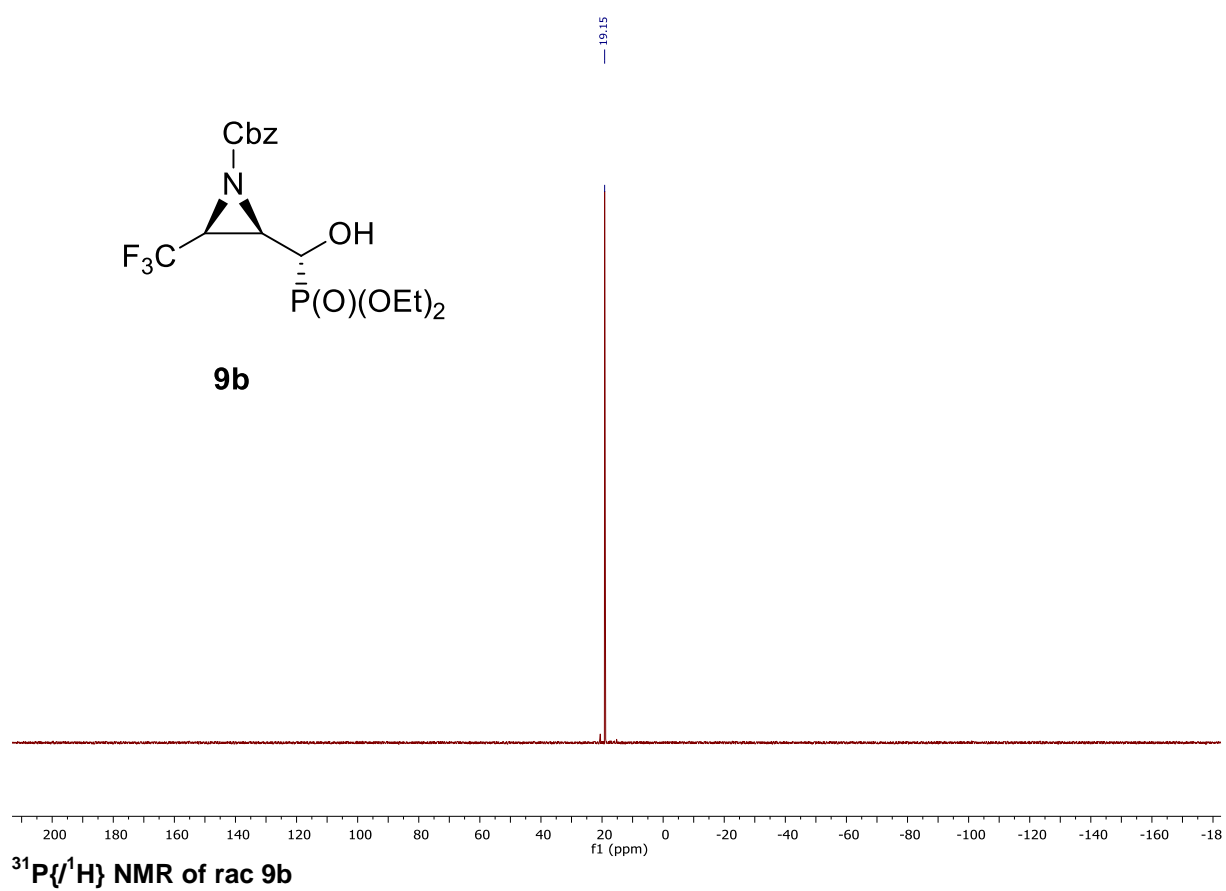

7.29 7.28 7.27 7.26 7.24 7.23 7.22 7.20 7.19 7.18 5.85 5.83 5.69 5.68 4.25 4.24 4.23 4.22 4.21 4.20 4.20 4.20 4.19 4.18 4.17 4.16 4.15 4.14 4.14 4.13 4.12 4.11 4.10 4.10 4.09 4.08 4.08 4.07 4.06 4.06 4.05 4.04 4.04 4.04 3.89 3.88 3.87 3.86 3.85 3.84 3.83 3.82 3.81 3.80 3.79 3.78 3.77 3.76 3.75 3.74 3.73 3.72 3.71 3.70 3.69 3.68 3.67 3.66 3.65 3.64 3.63 3.62 3.61 3.60 3.59 3.58 3.57 3.56 3.55 3.54 3.53 3.52 3.51 3.50 3.49 3.48 3.47 3.46 3.45 3.44 3.43 3.42 3.41 3.40 3.39 3.38 3.37 3.36 3.35 3.34 3.33 3.32 3.31 3.30 3.29 3.28 3.27 3.26 3.25 3.24 3.23 3.22 3.21 3.20 3.19 3.18 3.17 3.16 3.15 3.14 3.13 3.12 3.11 3.10 3.09 3.08 3.07 3.06 3.05 3.04 3.03 3.02 3.01 3.00 2.99 2.98 2.97 2.96 2.95 2.94 2.93 2.92 2.91 2.90 2.89 2.88 2.87 2.86 2.85 2.84 2.83 2.82 2.81 2.80 2.79 2.78 2.77 2.76 2.75 2.74 2.73 2.72 2.71 2.70 2.69 2.68 2.67 2.66 2.65 2.64 2.63 2.62 2.61 2.60 2.59 2.58 2.57 2.56 2.55 2.54 2.53 2.52 2.51 2.50 2.49 2.48 2.47 2.46 2.45 2.44 2.43 2.42 2.41 2.40 2.39 2.38 2.37 2.36 2.35 2.34 2.33 2.32 2.31 2.30 2.29 2.28 2.27 2.26 2.25 2.24 2.23 2.22 2.21 2.20 2.19 2.18 2.17 2.16 2.15 2.14 2.13 2.12 2.11 2.10 2.09 2.08 2.07 2.06 2.05 2.04 2.03 2.02 2.01 2.00 1.99 1.98 1.97 1.96 1.95 1.94 1.93 1.92 1.91 1.90 1.89 1.88 1.87 1.86 1.85 1.84 1.83 1.82 1.81 1.80 1.79 1.78 1.77 1.76 1.75 1.74

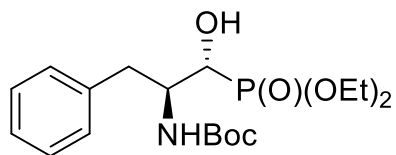

11a

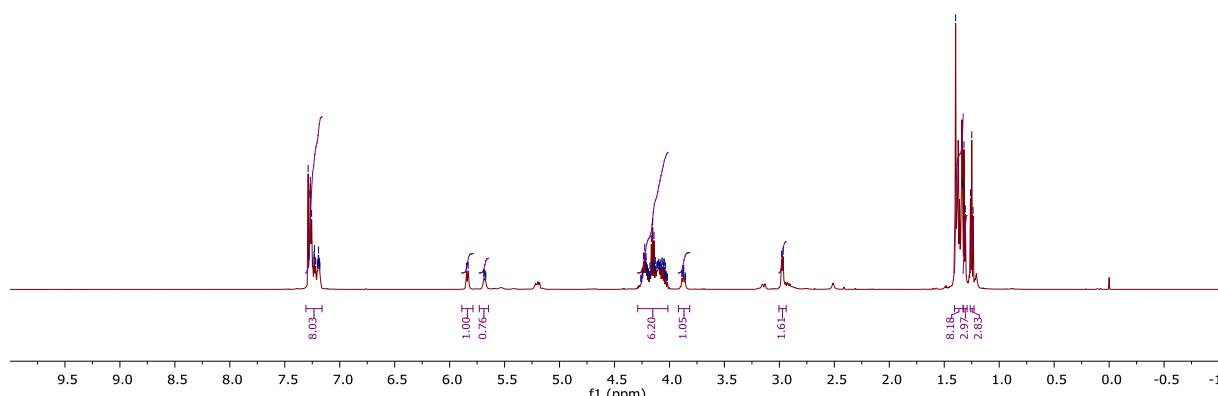

<sup>1</sup>H NMR of 11a. Mixture of 11a and 11b [1.9:1, d.r.]

155.50 138.07 129.37 128.36 126.22 78.95 68.17 67.09 62.99 62.94 62.45 62.40 52.89 38.12 28.26 16.36 16.33 16.29

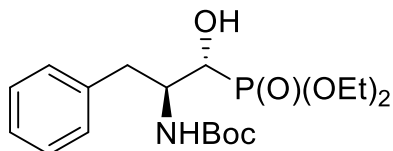

11a

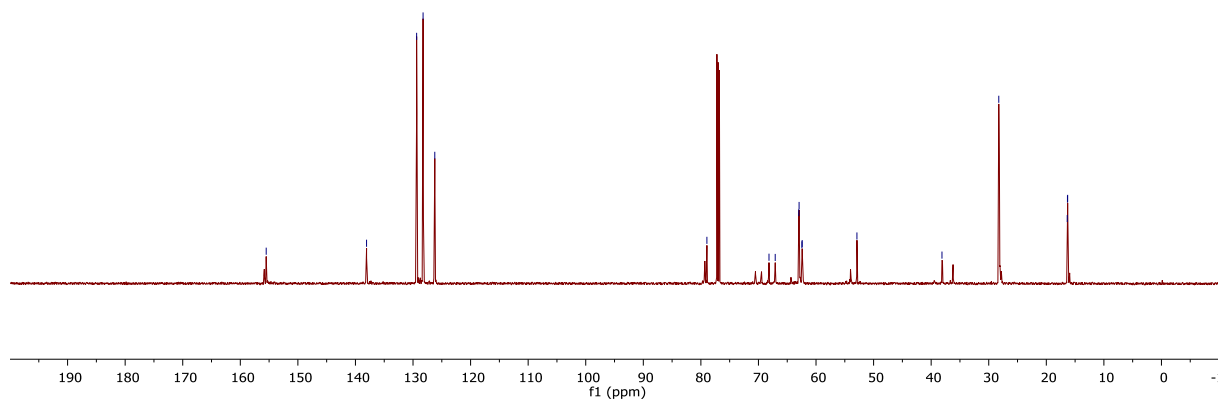

<sup>13</sup>C NMR of 11a. Mixture of 11a and 11b [1.9:1, d.r.]

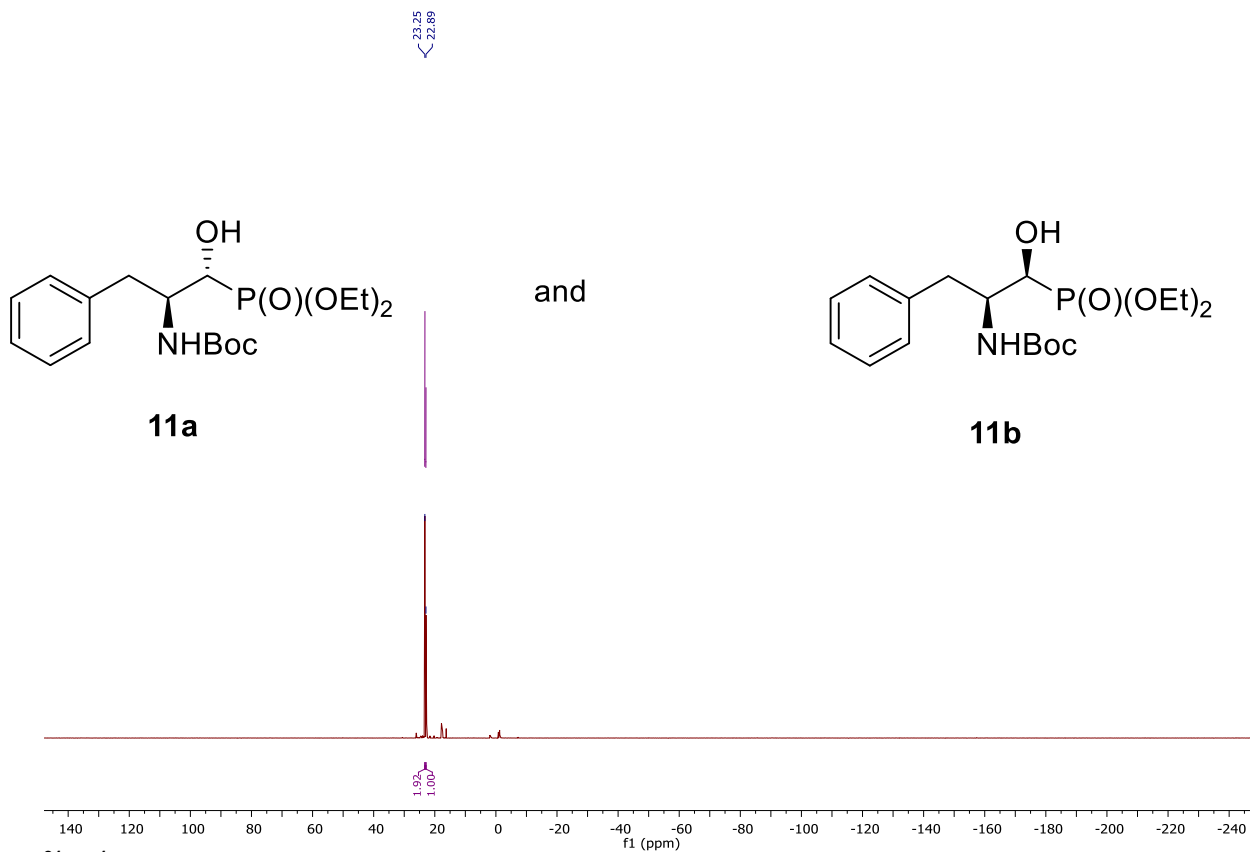

**$^{31}\text{P}\{^1\text{H}\}$  NMR of 11a and 11b [1.9:1, d.r.]**

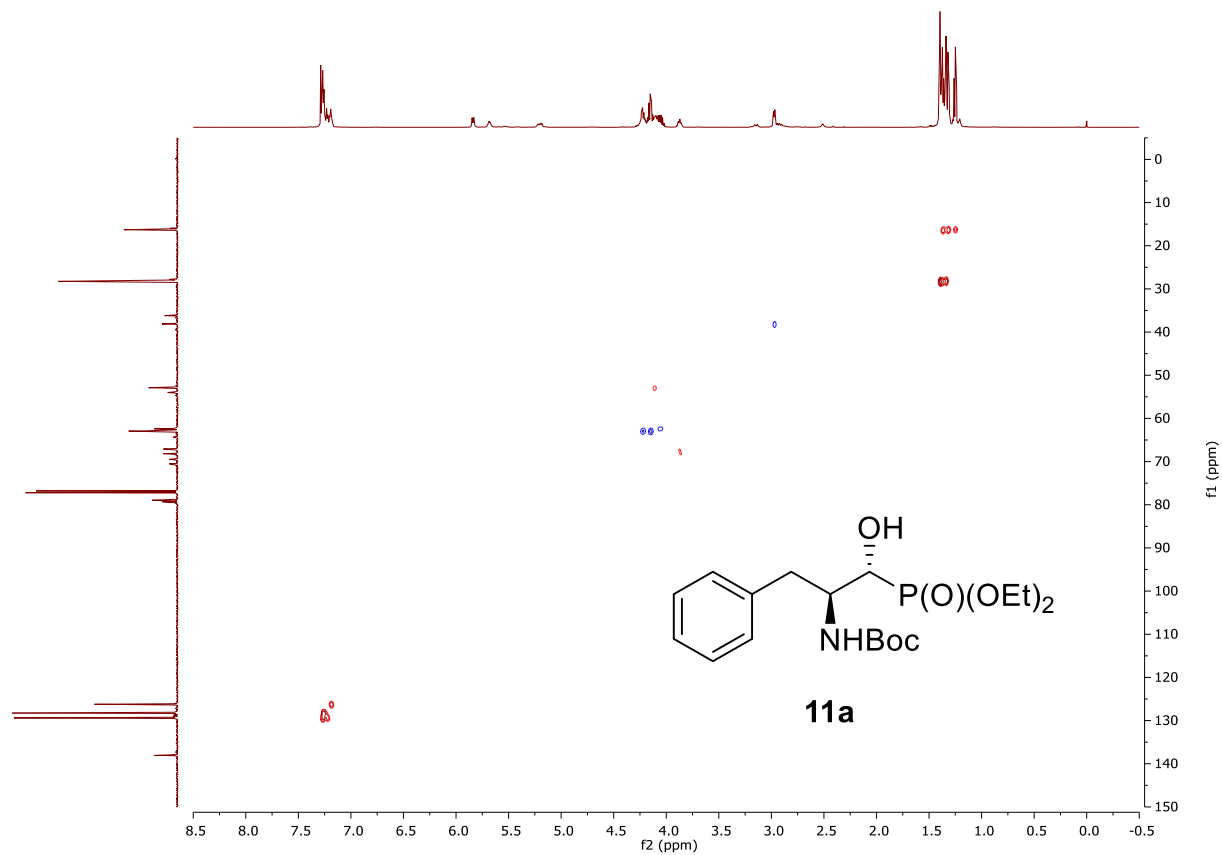

**HSQC of 11a. Mixture of 11a and 11b [1.9:1, d.r.]**

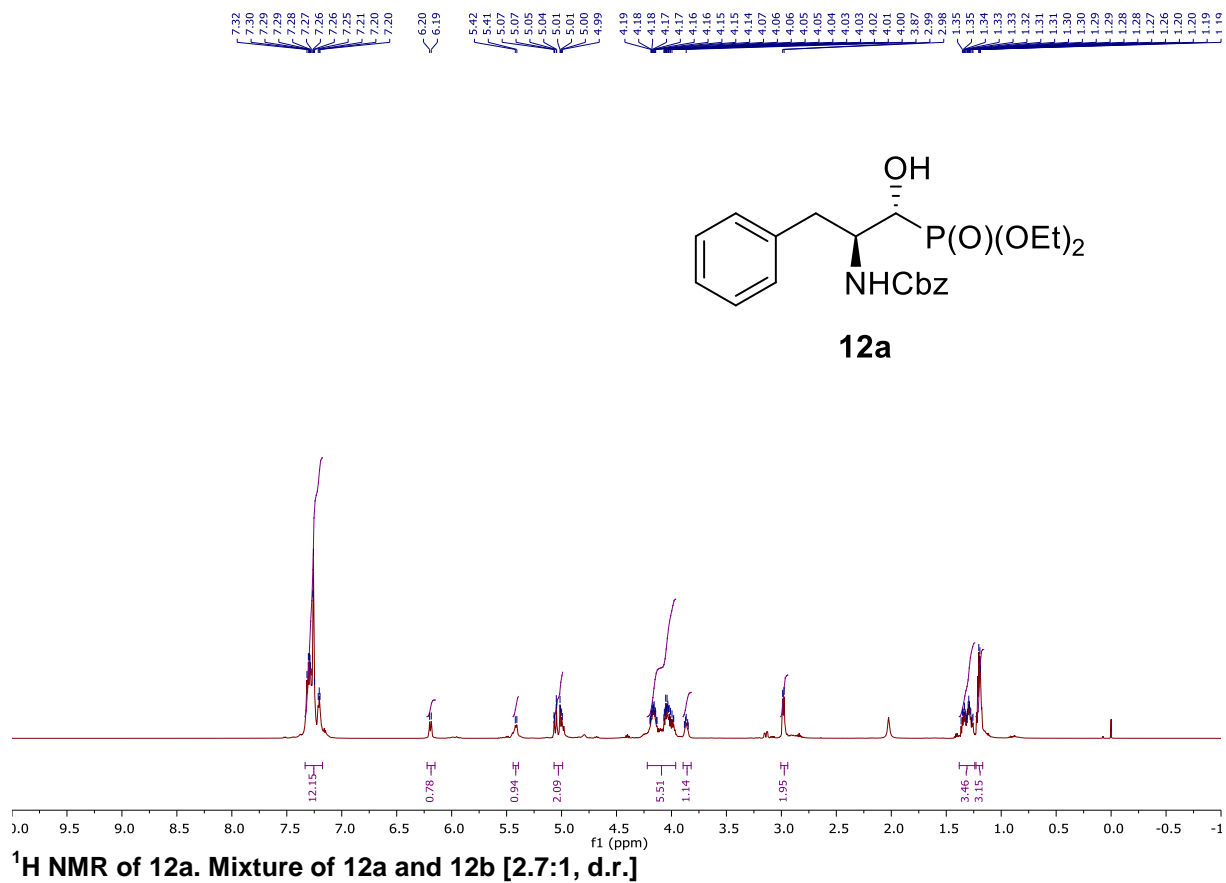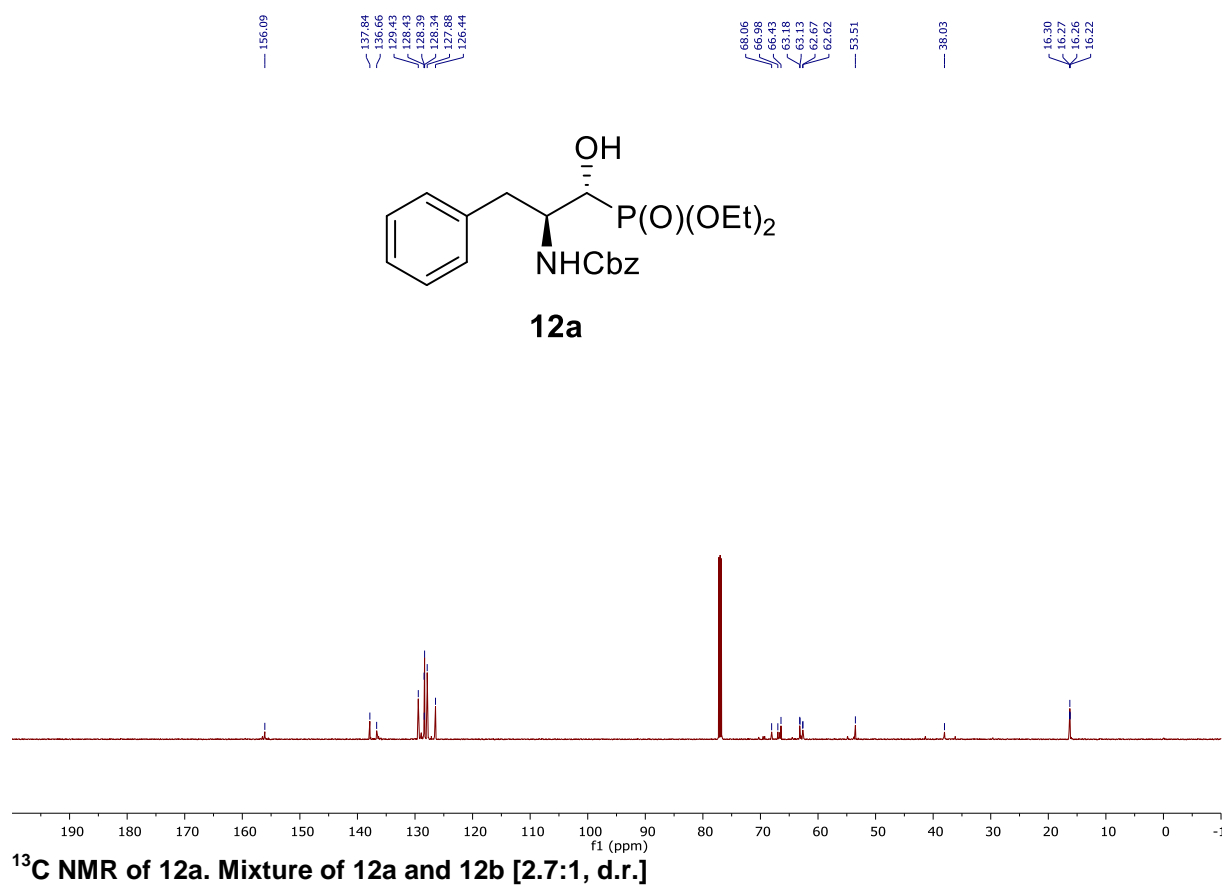

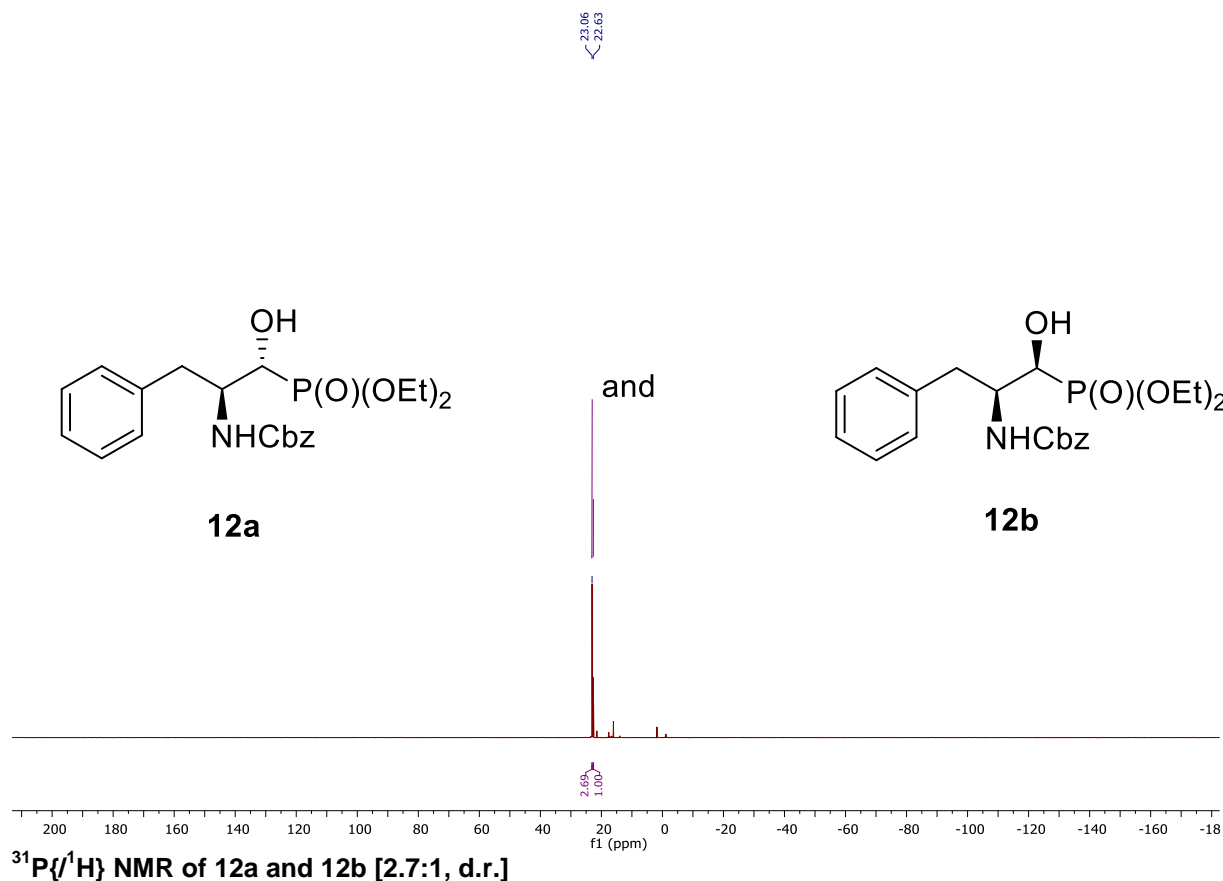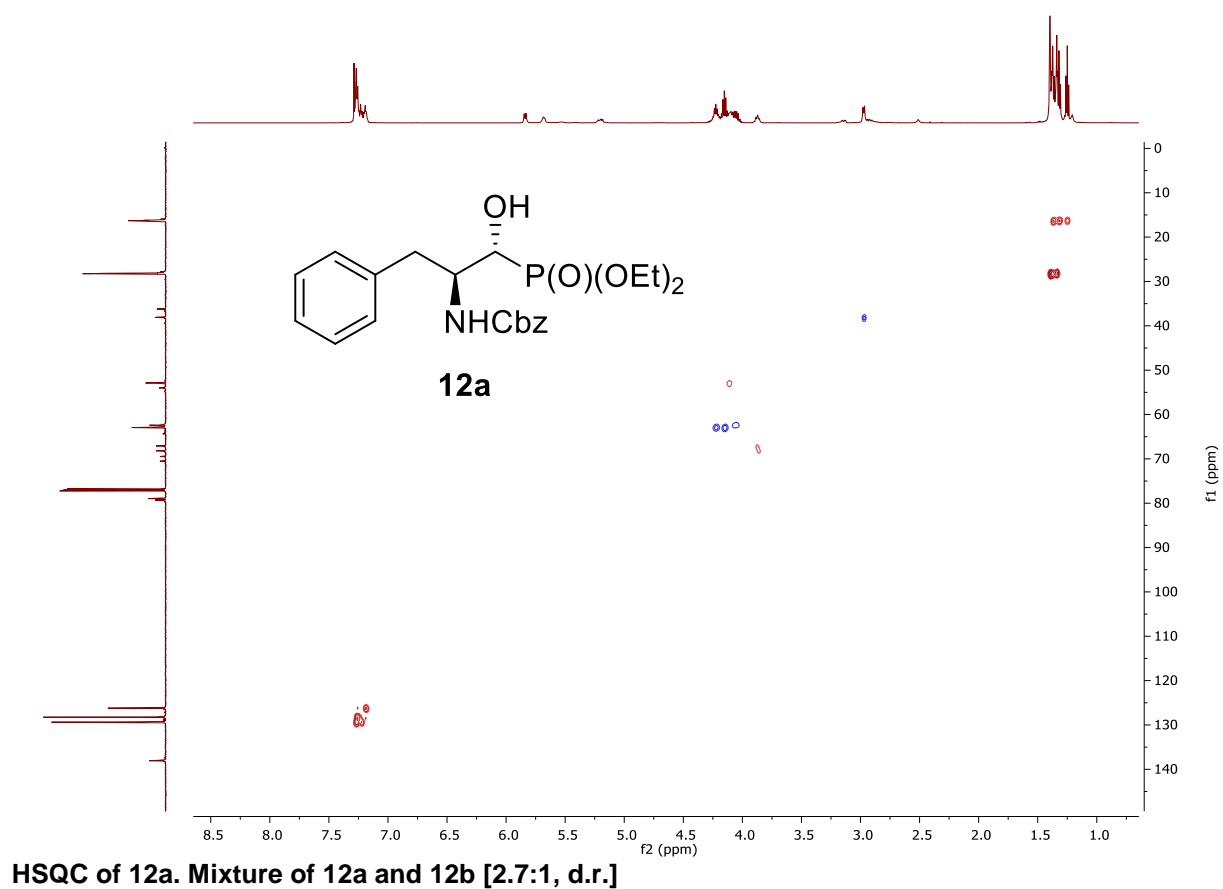

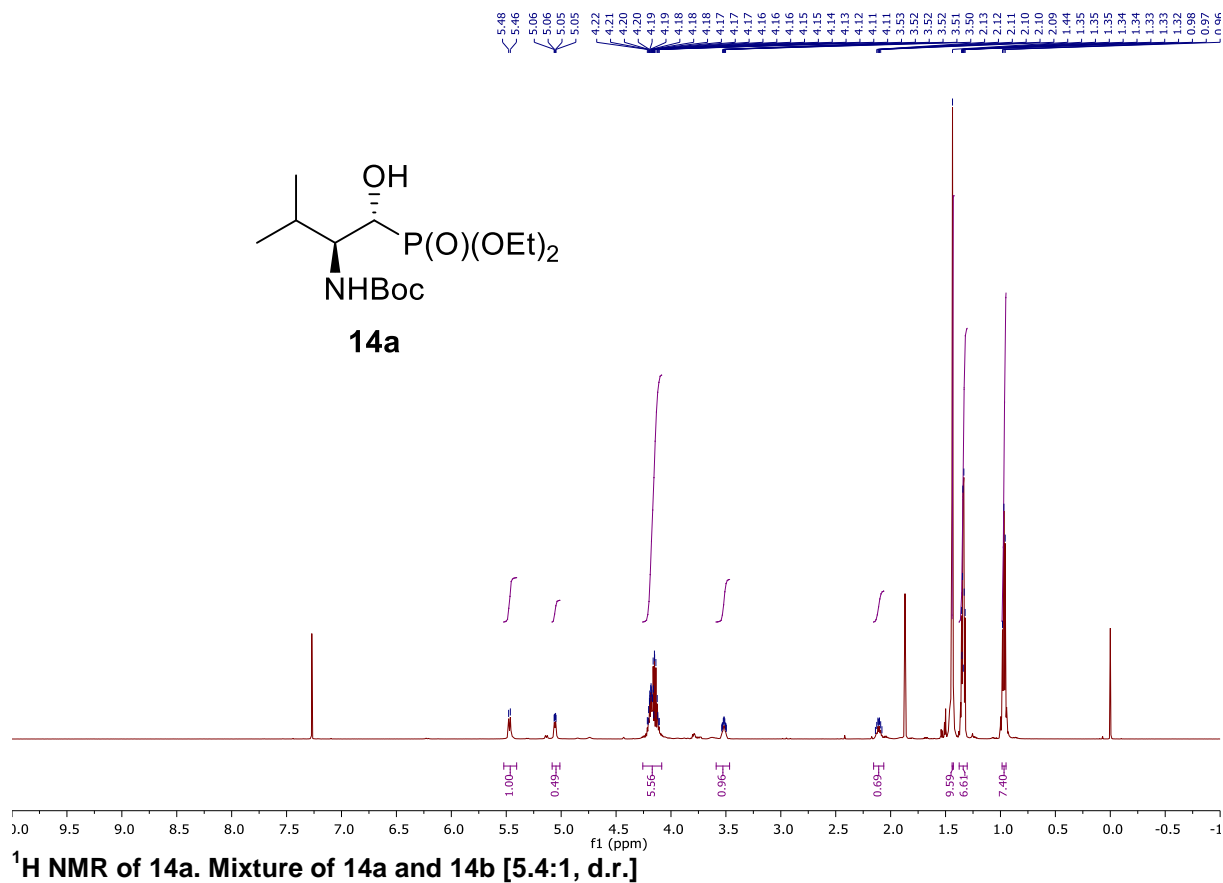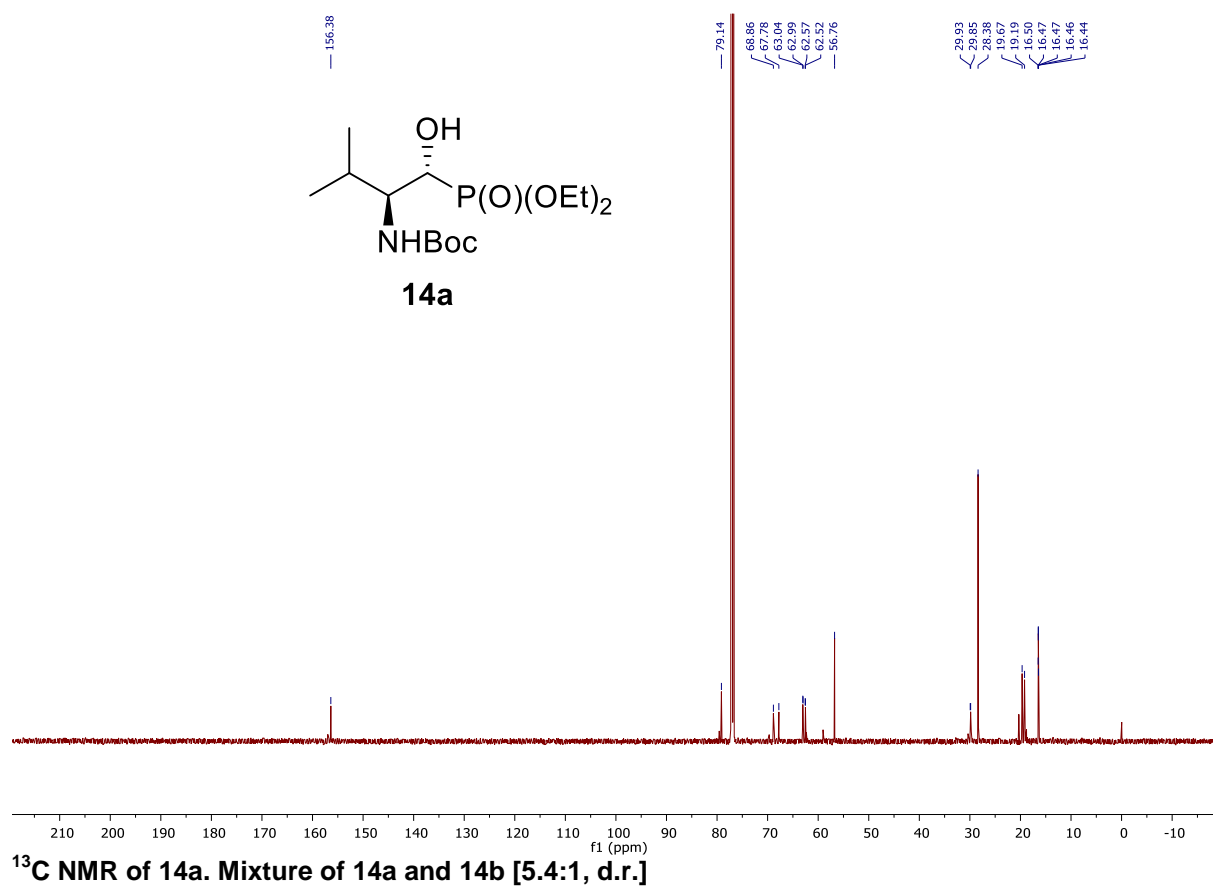



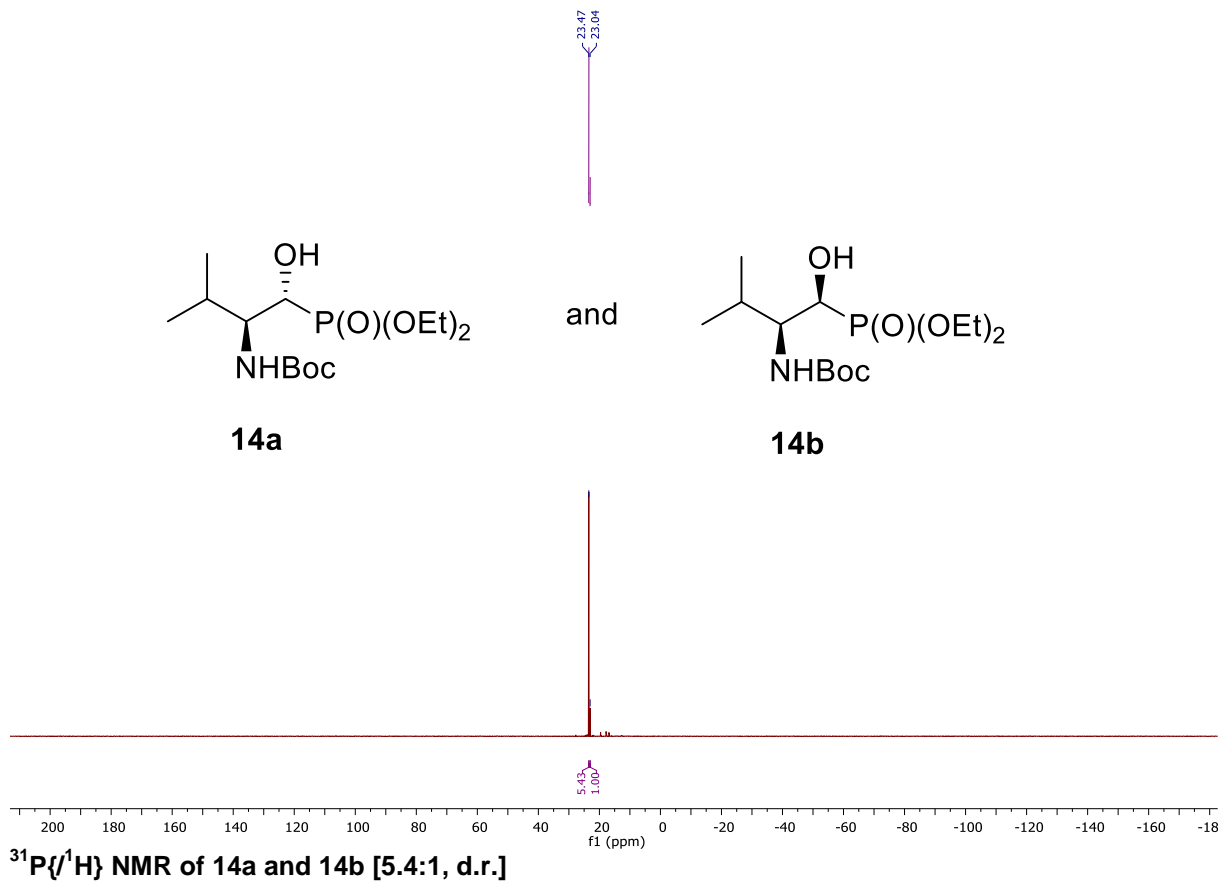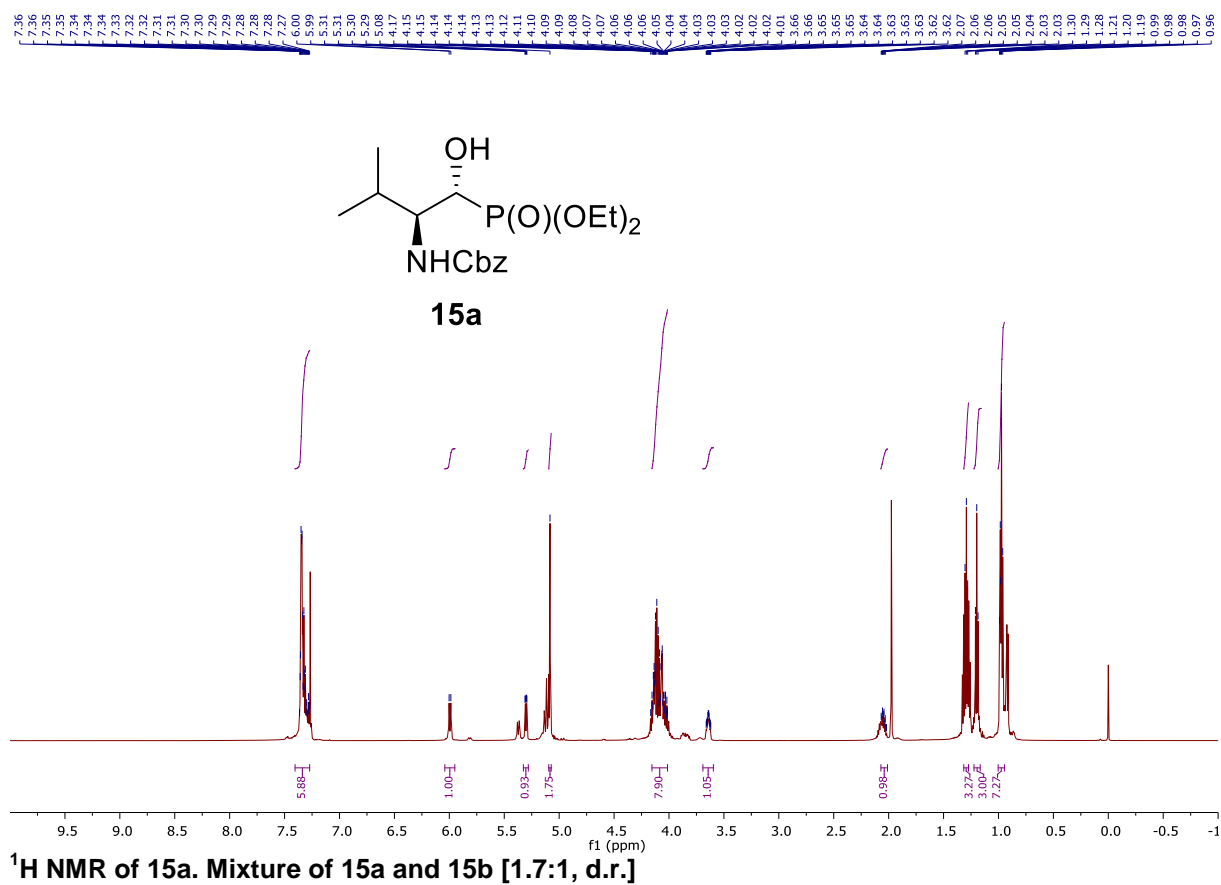

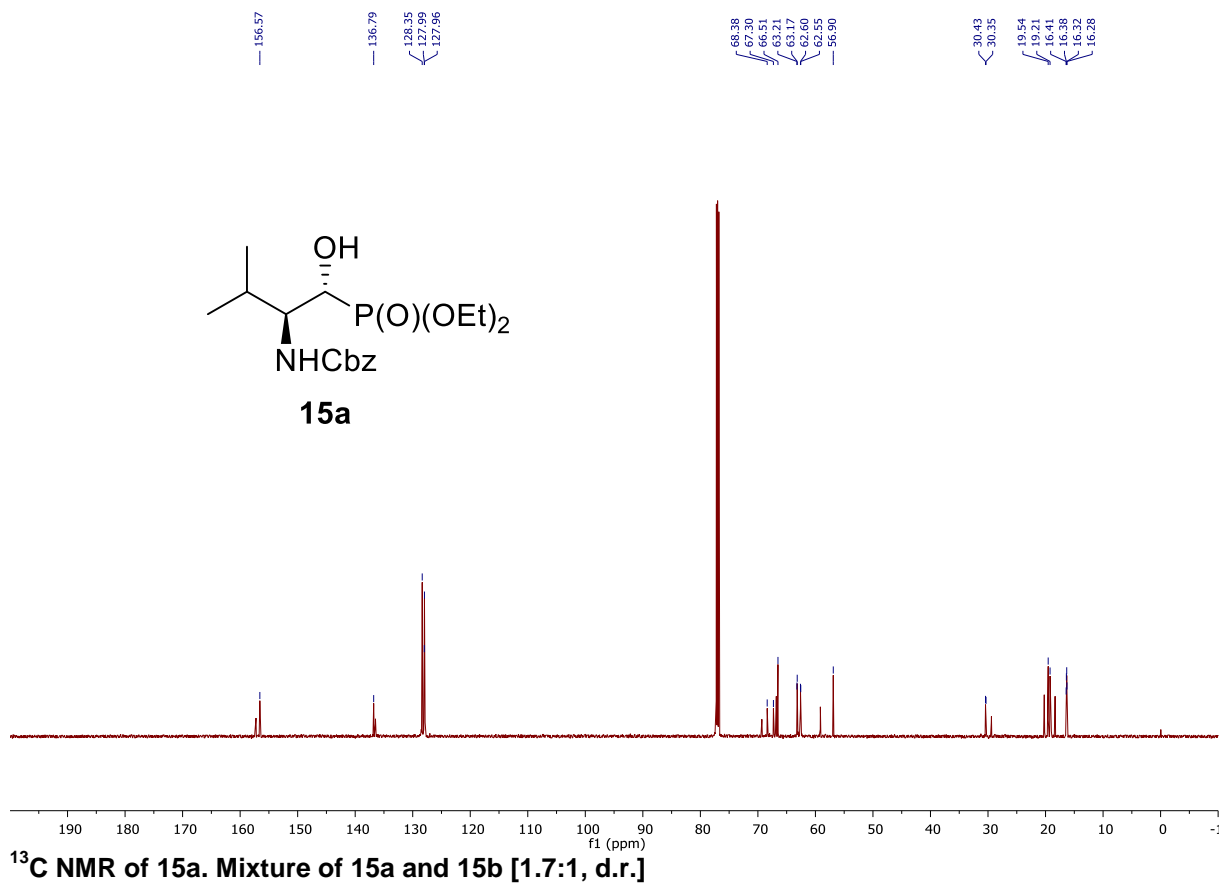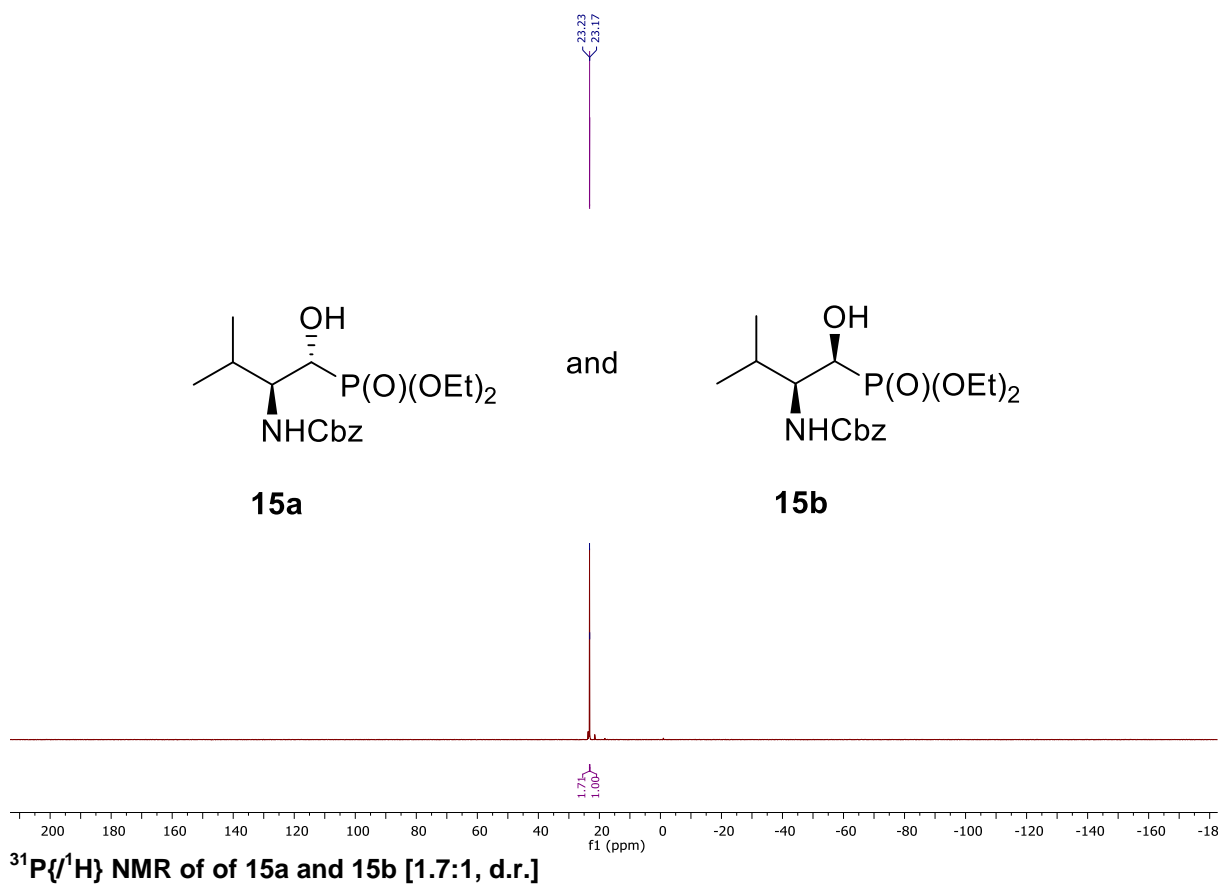

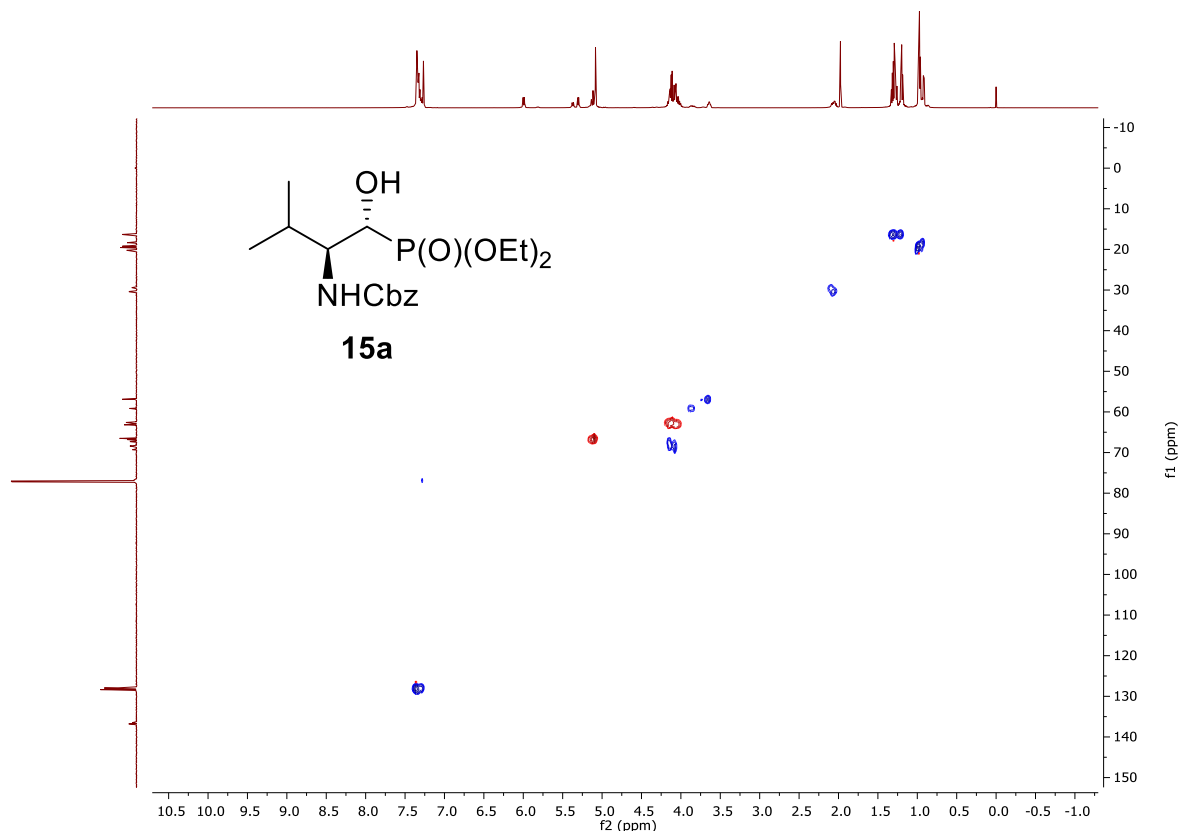

HSQC of 15a. Mixture of 15a and 15b [1.7:1, d.r.]

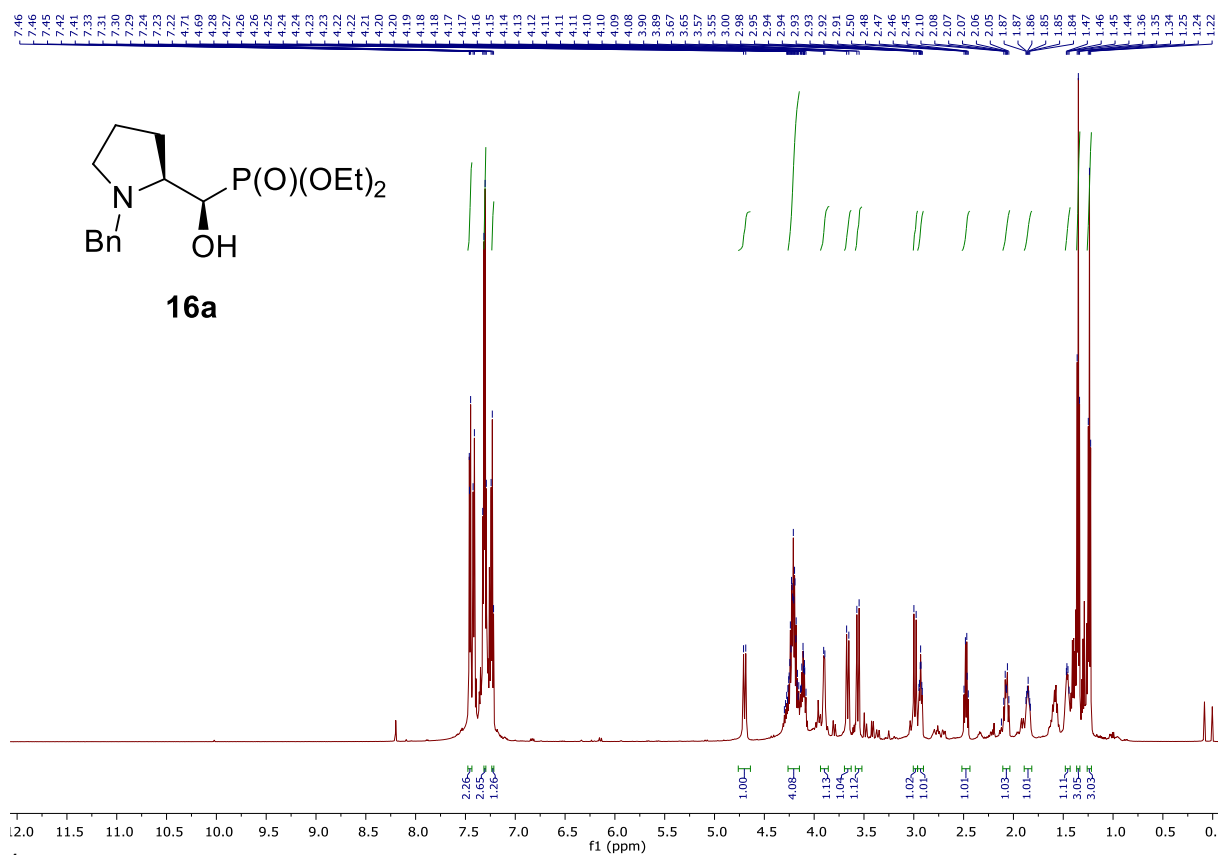

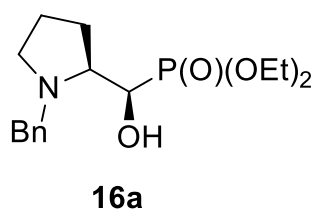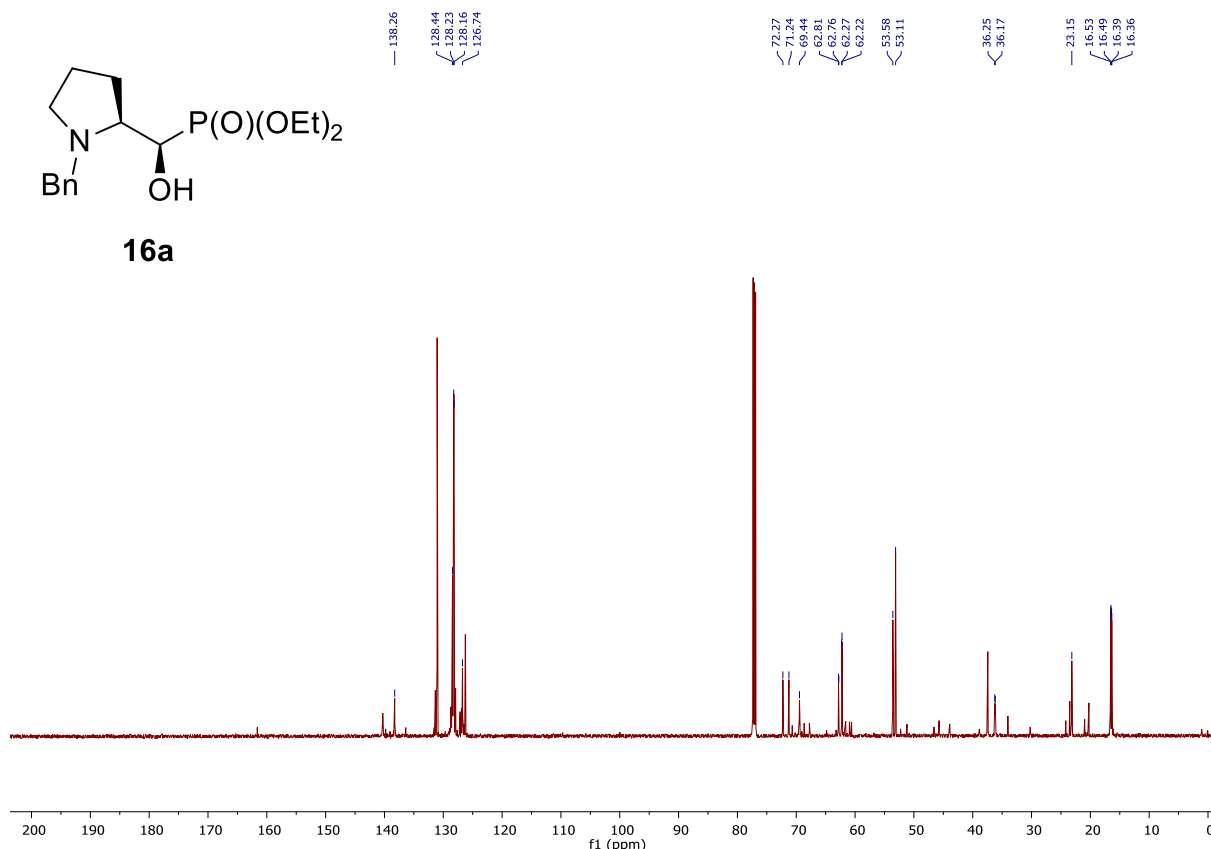

**<sup>13</sup>C NMR of 16a. Mixture of 16a and 16b [10.8:1, d.r.]**

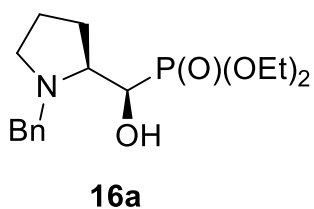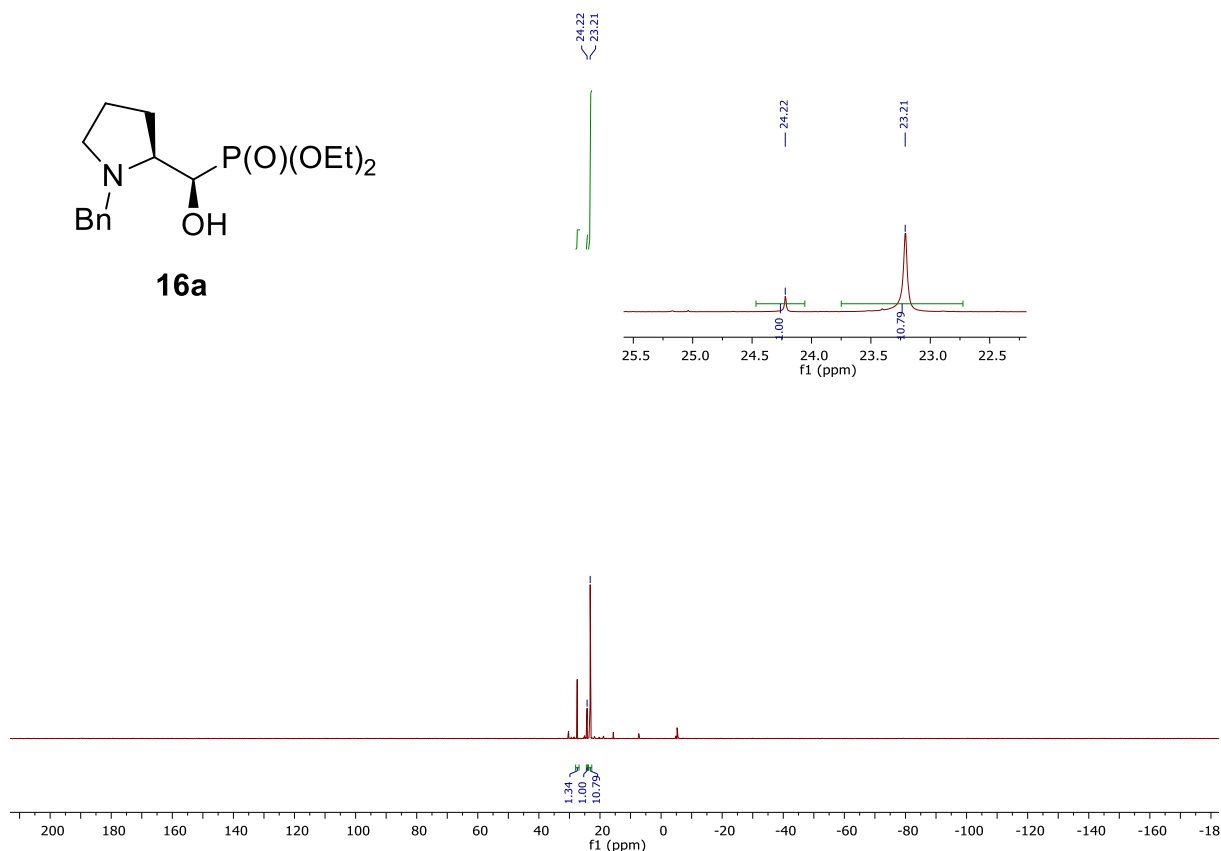

**<sup>31</sup>P{<sup>1</sup>H} NMR of 16a. Mixture of 16a and 16b [10.8:1, d.r.]**

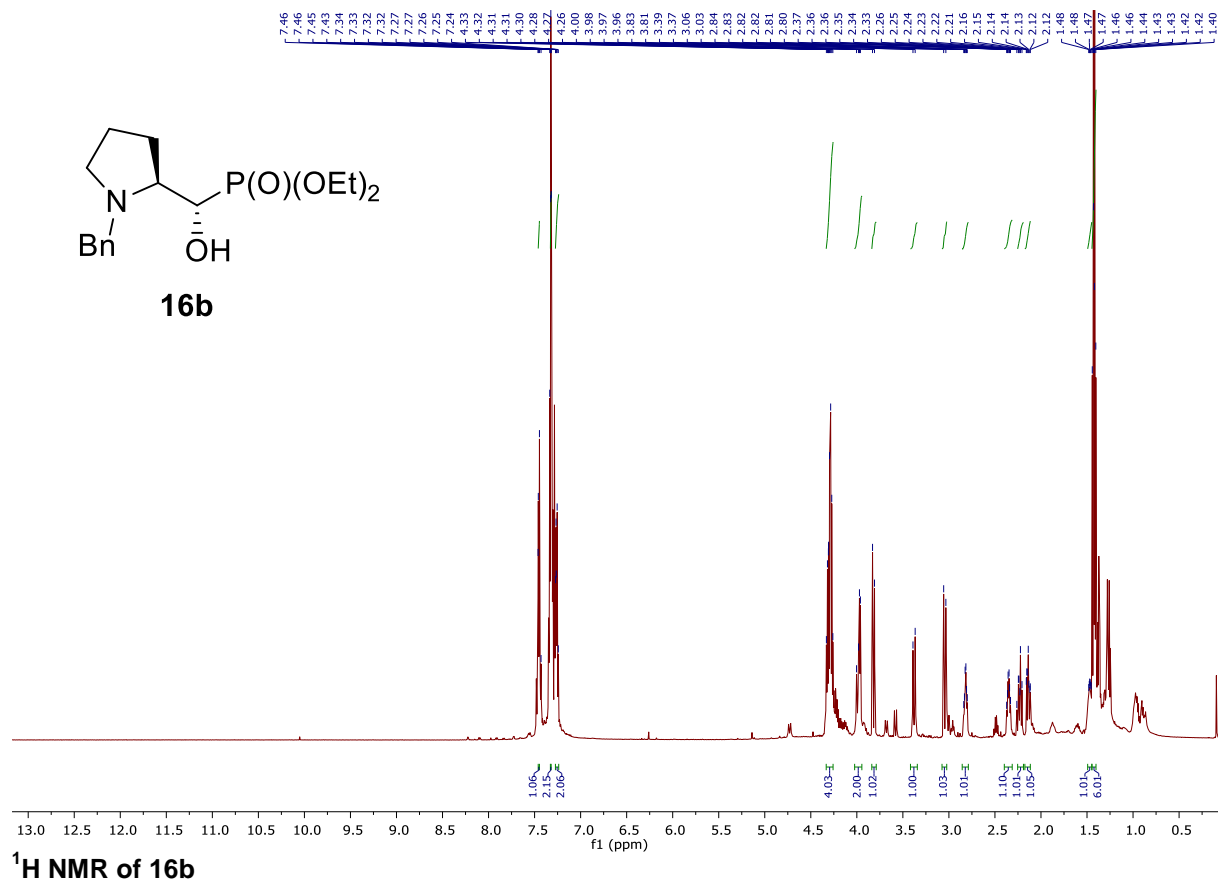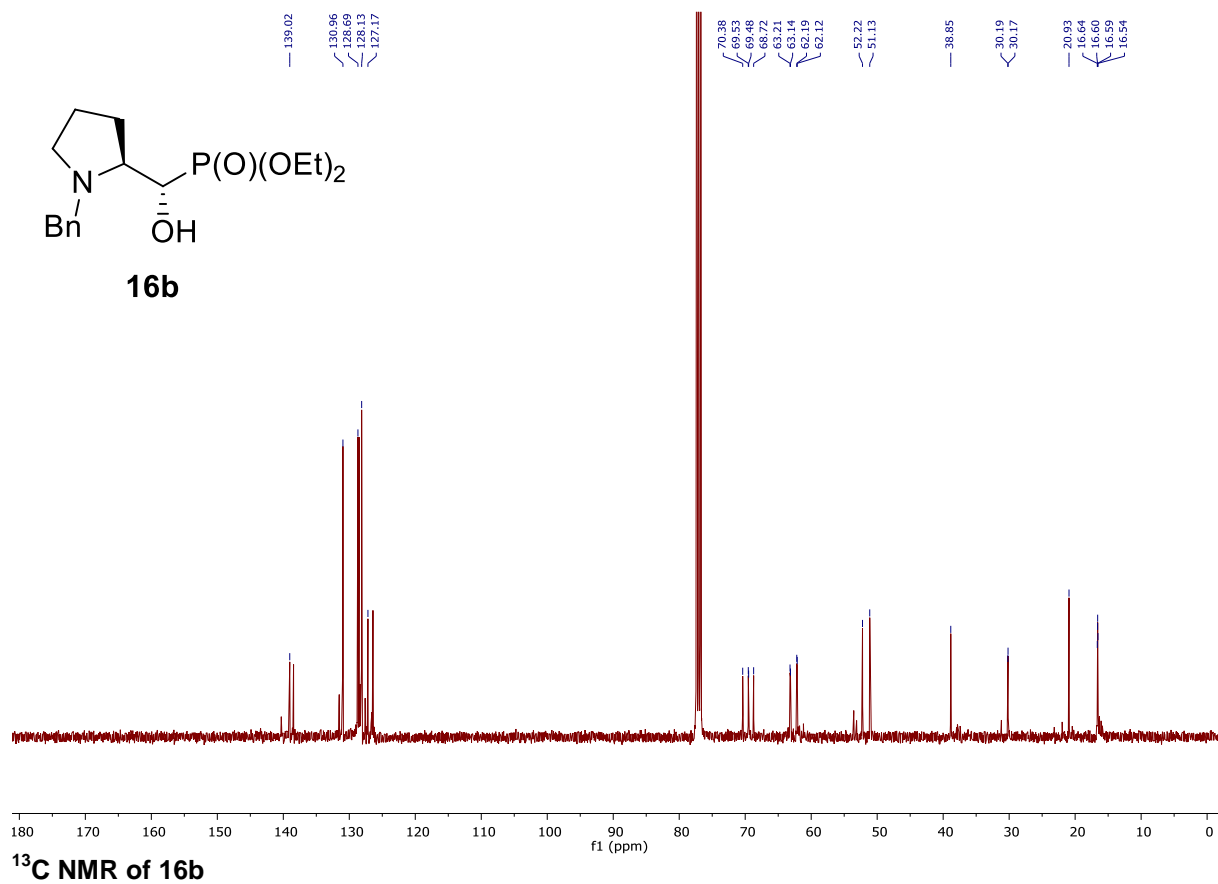

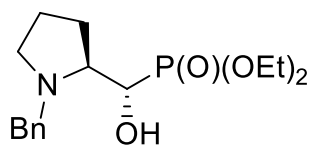

**16b**

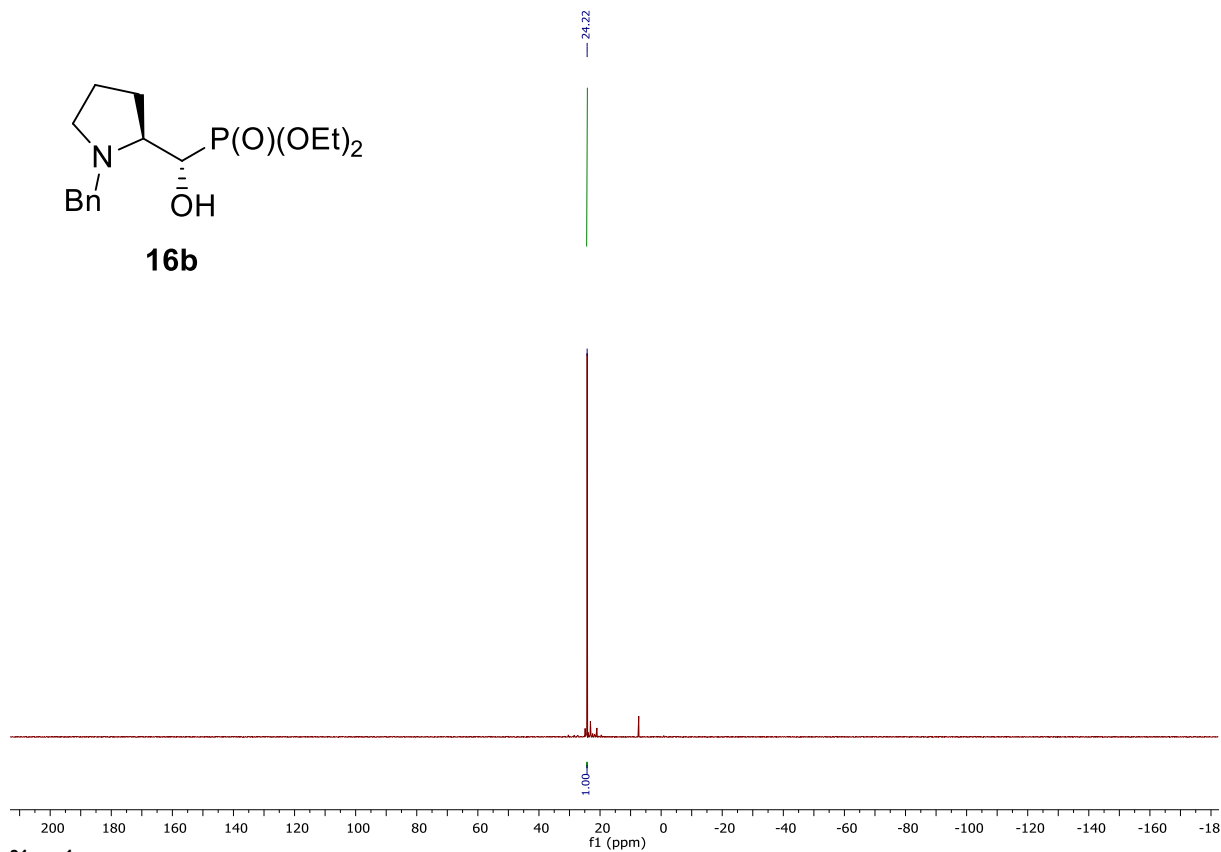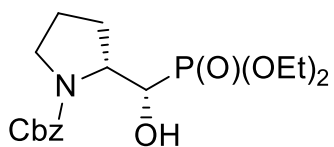

**18a**

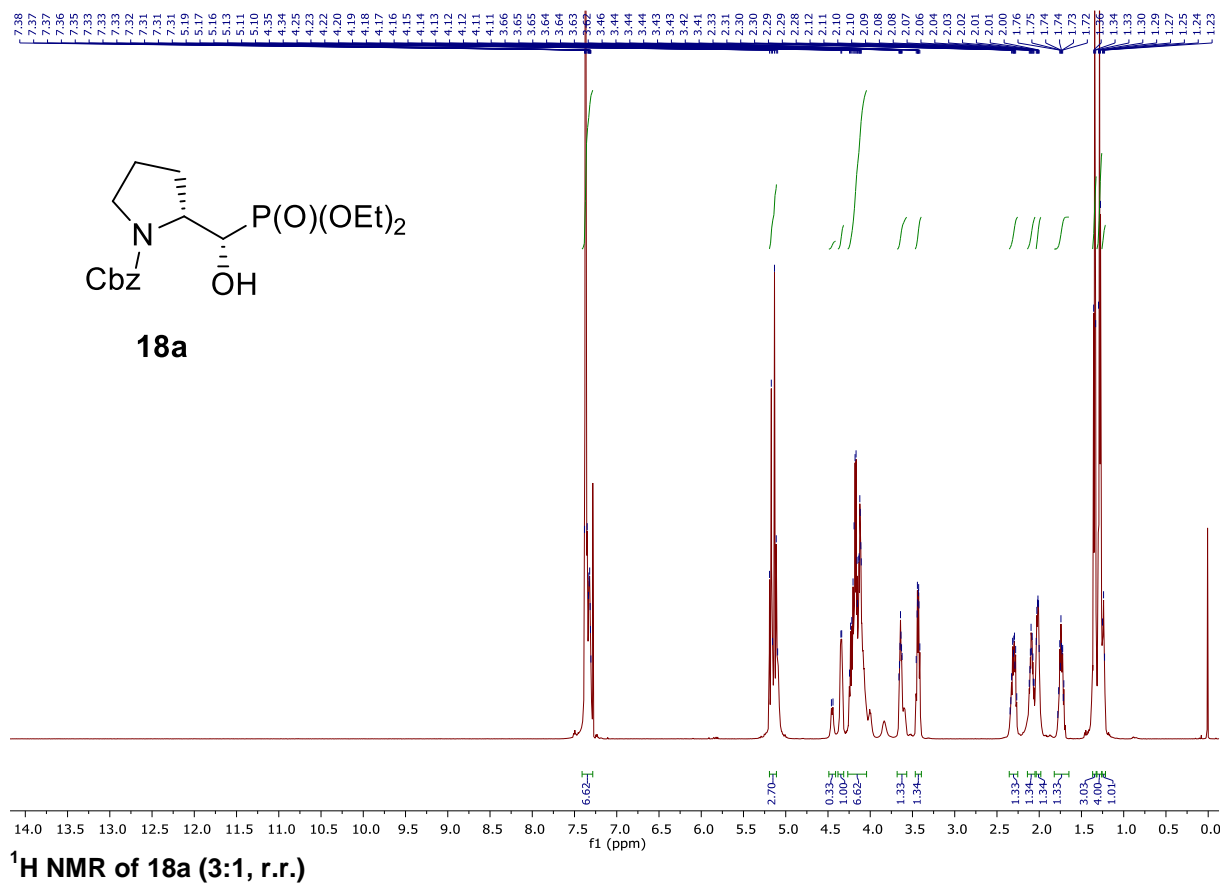

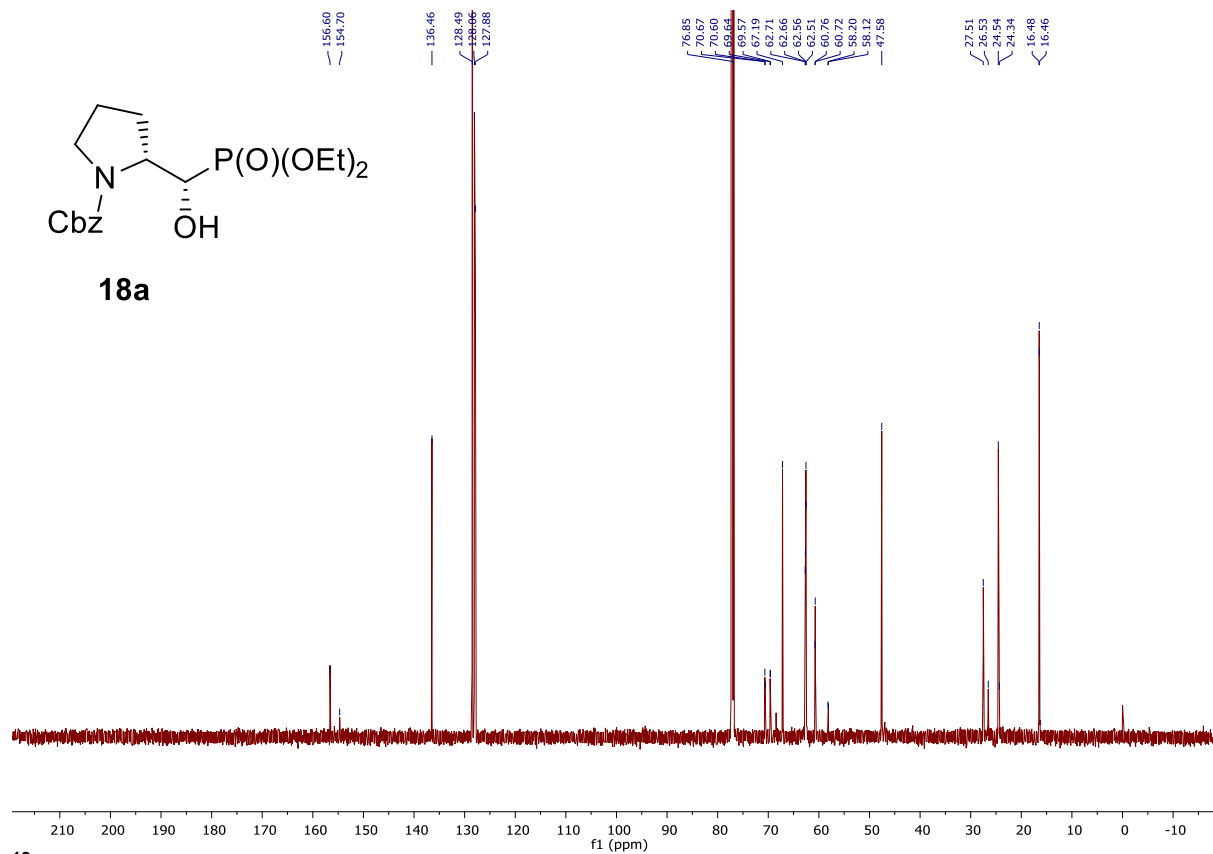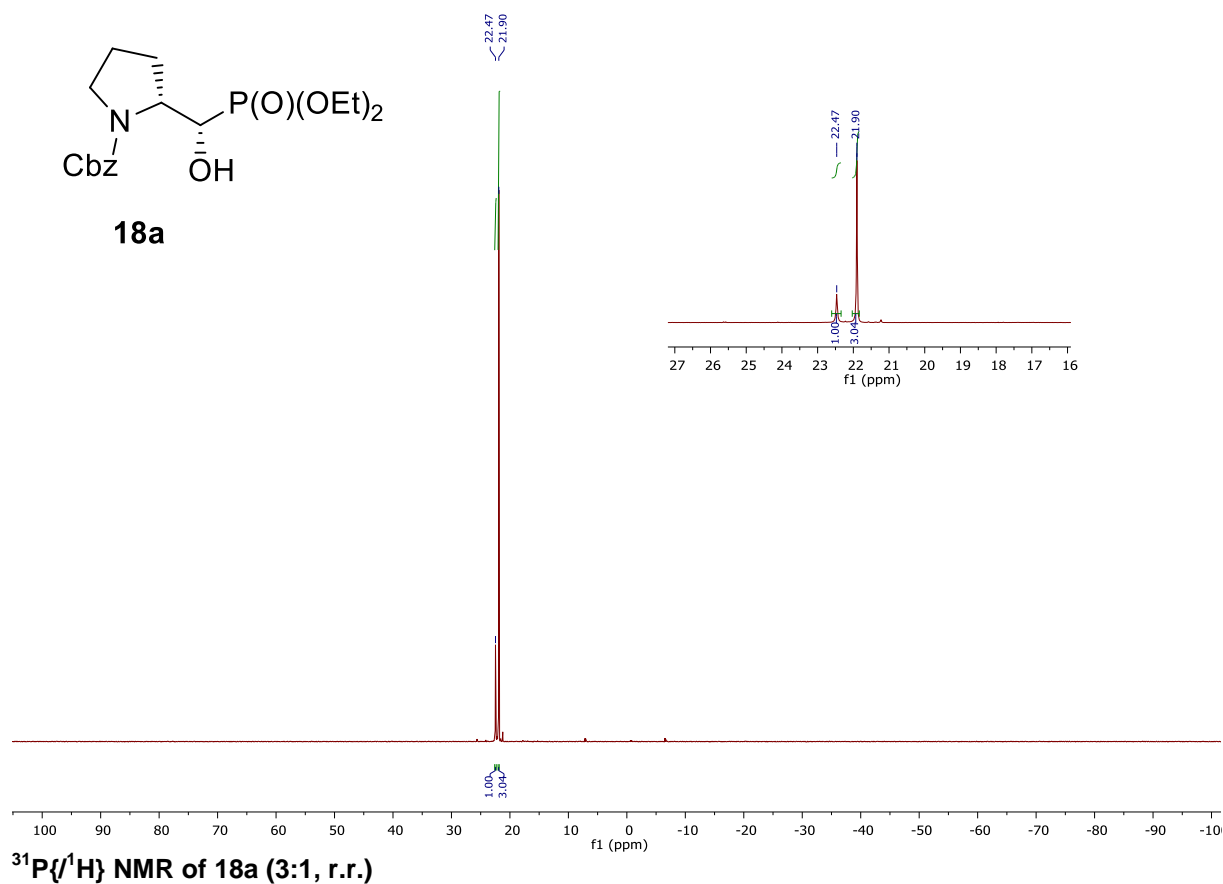

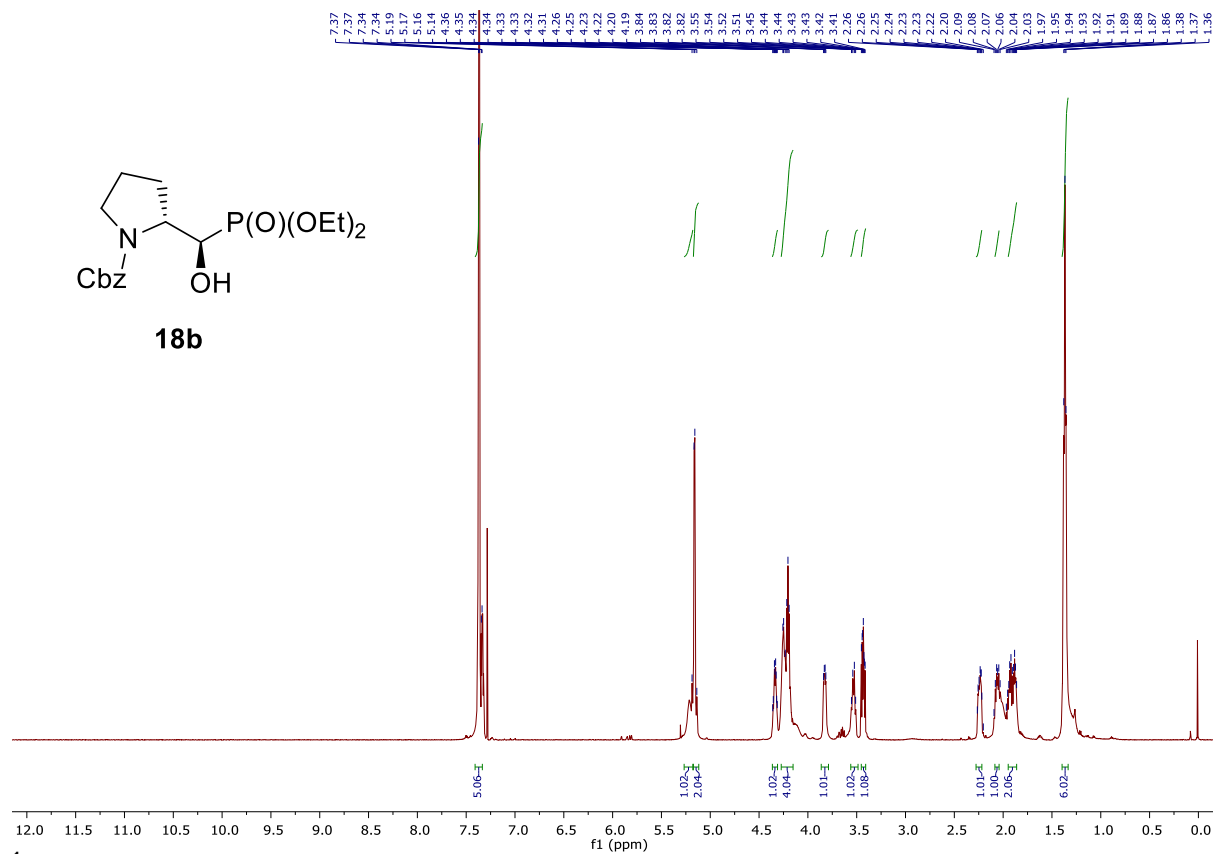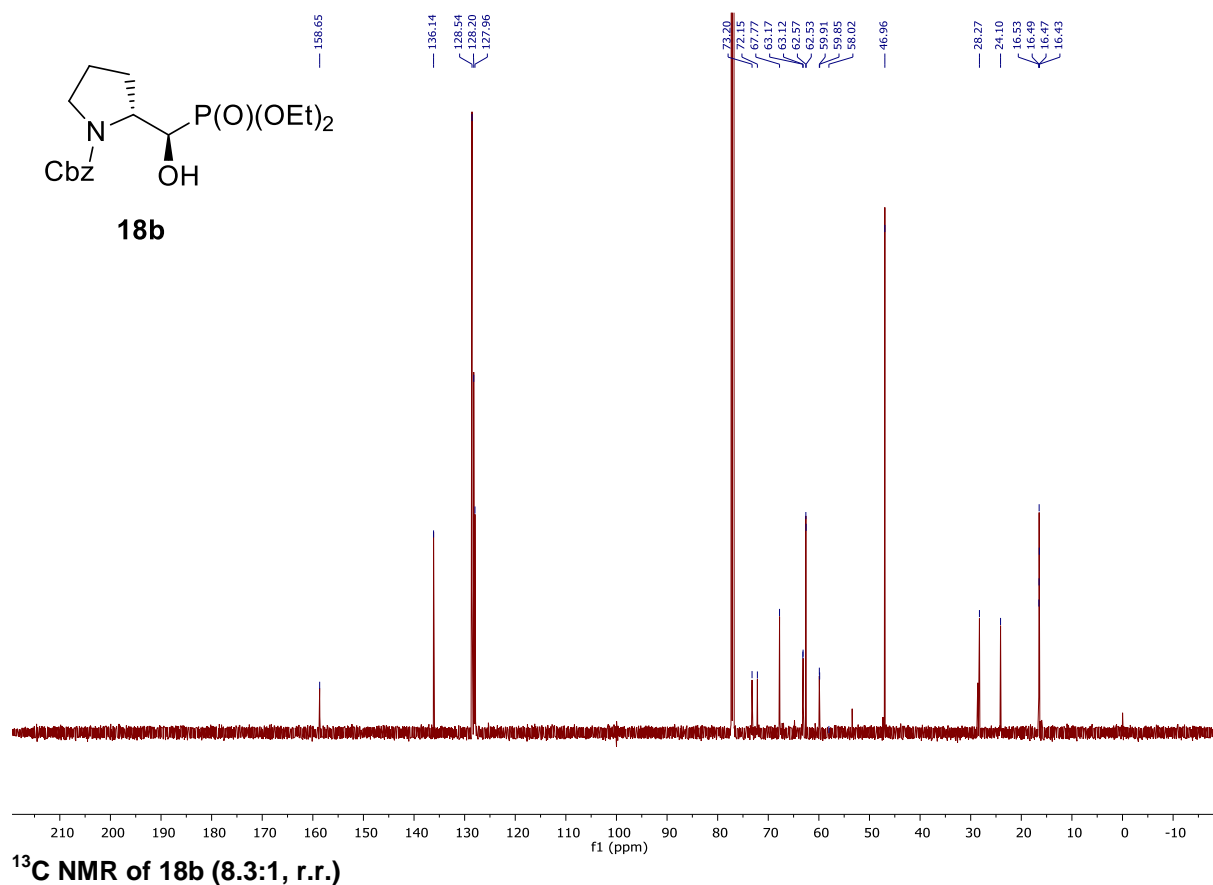



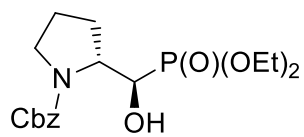

**18b**

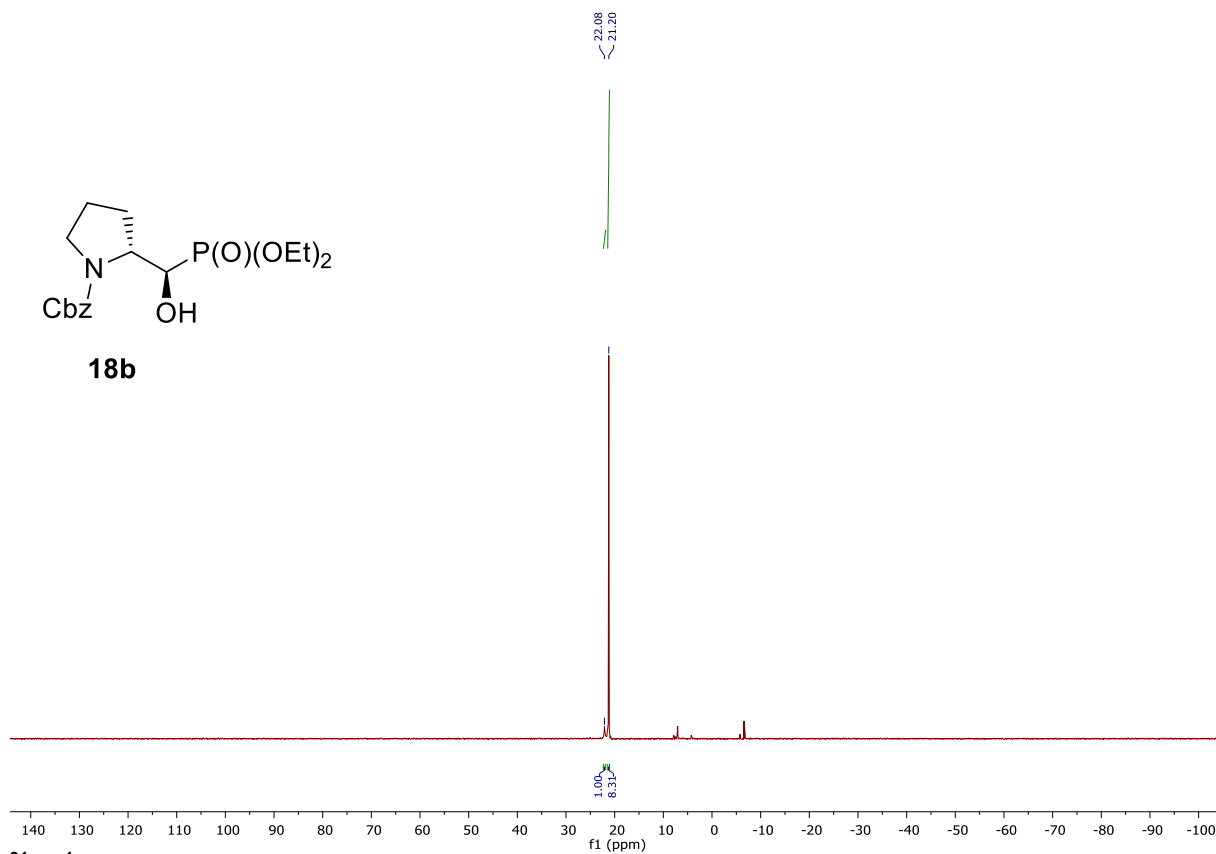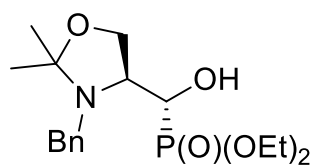

**19a**

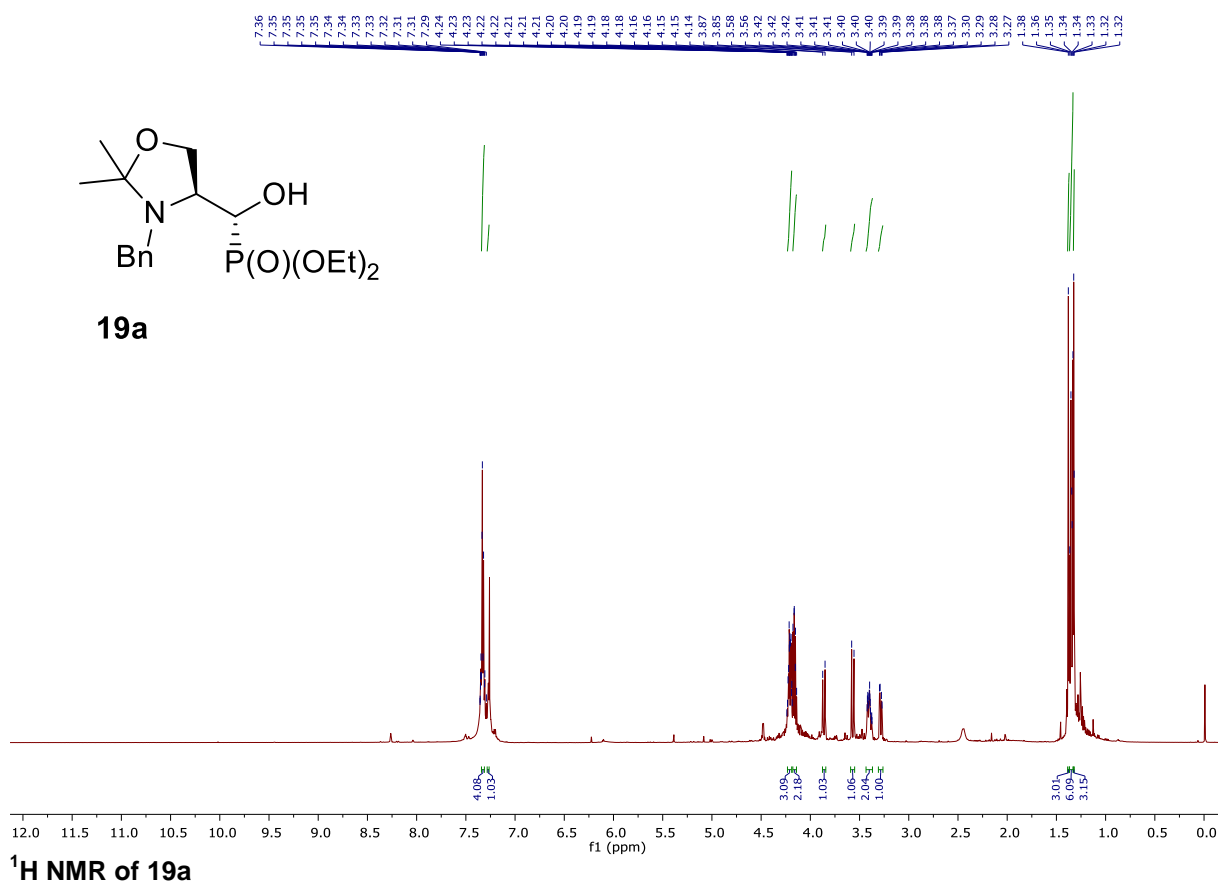

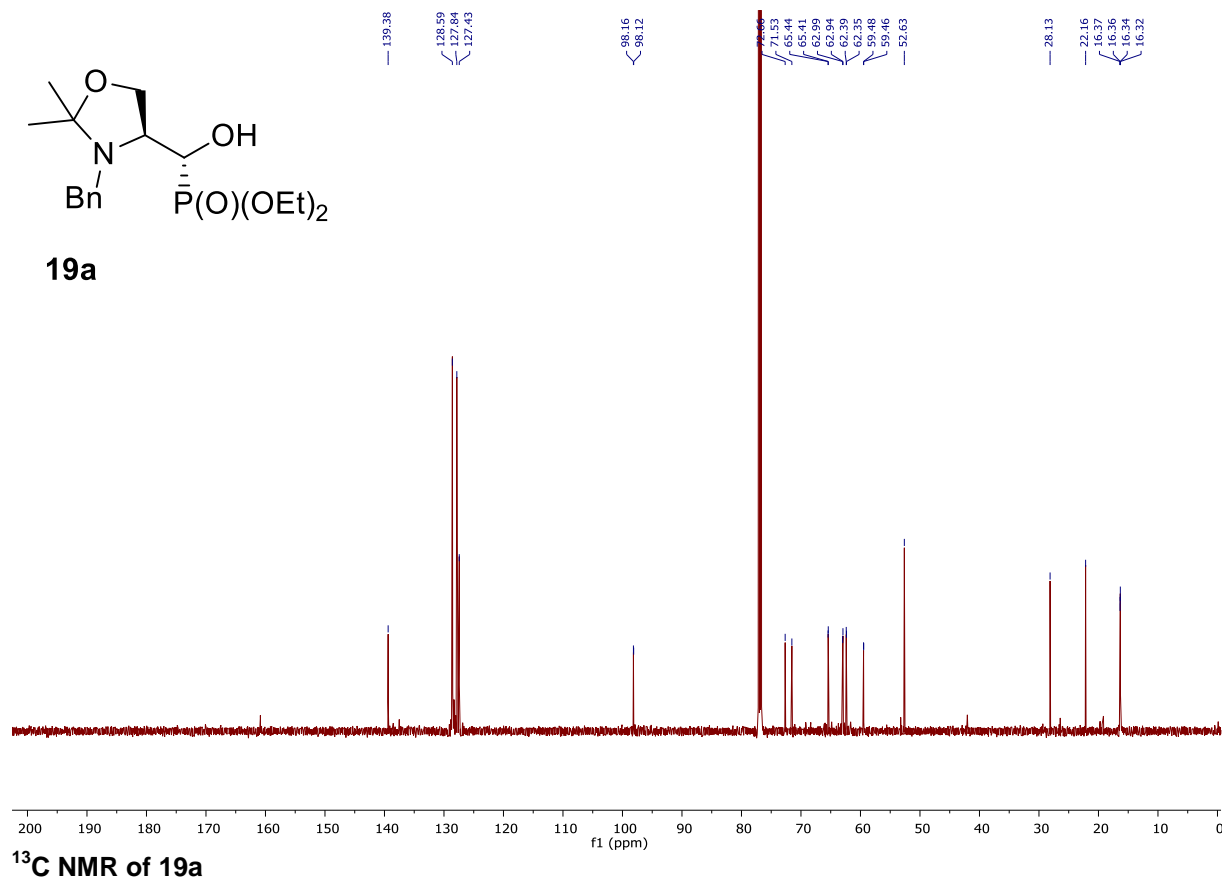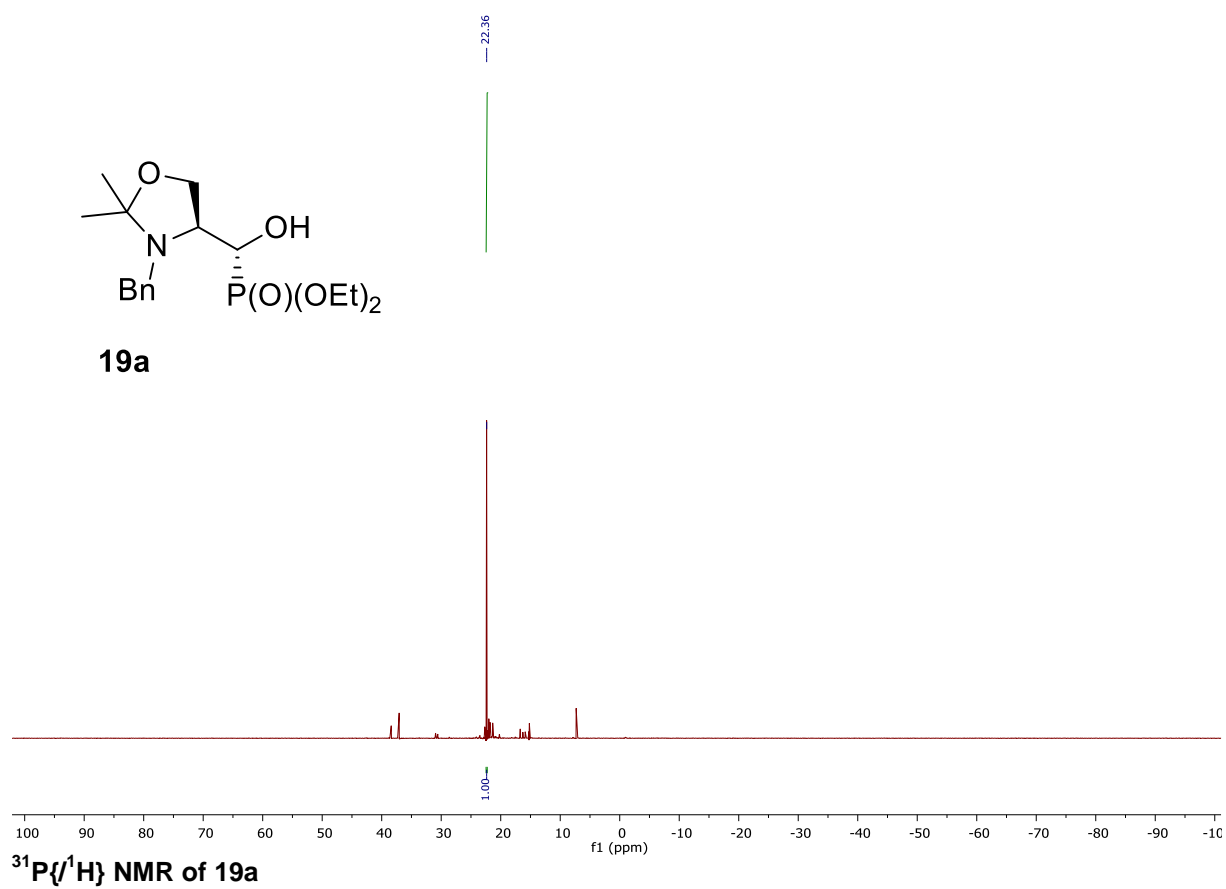

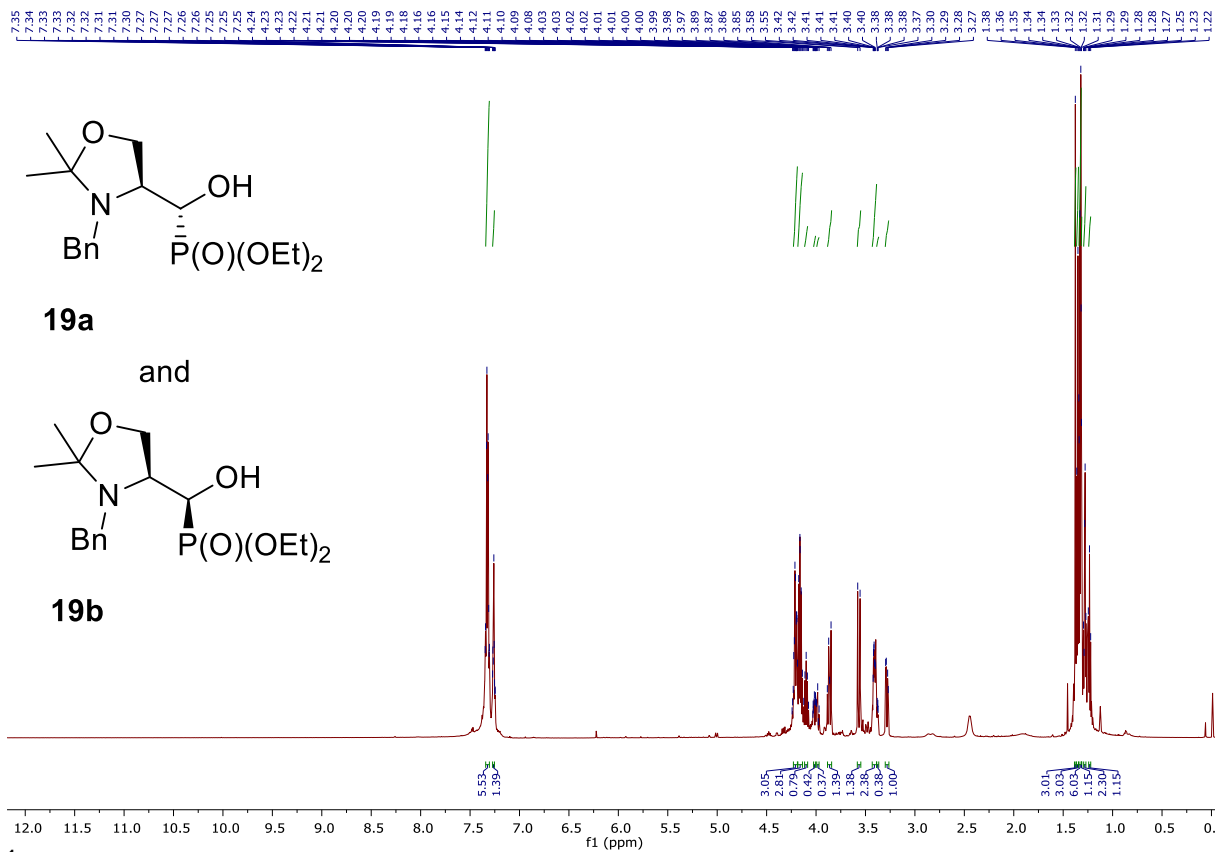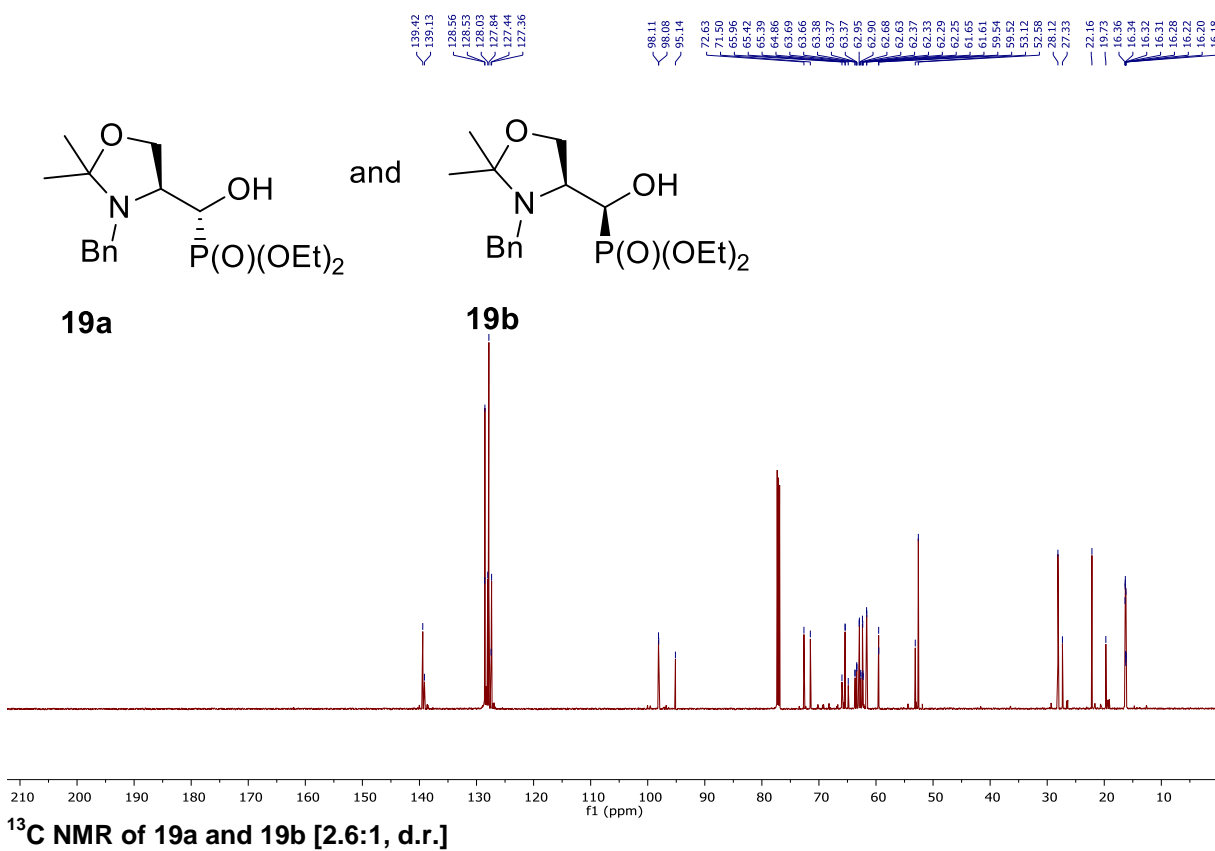

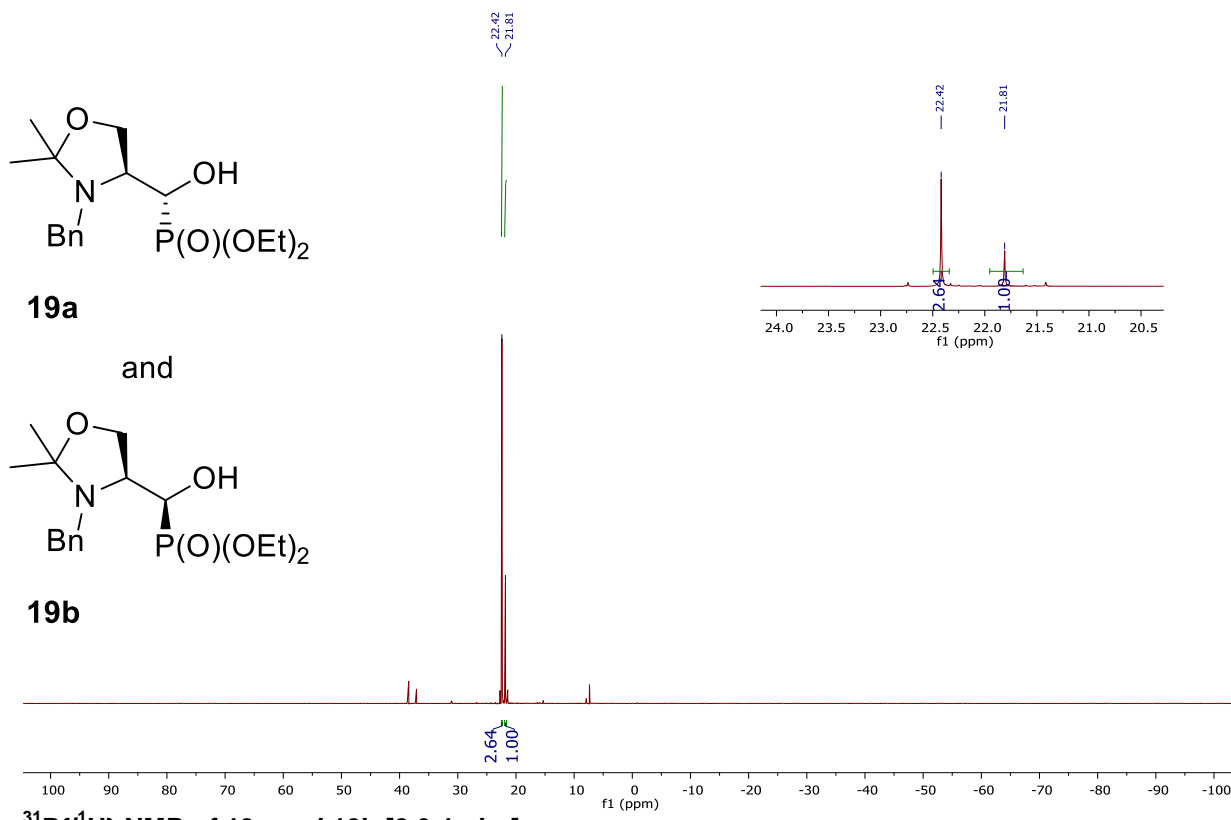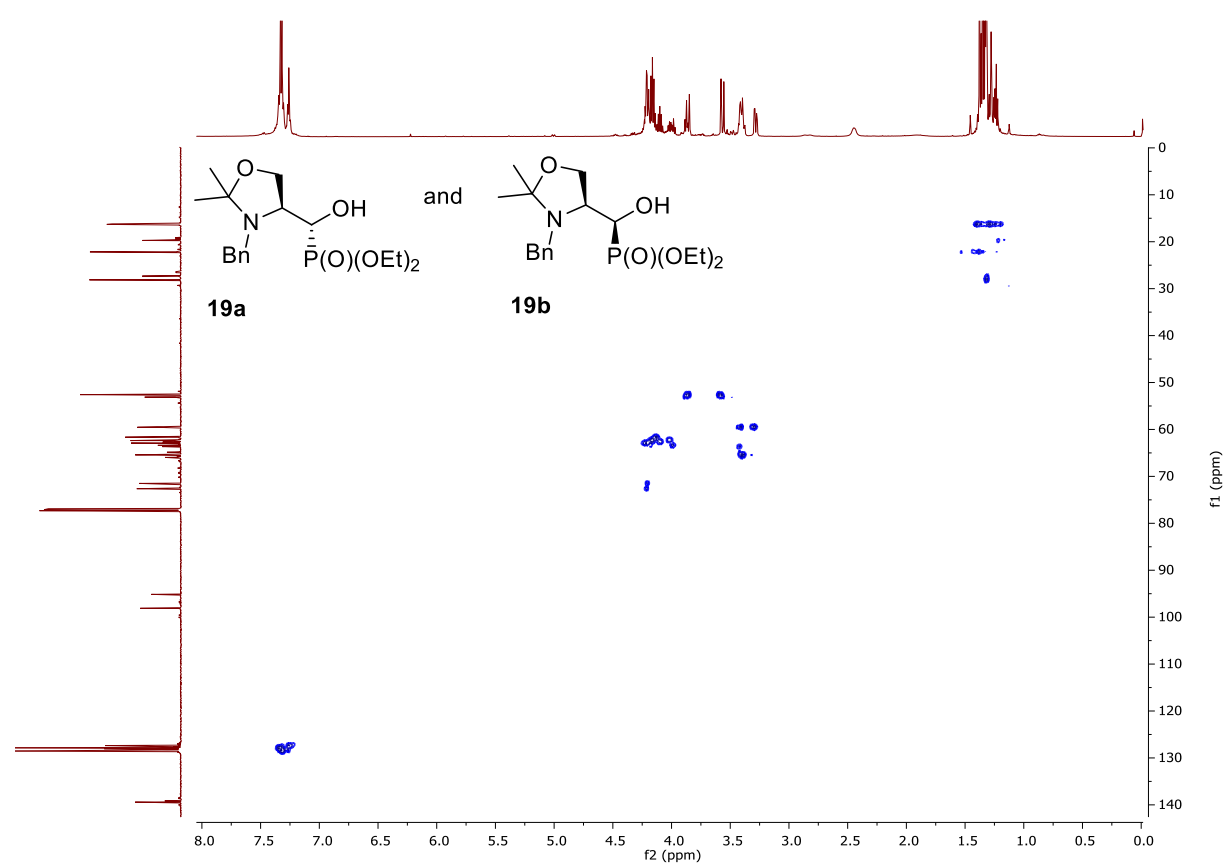

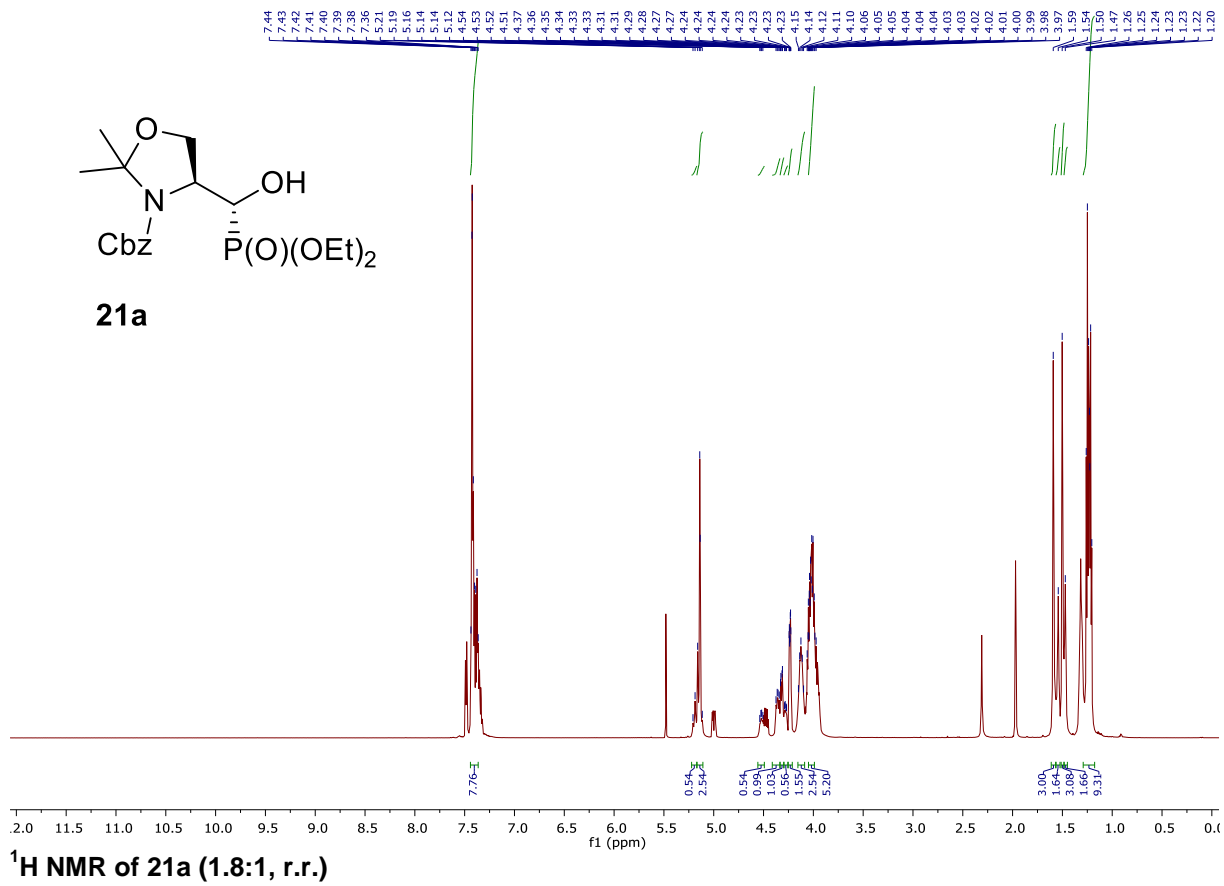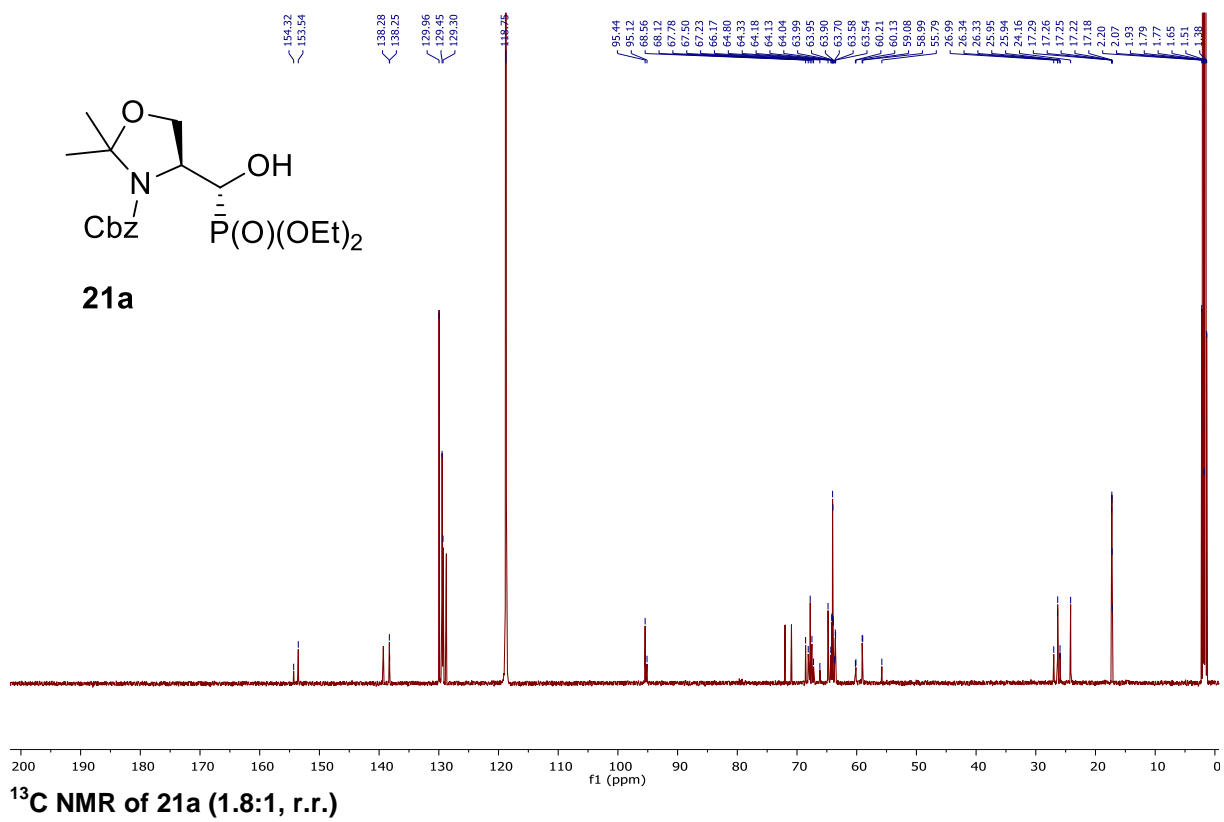

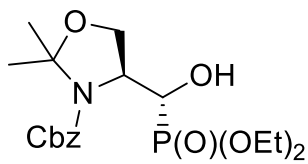

21a

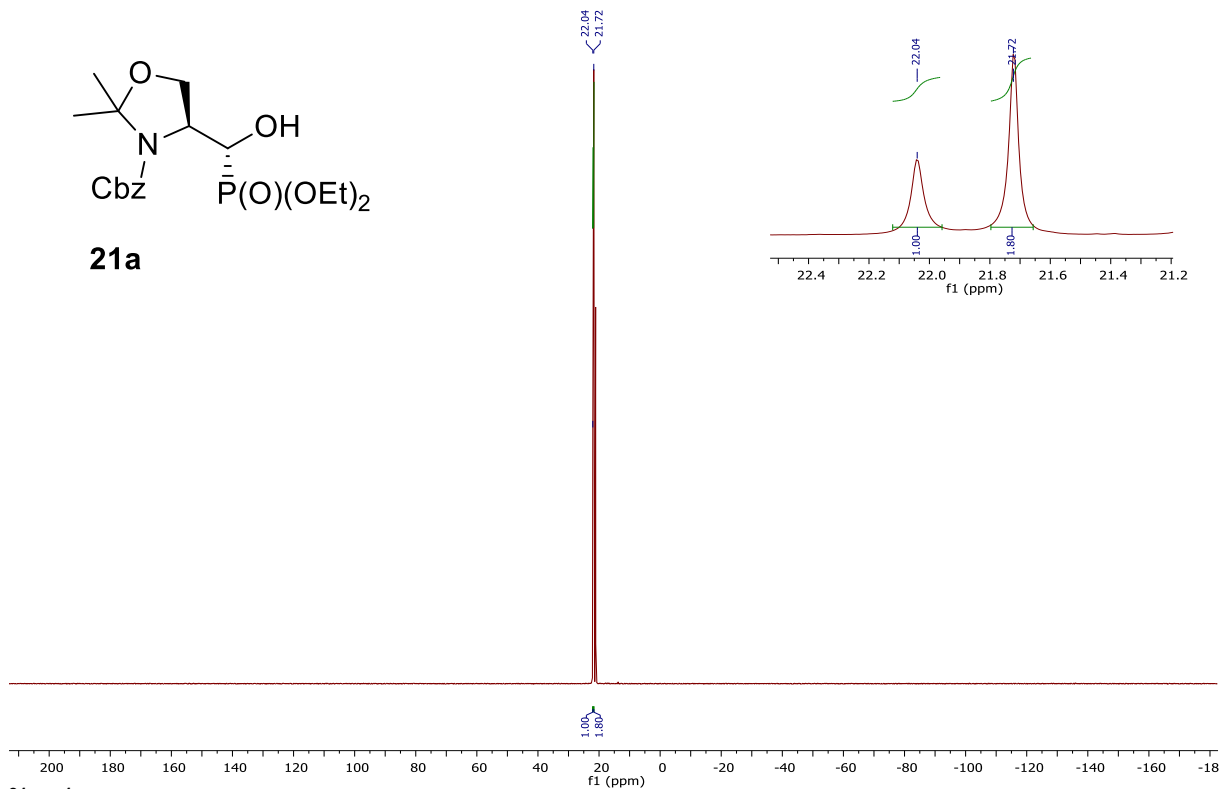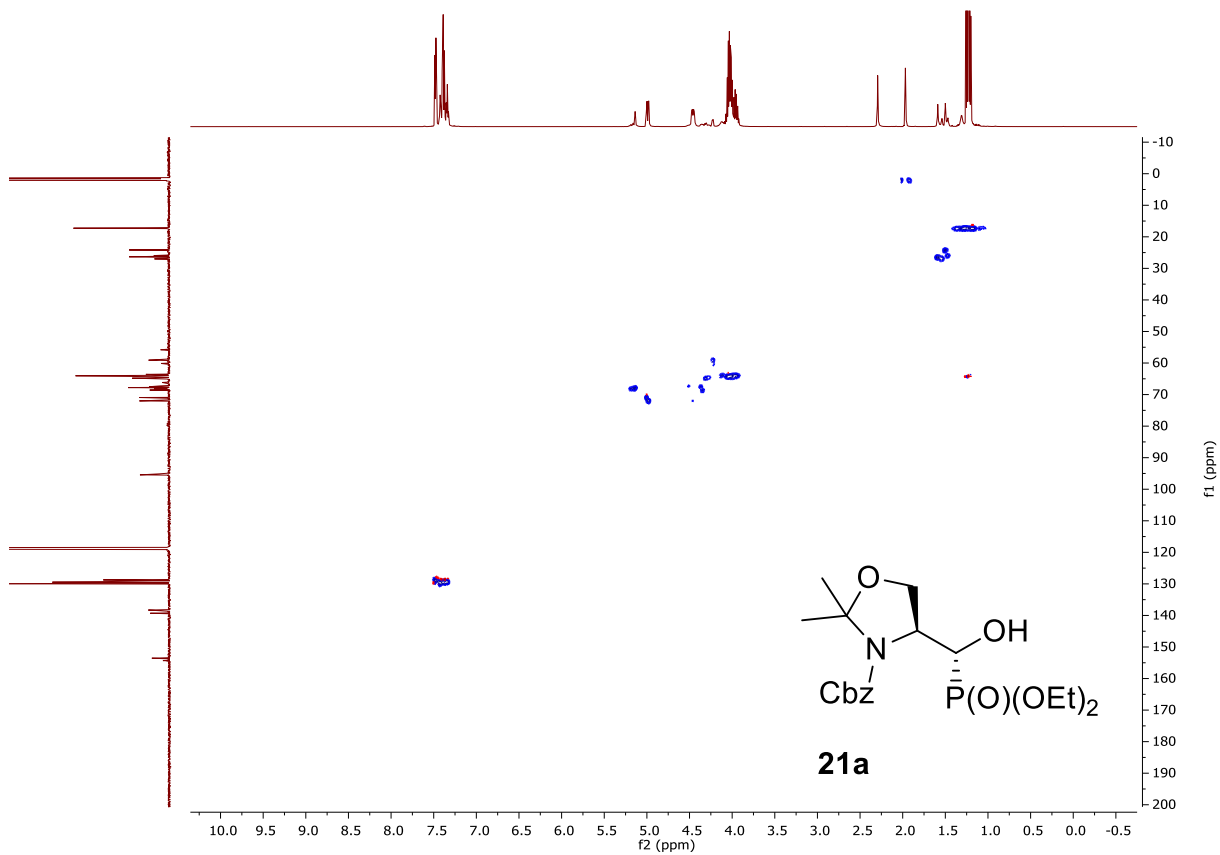

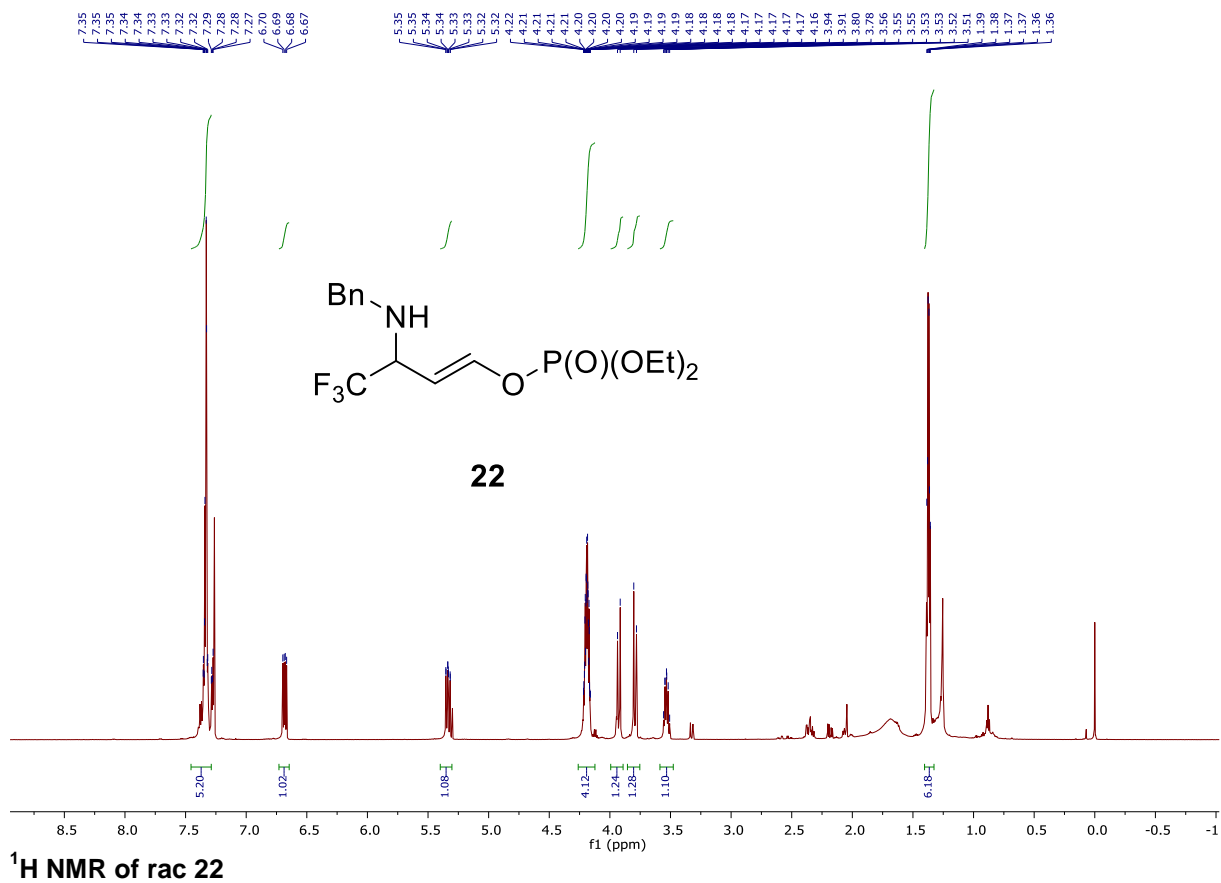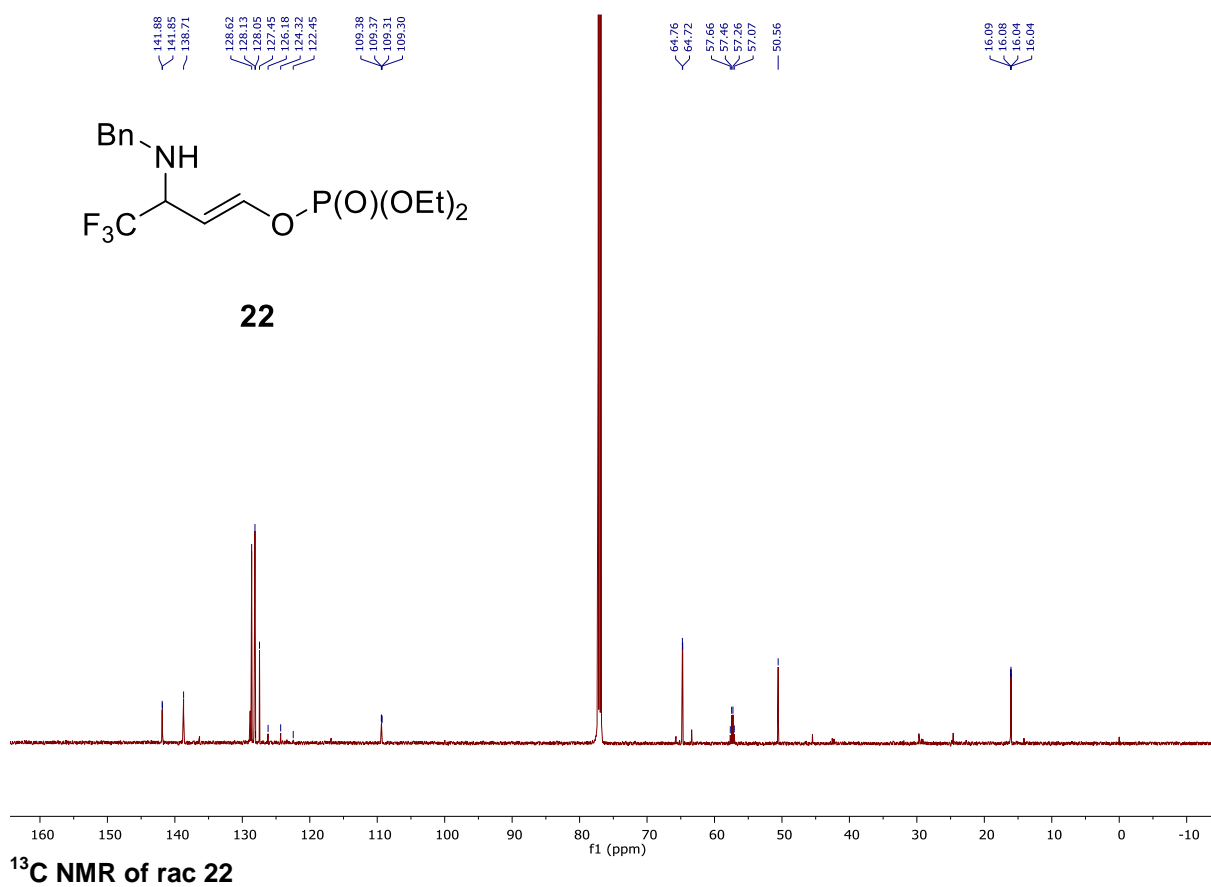

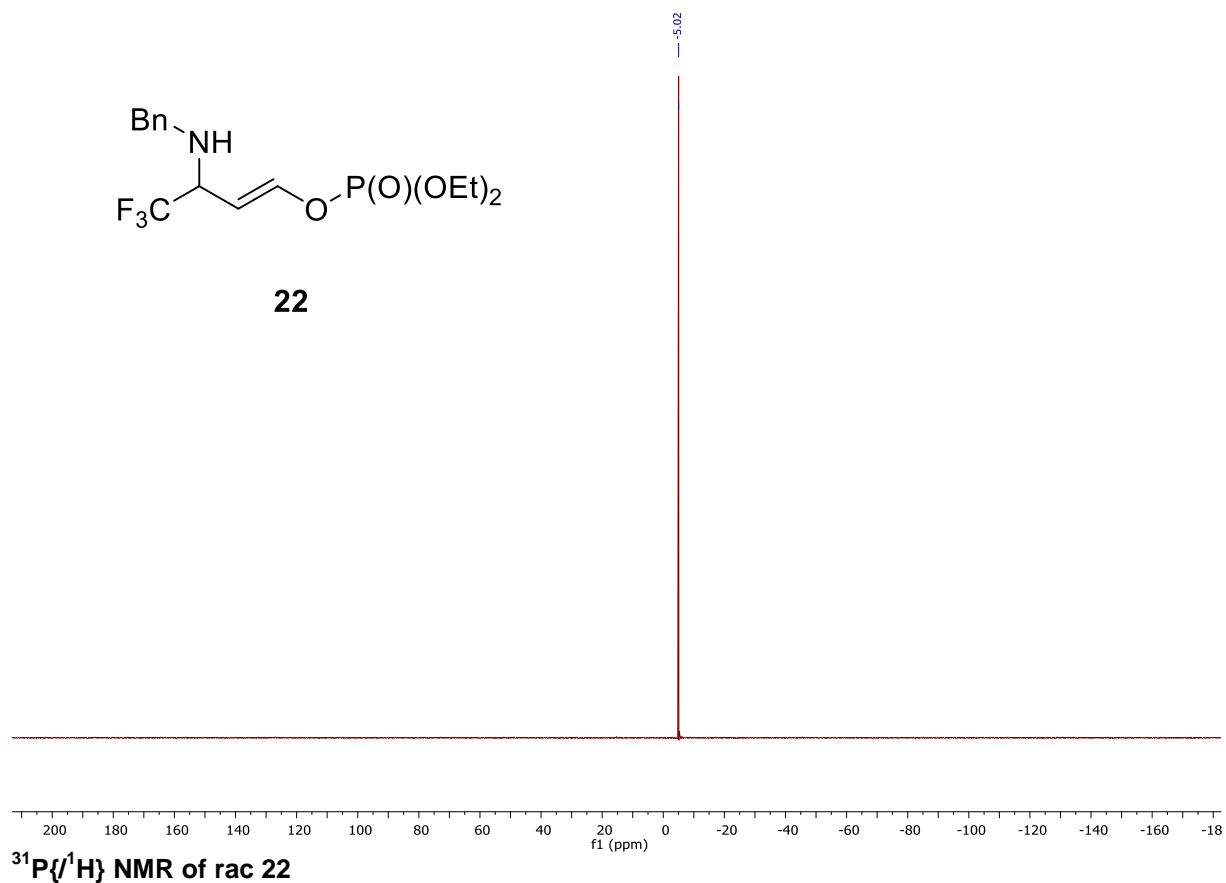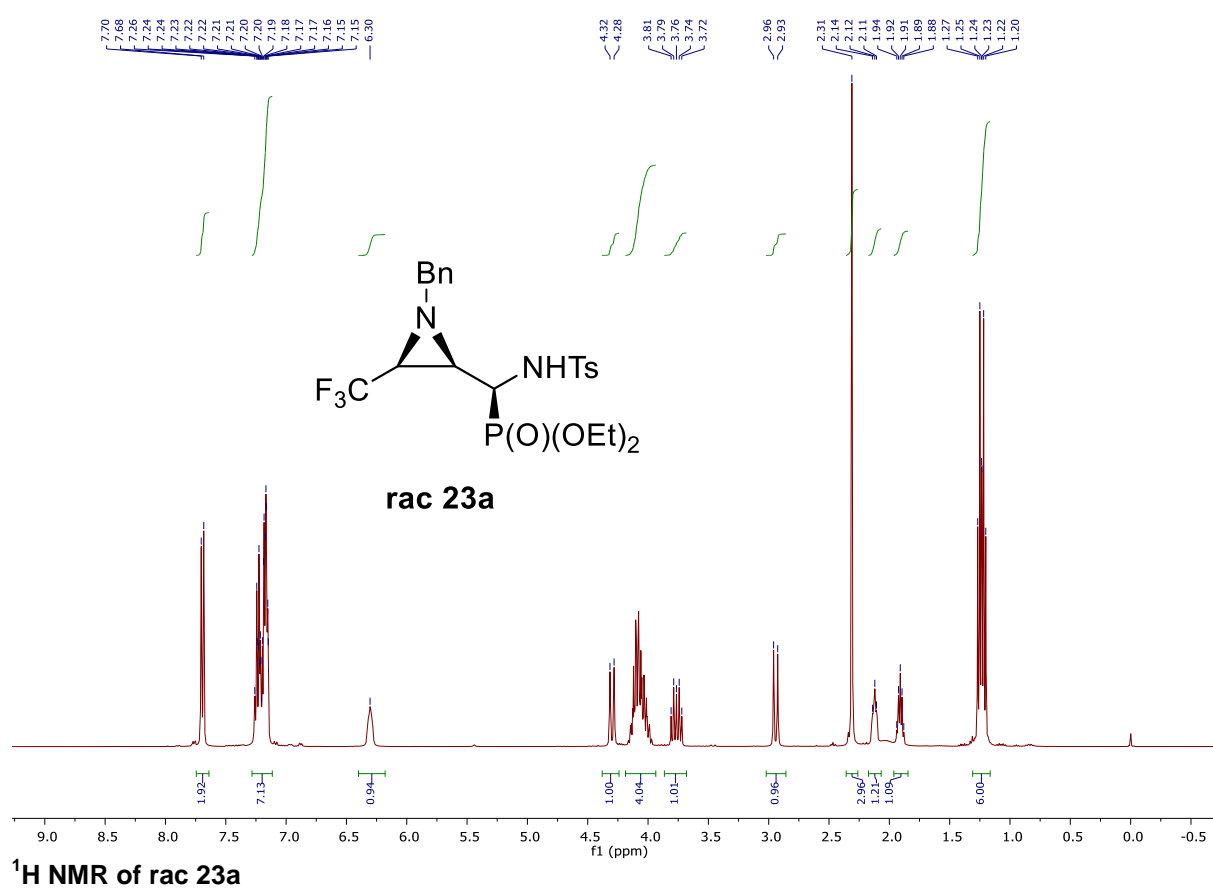



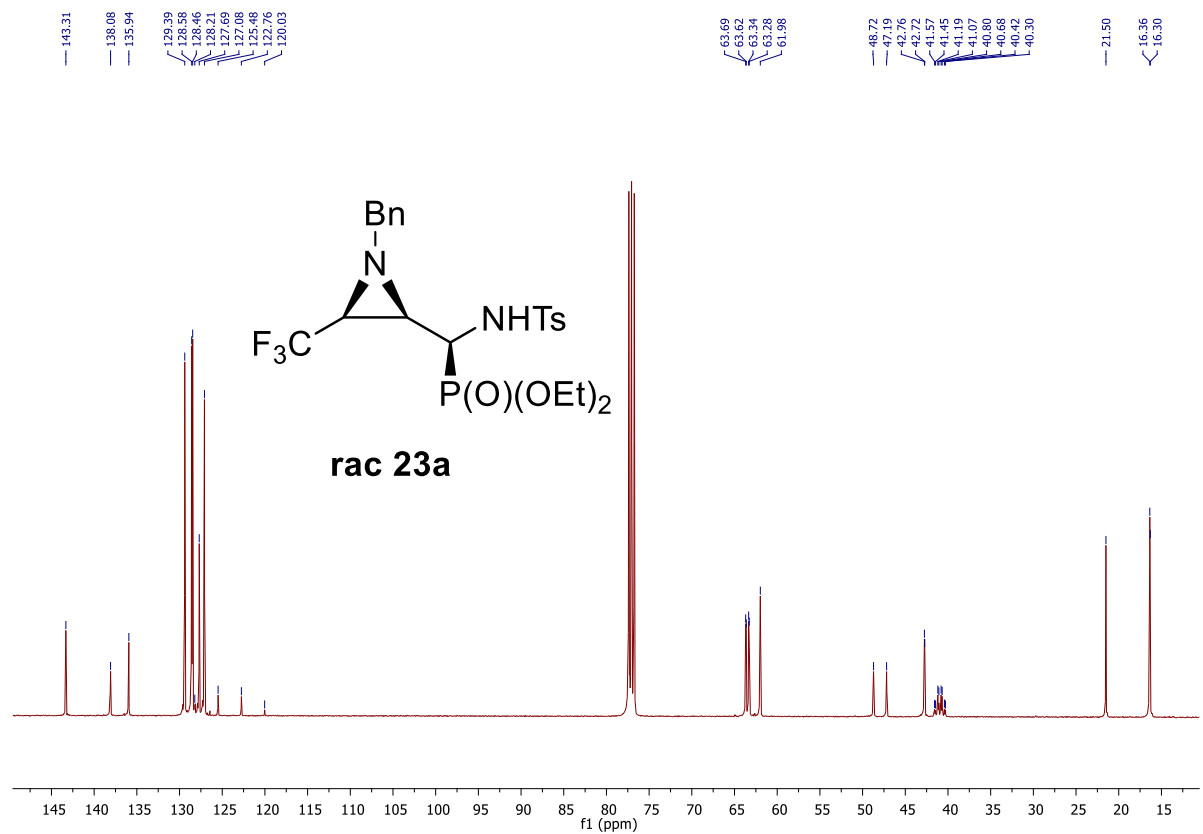

<sup>13</sup>C NMR of rac 23a

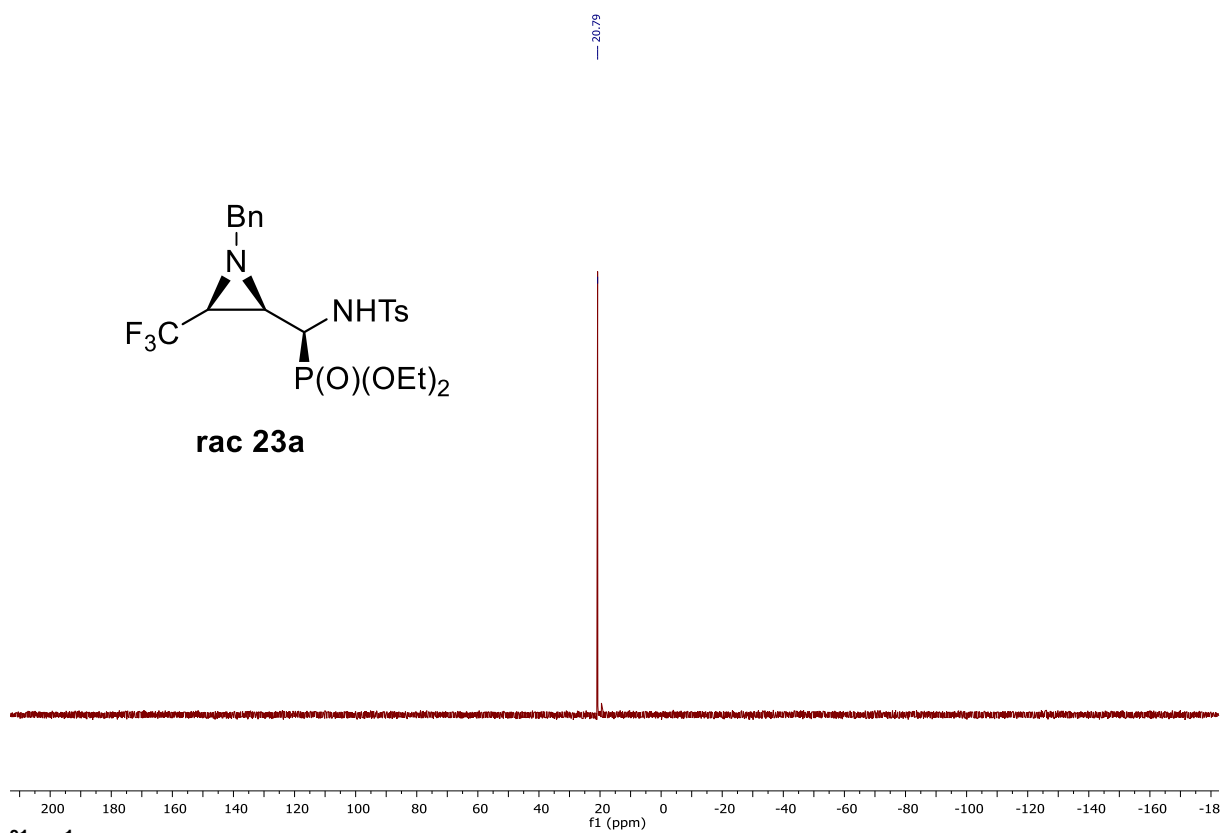

<sup>31</sup>P{<sup>1</sup>H} NMR of rac 23a

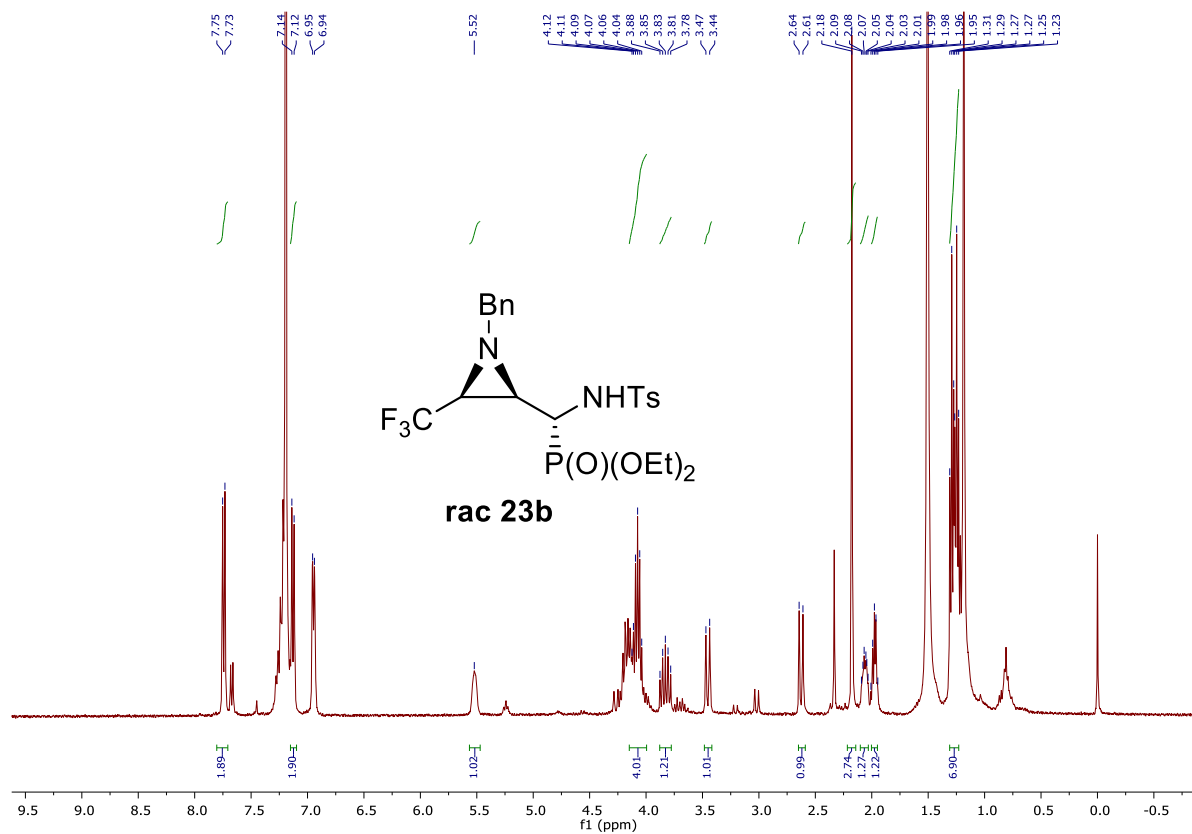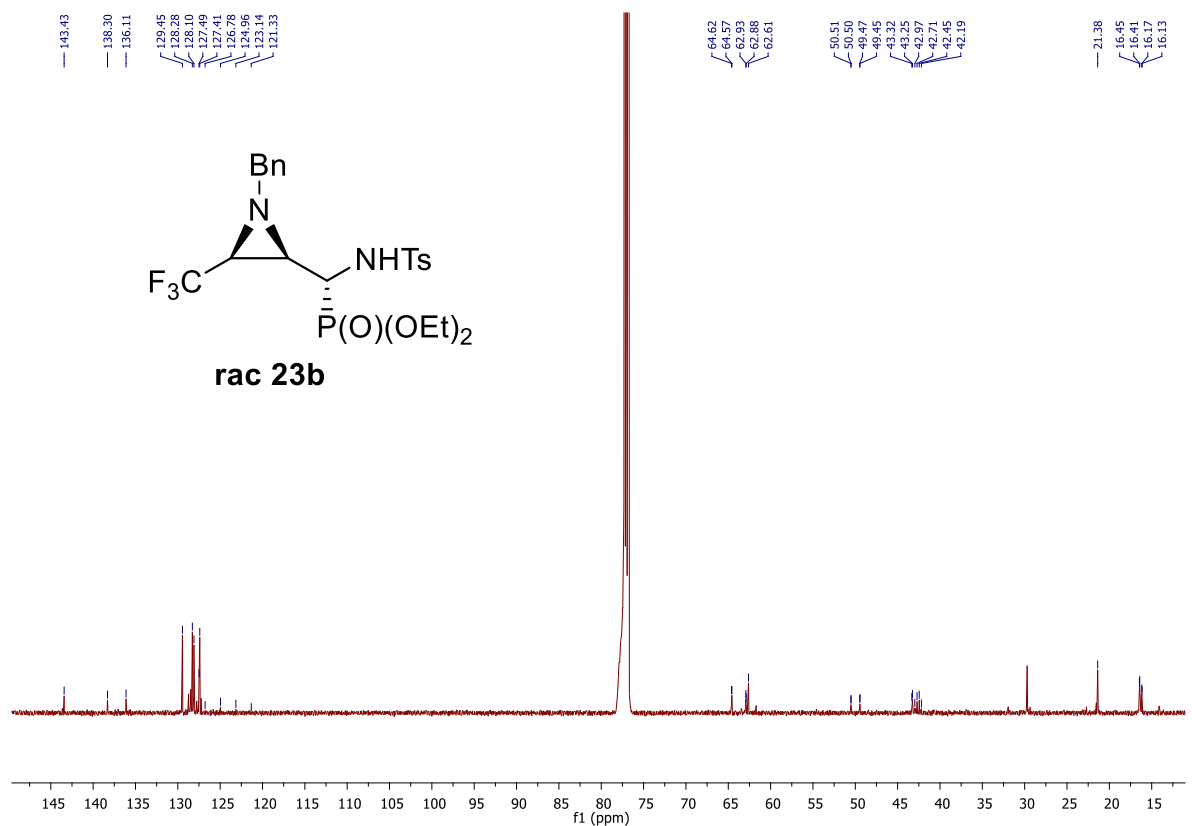

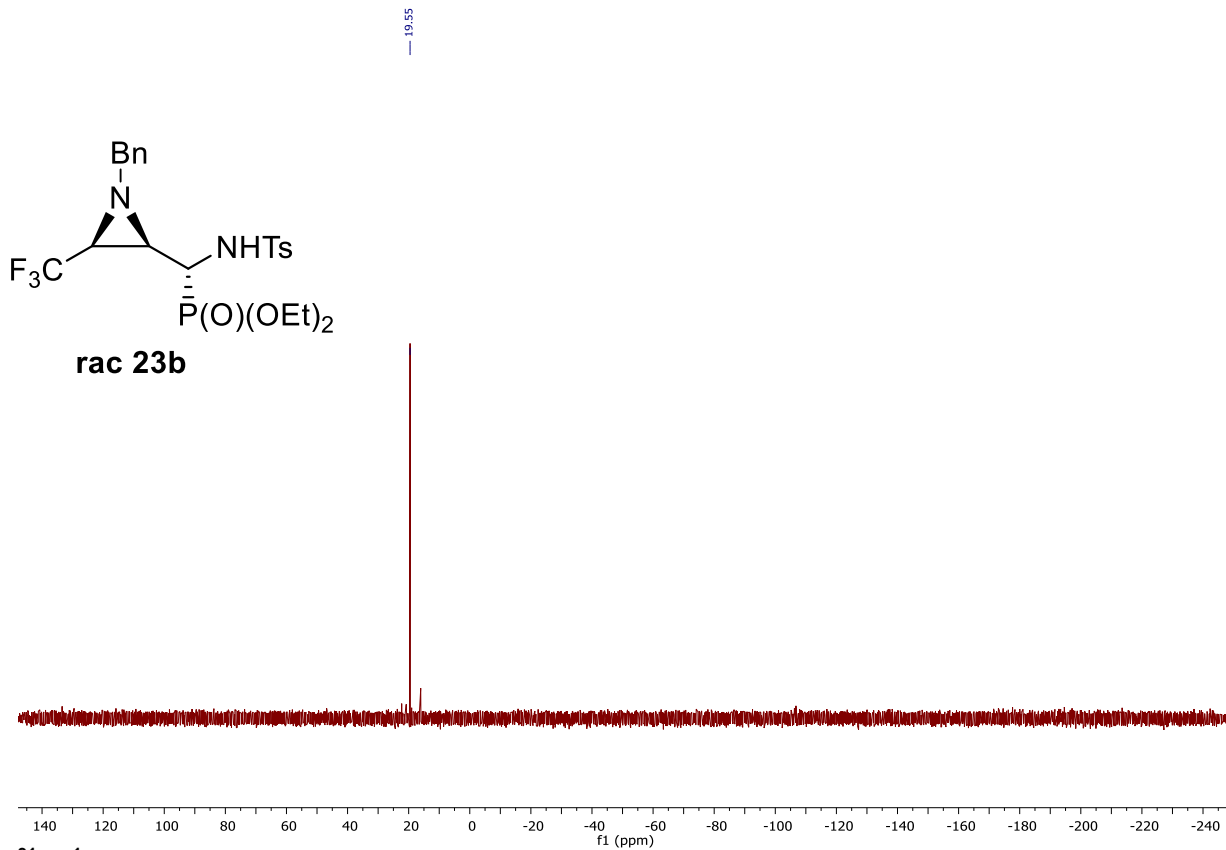

<sup>31</sup>P{<sup>1</sup>H} NMR of rac 23b

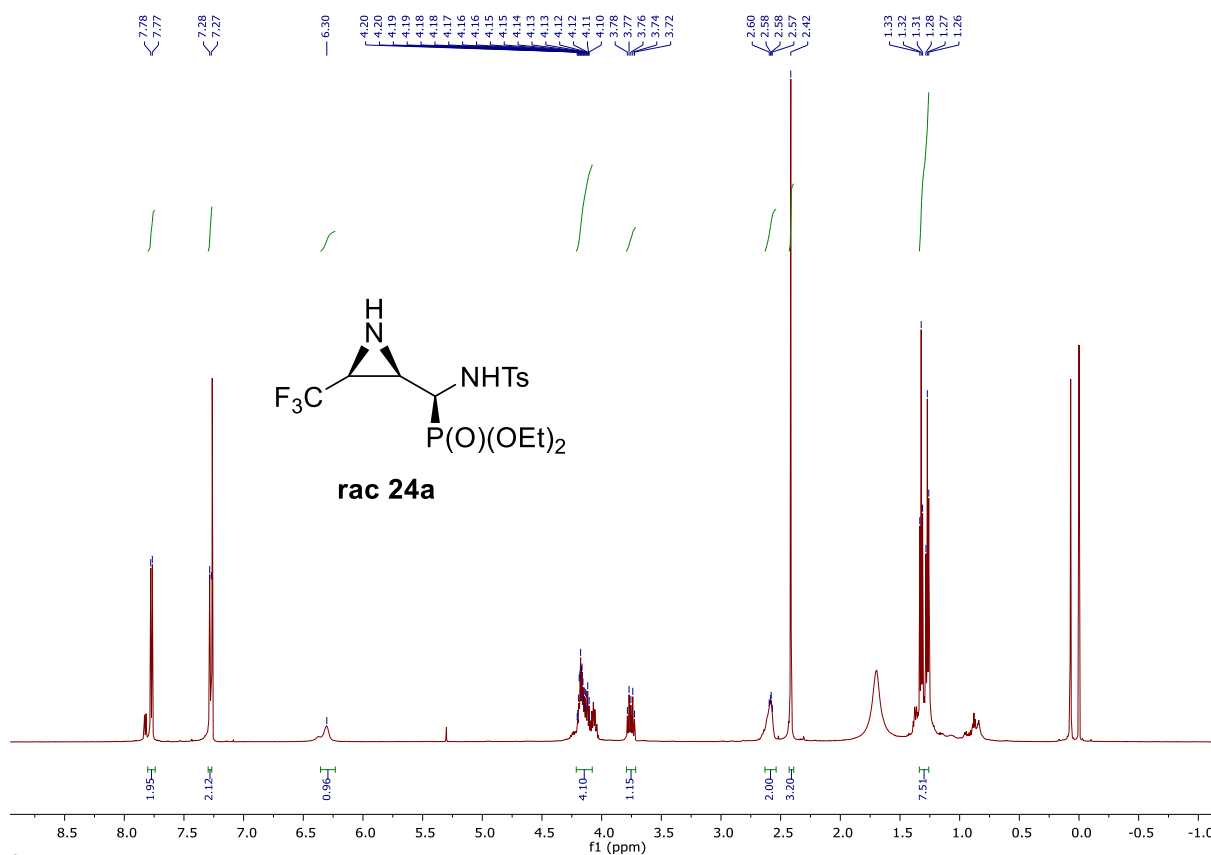

<sup>1</sup>H NMR of rac 24a. Mixture of rac 24a and 24b [6:1, d.r.]

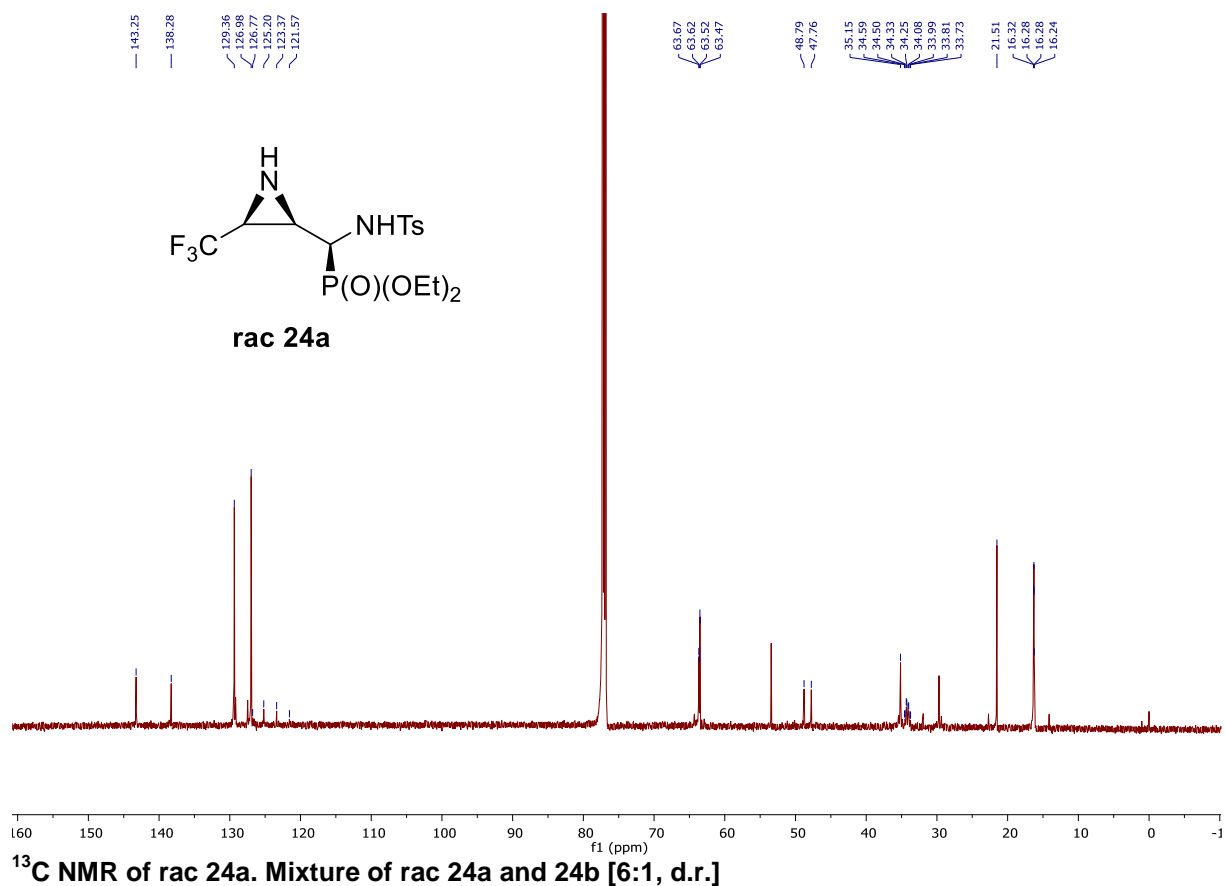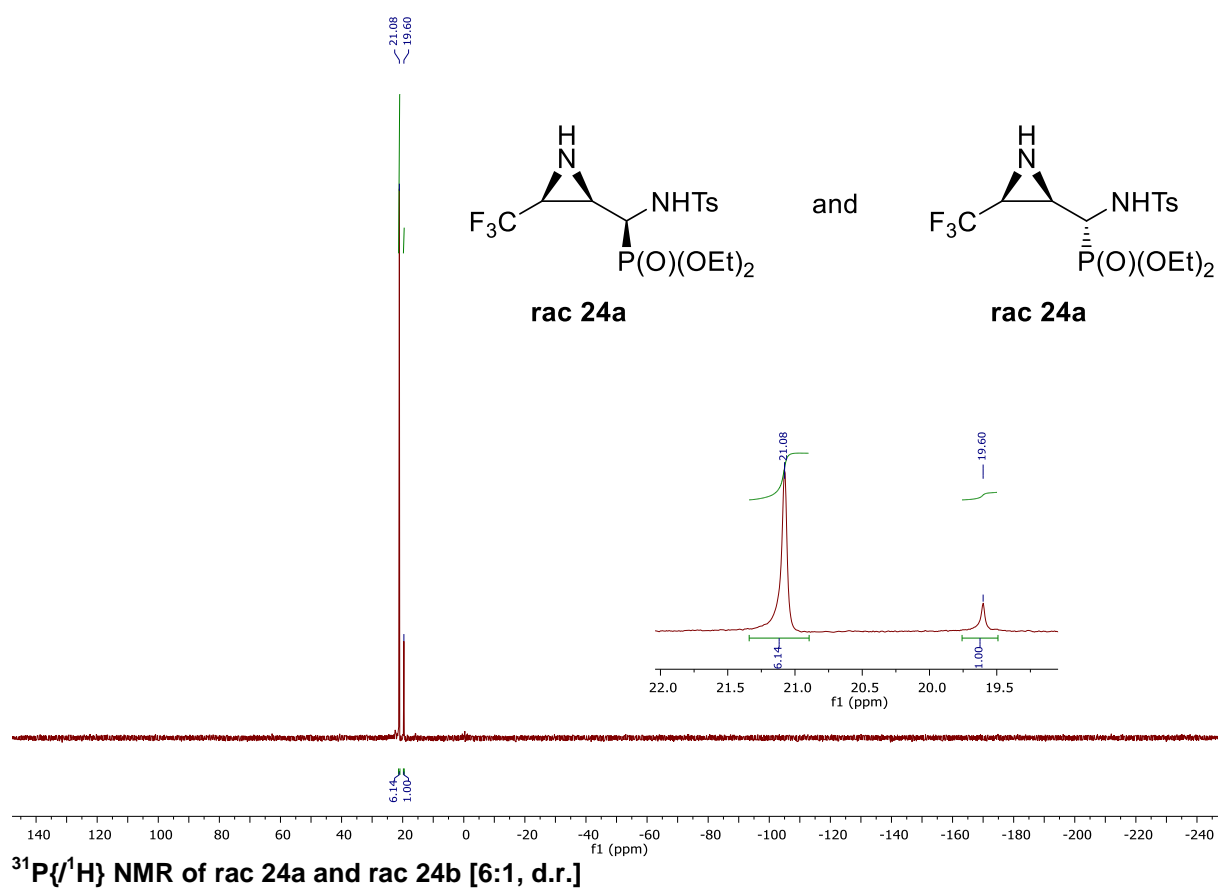

7.34  
7.33  
7.33  
7.31  
7.31  
7.30  
7.30  
7.29  
7.27  
7.26  
7.26  
7.25  
7.24  
7.23  
7.23  
7.22  
7.22  
7.21  
7.21  
7.08  
7.07  
7.05  
7.04  
7.04  
7.03  
7.02  
7.01  
5.29  
5.29  
5.29  
5.27  
5.27  
4.12  
4.10  
4.09  
4.09  
4.08  
4.07  
4.07  
4.05  
4.05  
4.02  
4.00  
3.99  
3.98  
3.98  
3.96  
3.96  
3.94  
3.93  
3.92  
3.91  
3.91  
3.90  
3.90  
3.88  
3.88  
3.85  
3.85  
3.81  
3.80  
3.79  
3.79  
3.77  
3.77  
3.75  
3.58  
3.55  
3.53  
3.52  
3.52  
3.24  
3.24  
3.23  
3.21  
3.21  
2.83  
2.81  
2.79  
2.79  
2.39  
1.20  
1.18  
1.16  
1.14  
1.14  
1.13

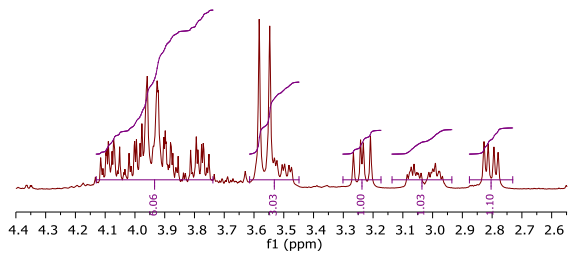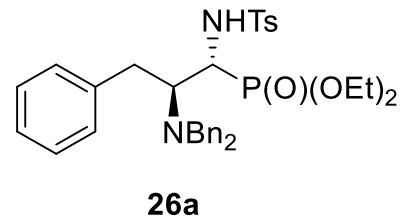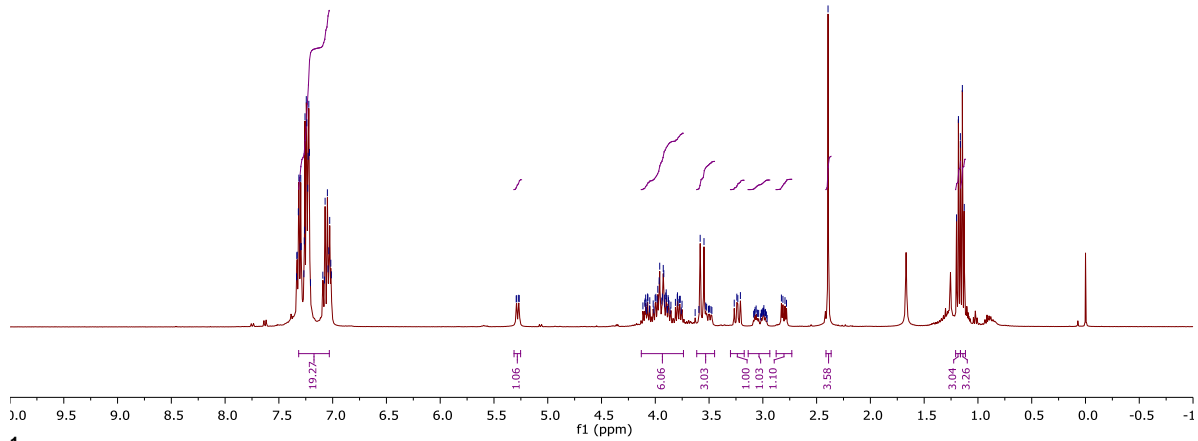

<sup>1</sup>H NMR of 26a

142.89  
139.09  
138.84  
136.84  
129.51  
129.51  
128.87  
128.87  
128.40  
128.31  
127.18  
127.11  
126.17

63.45  
63.42  
63.11  
63.04  
62.41  
62.35  
54.50  
49.43  
47.90

31.46

21.50  
16.23  
16.22  
16.21  
16.15  
16.15

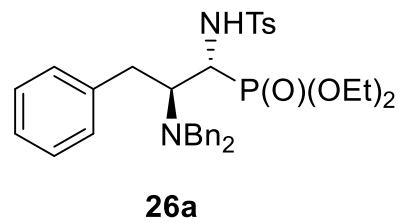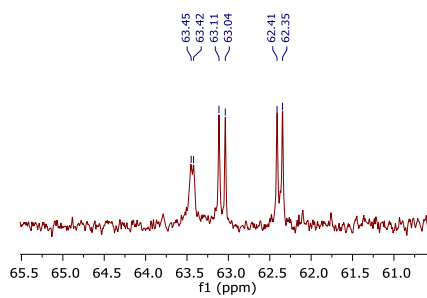

<sup>13</sup>C NMR of 26a

00  
190  
180  
170  
160  
150  
140  
130  
120  
110  
100  
90  
80  
70  
60  
50  
40  
30  
20  
10  
0

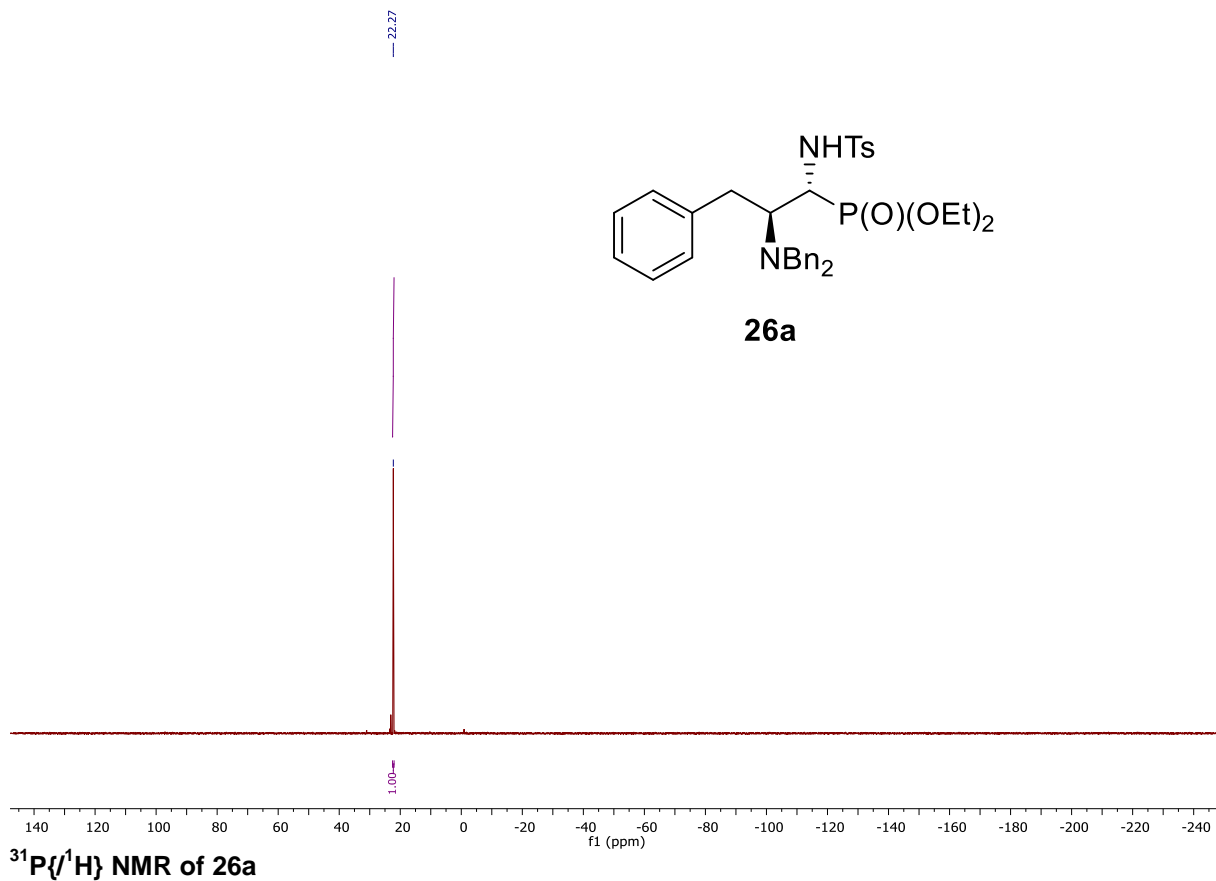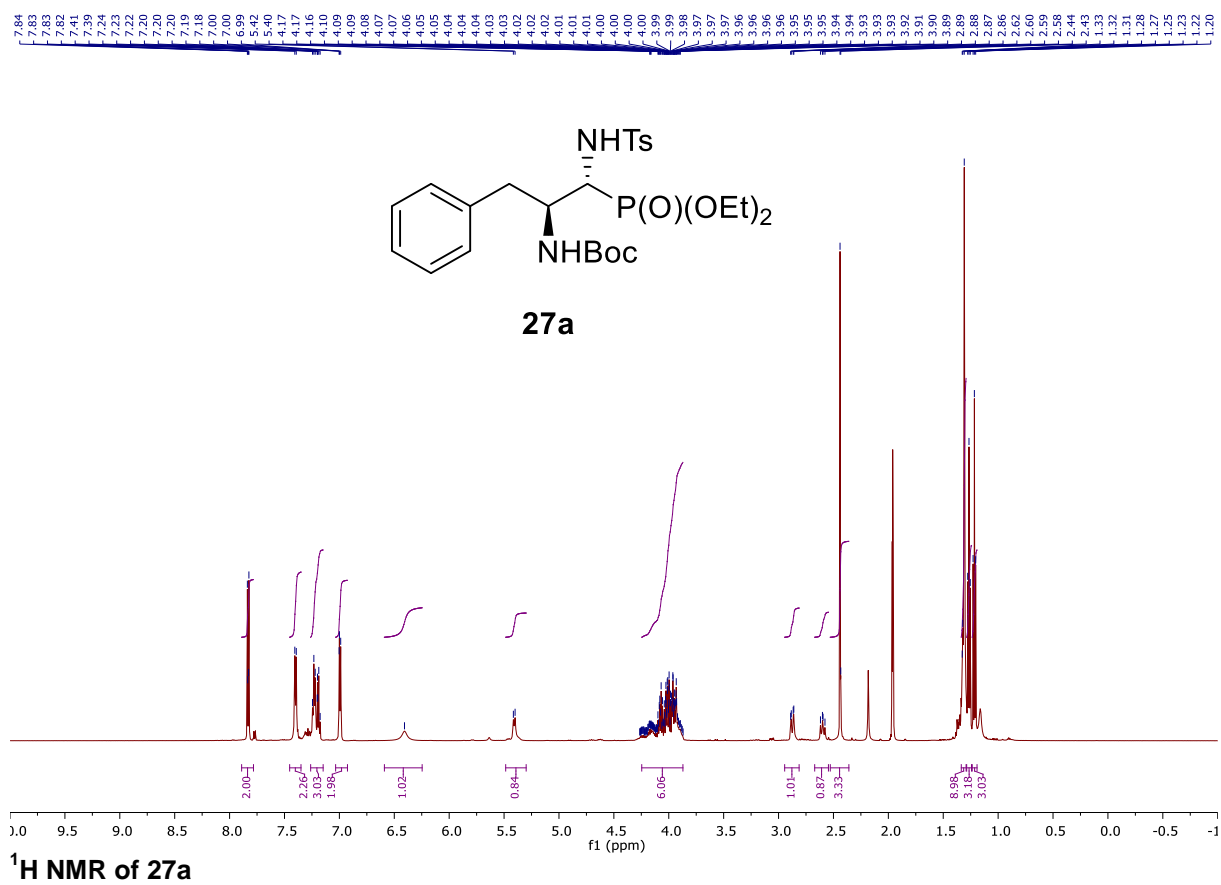

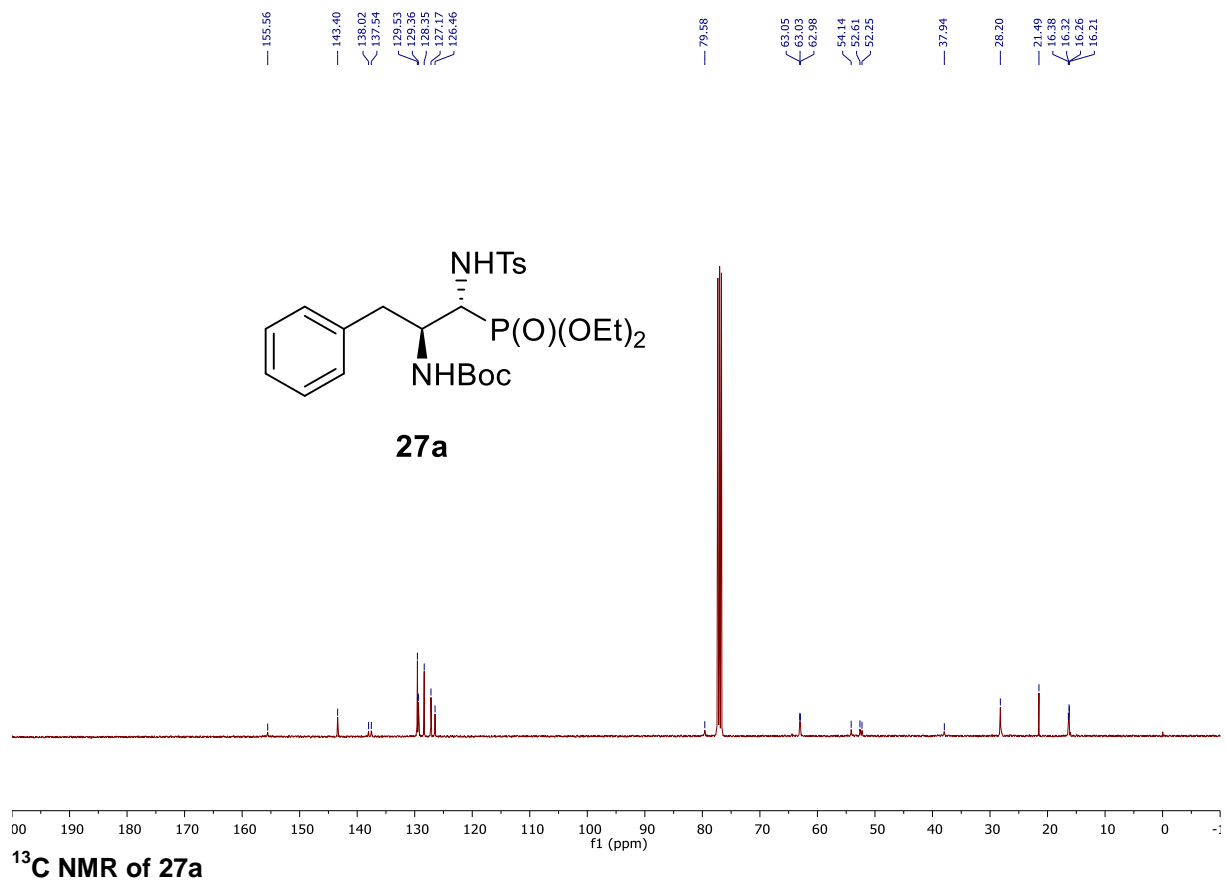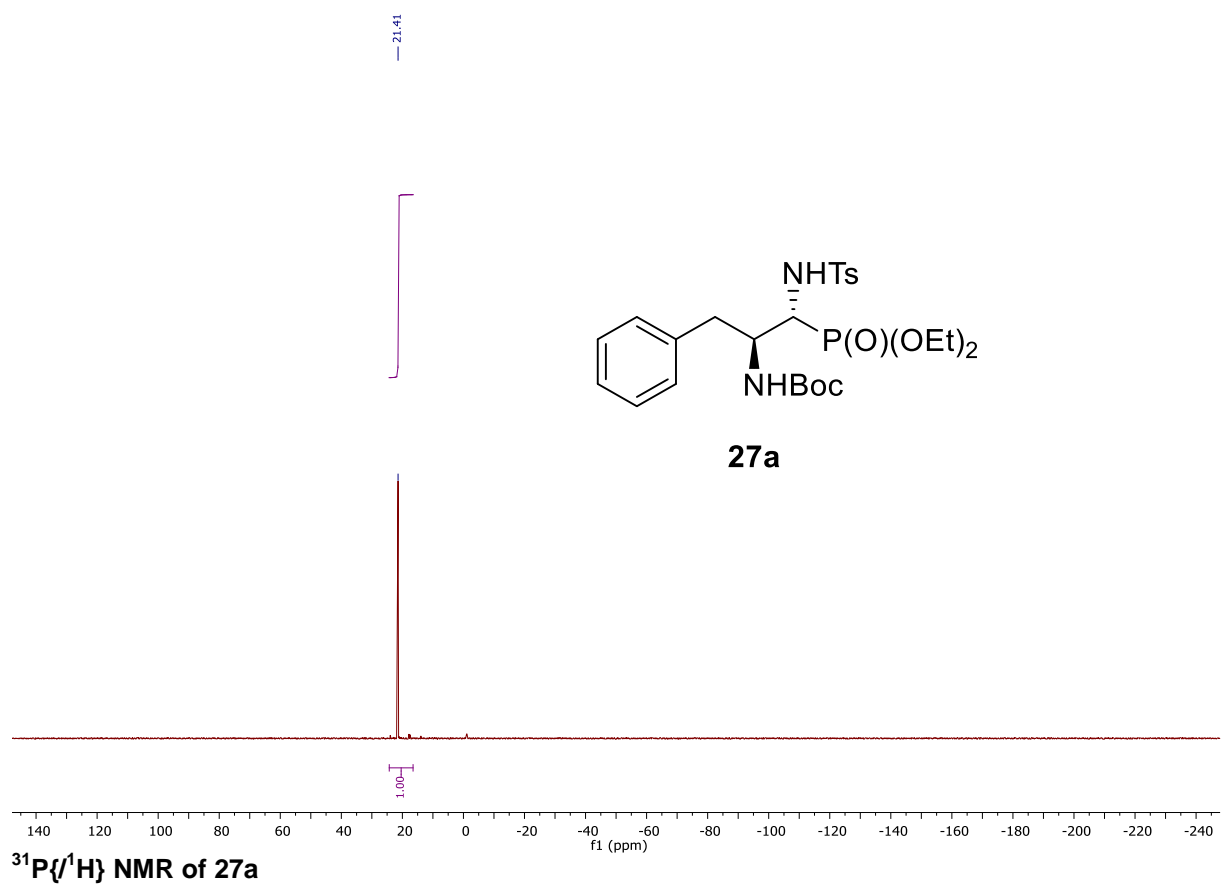

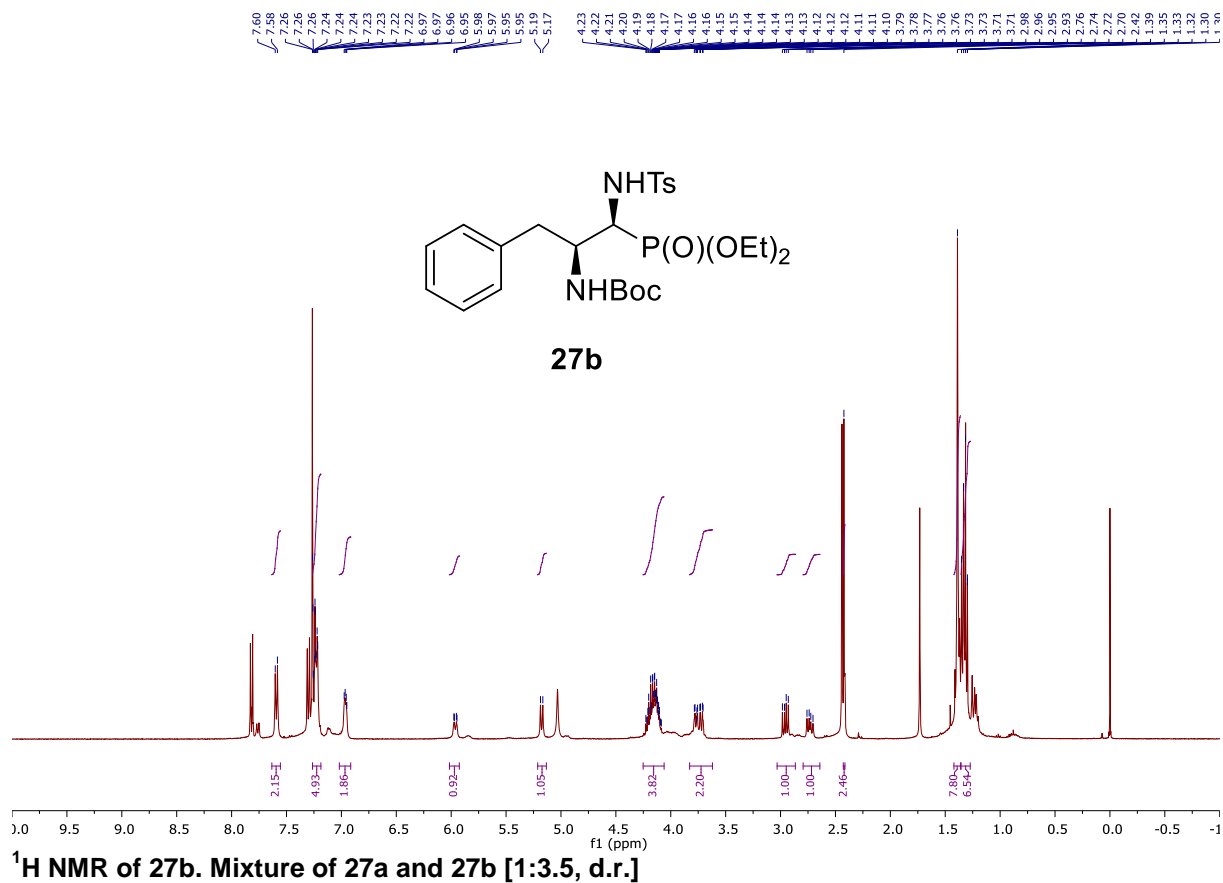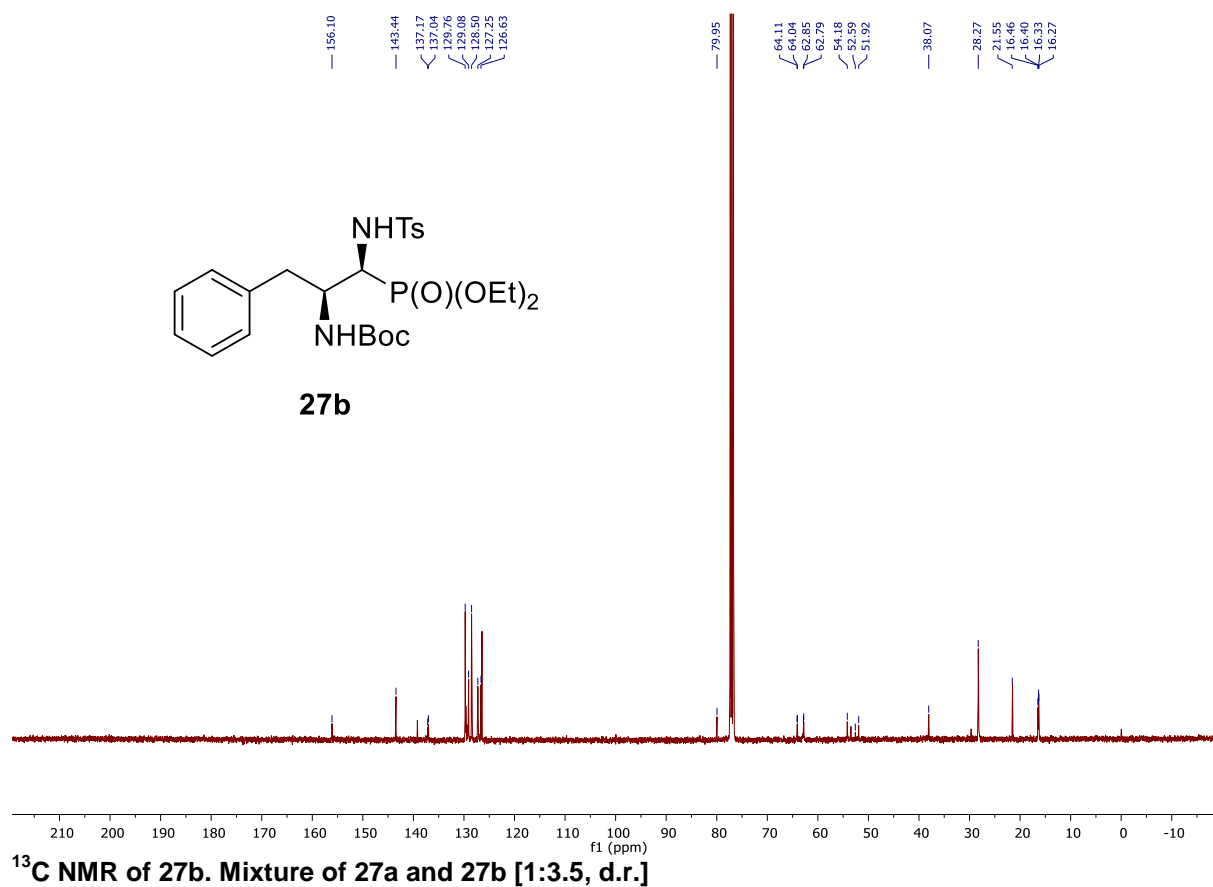



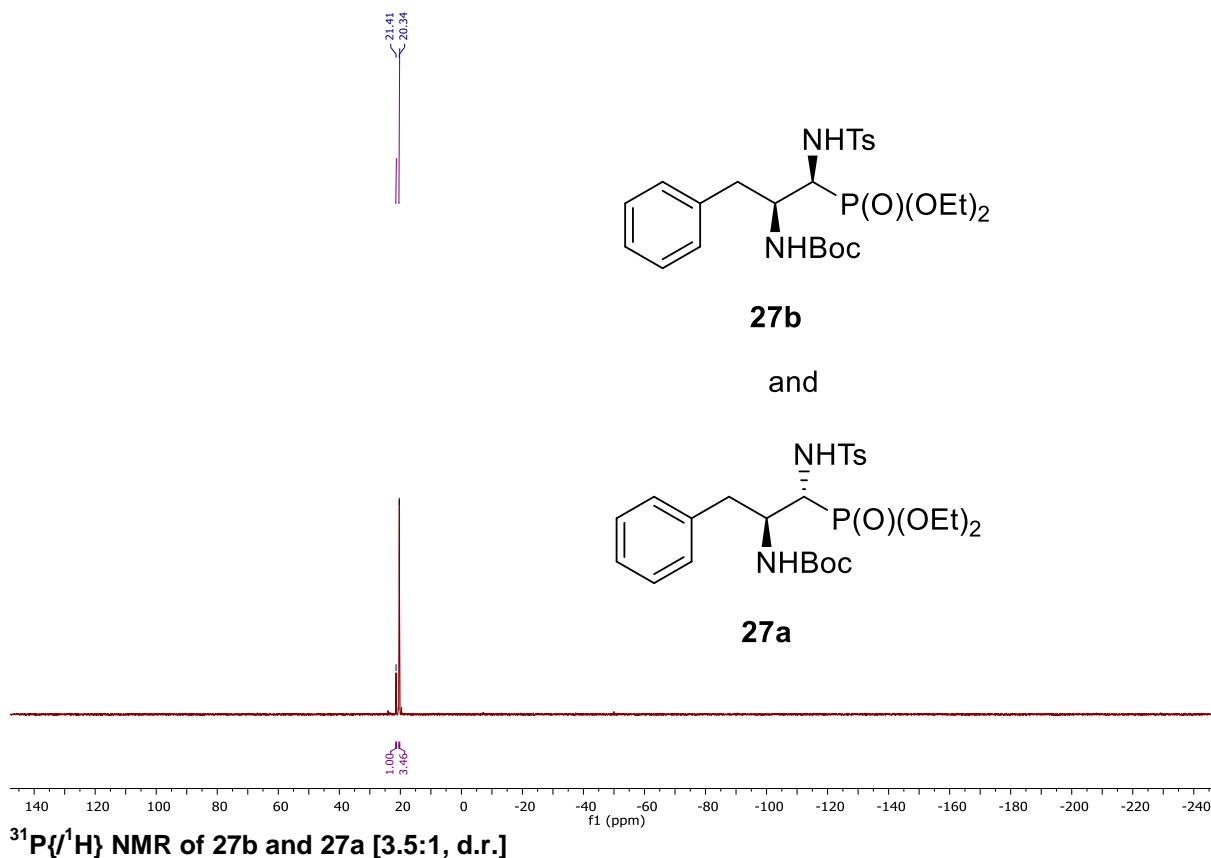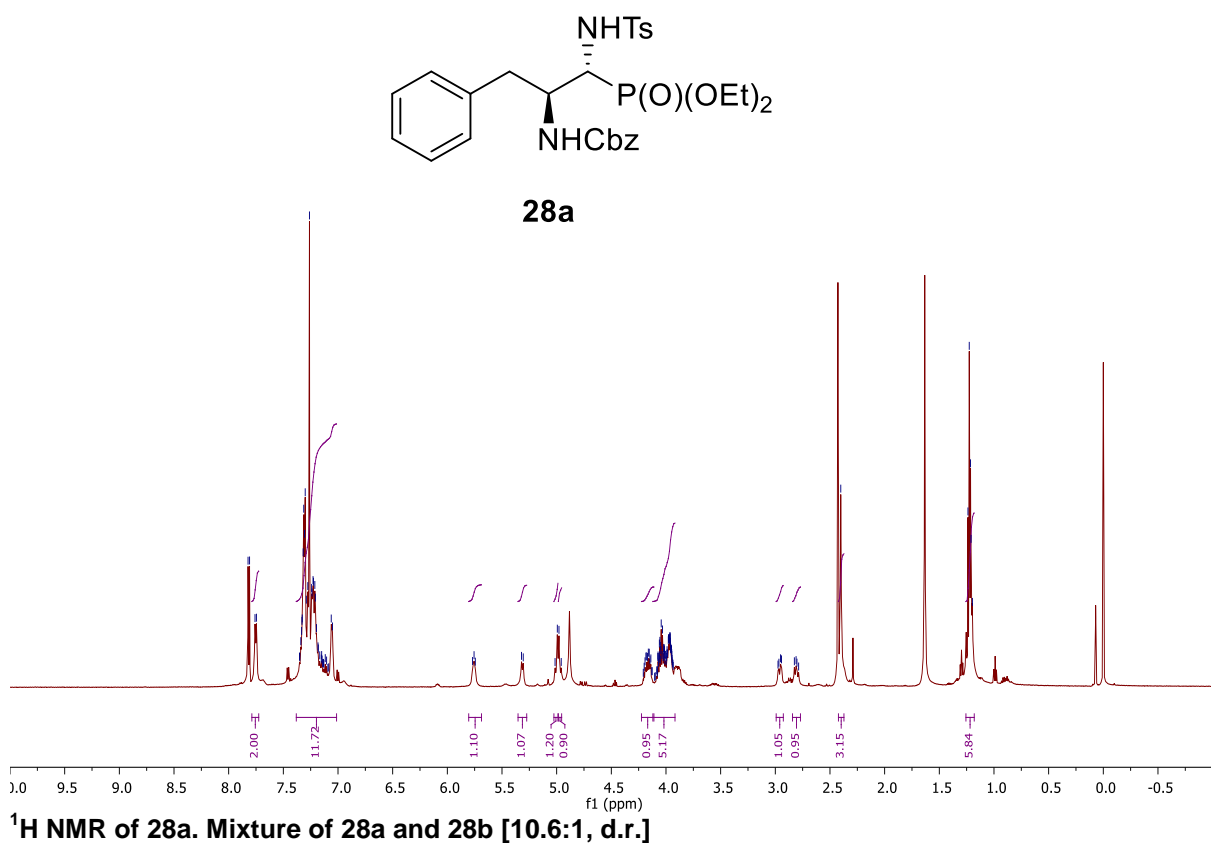

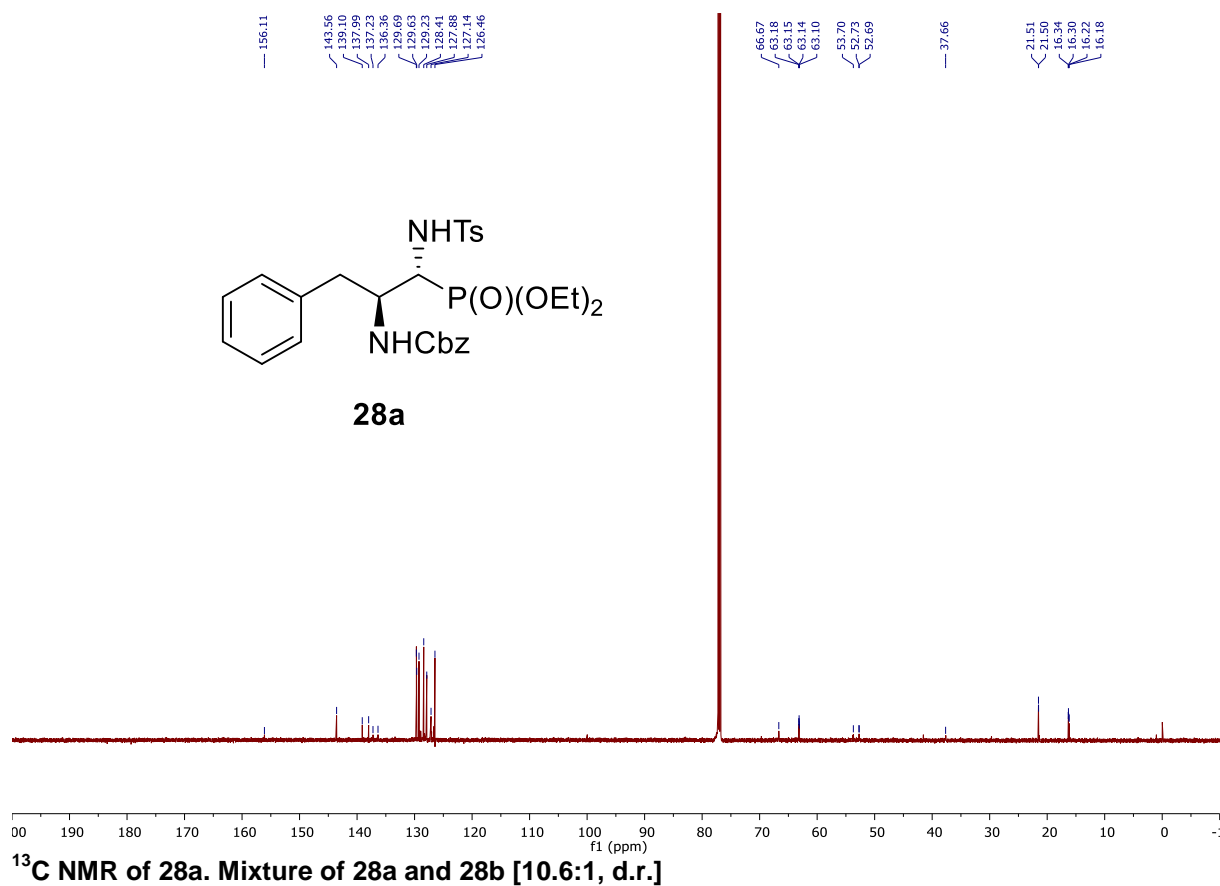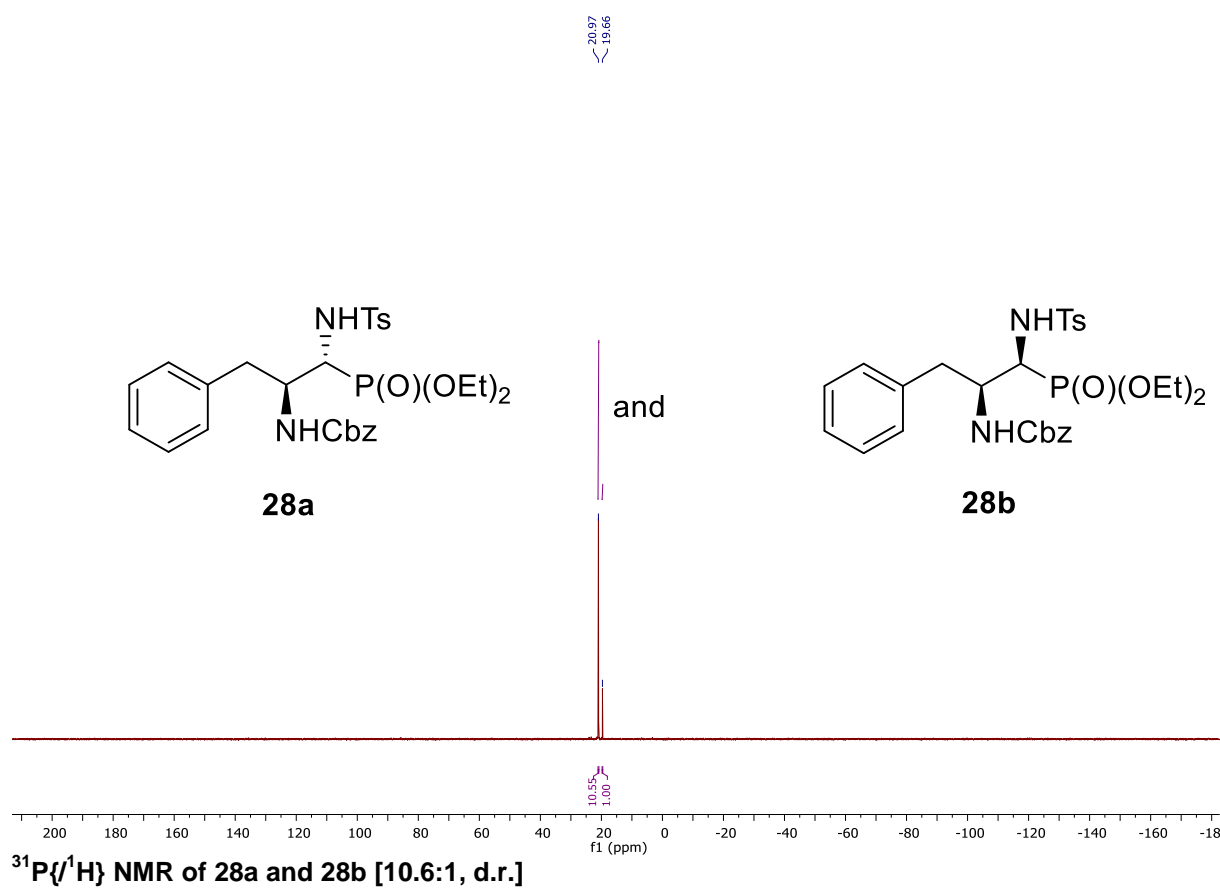



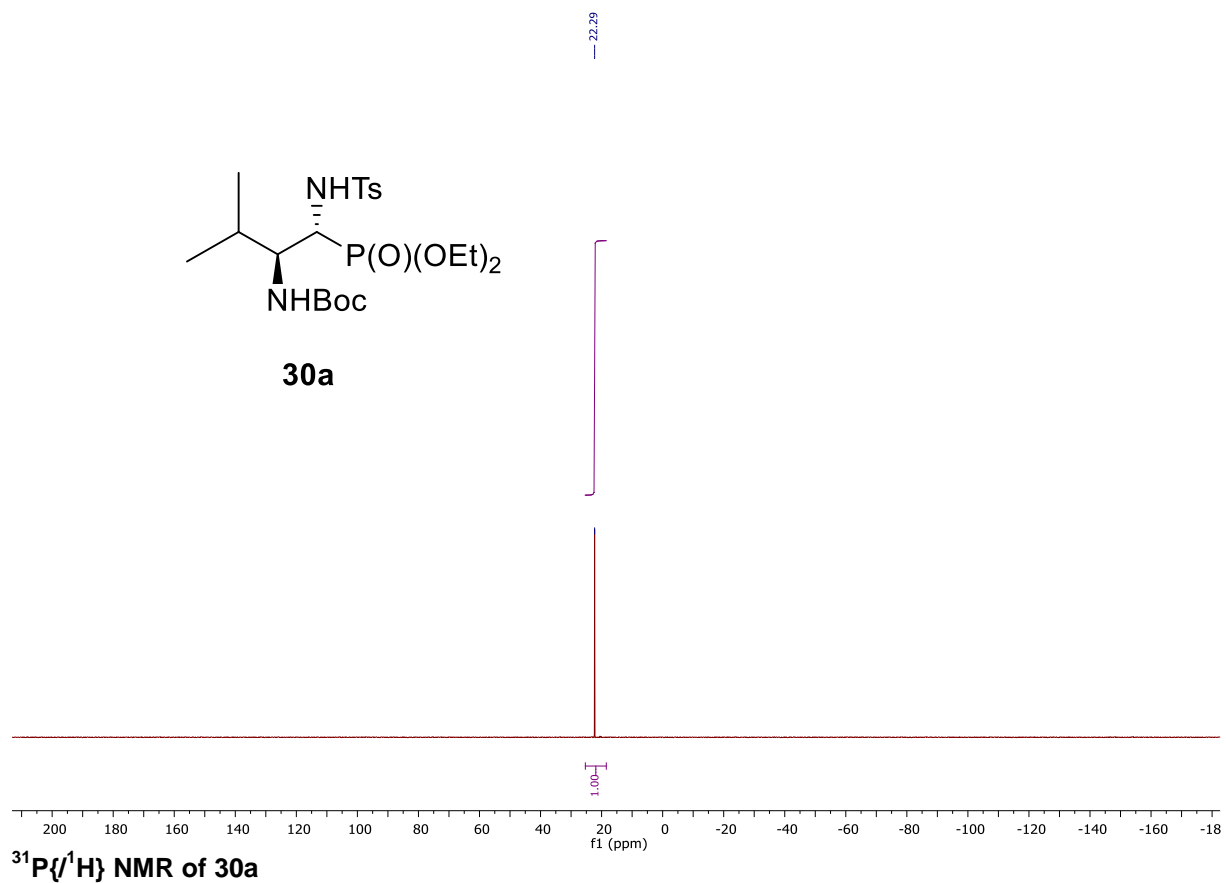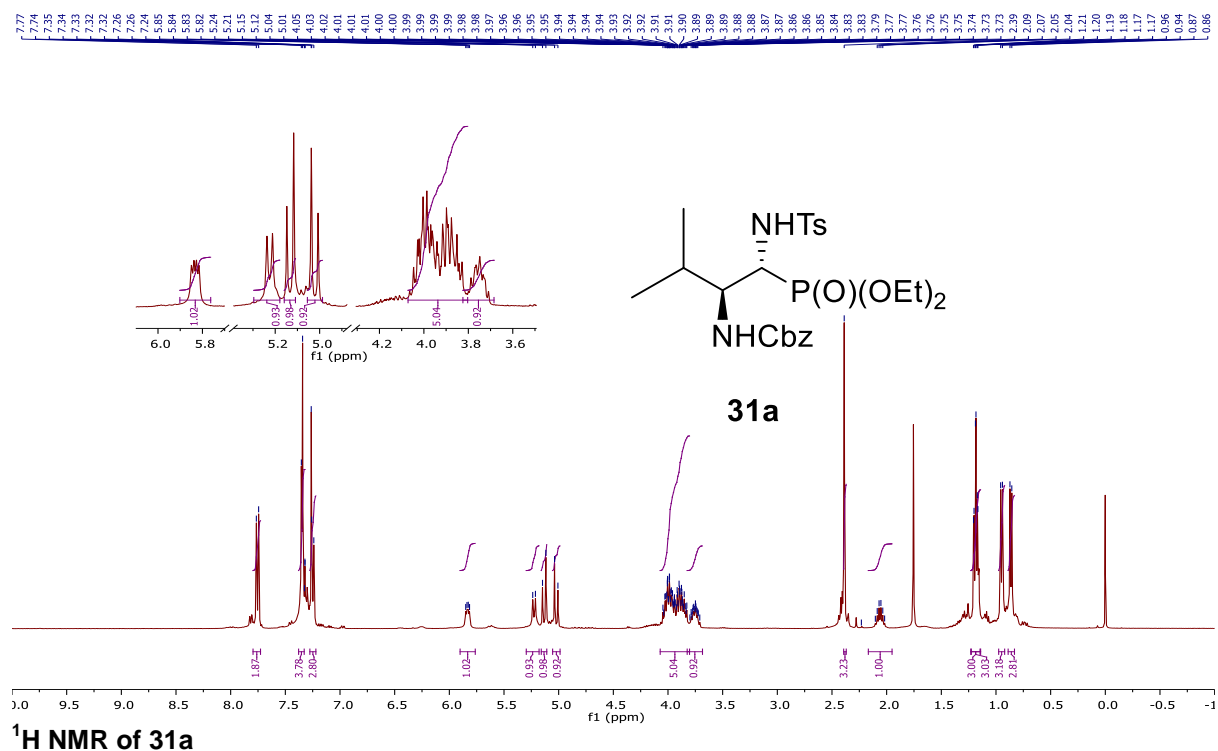

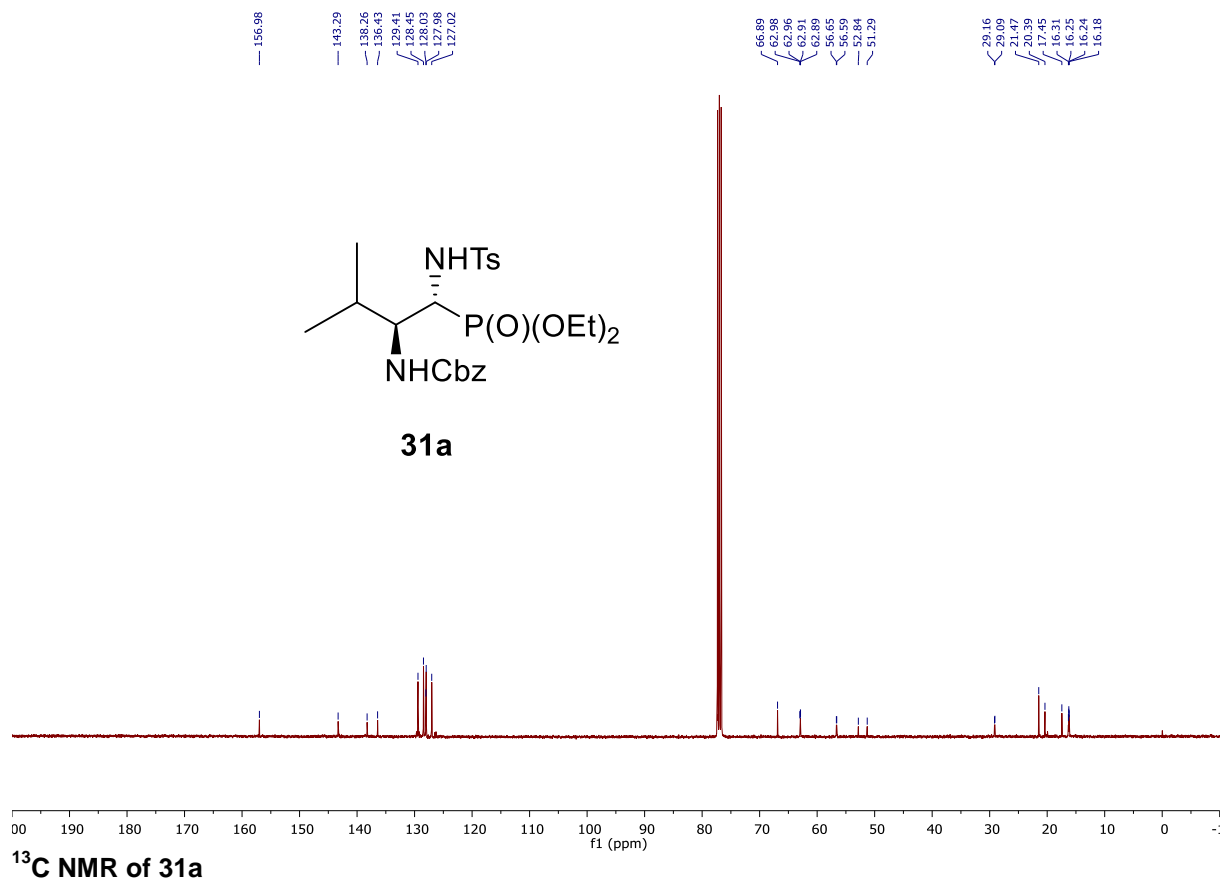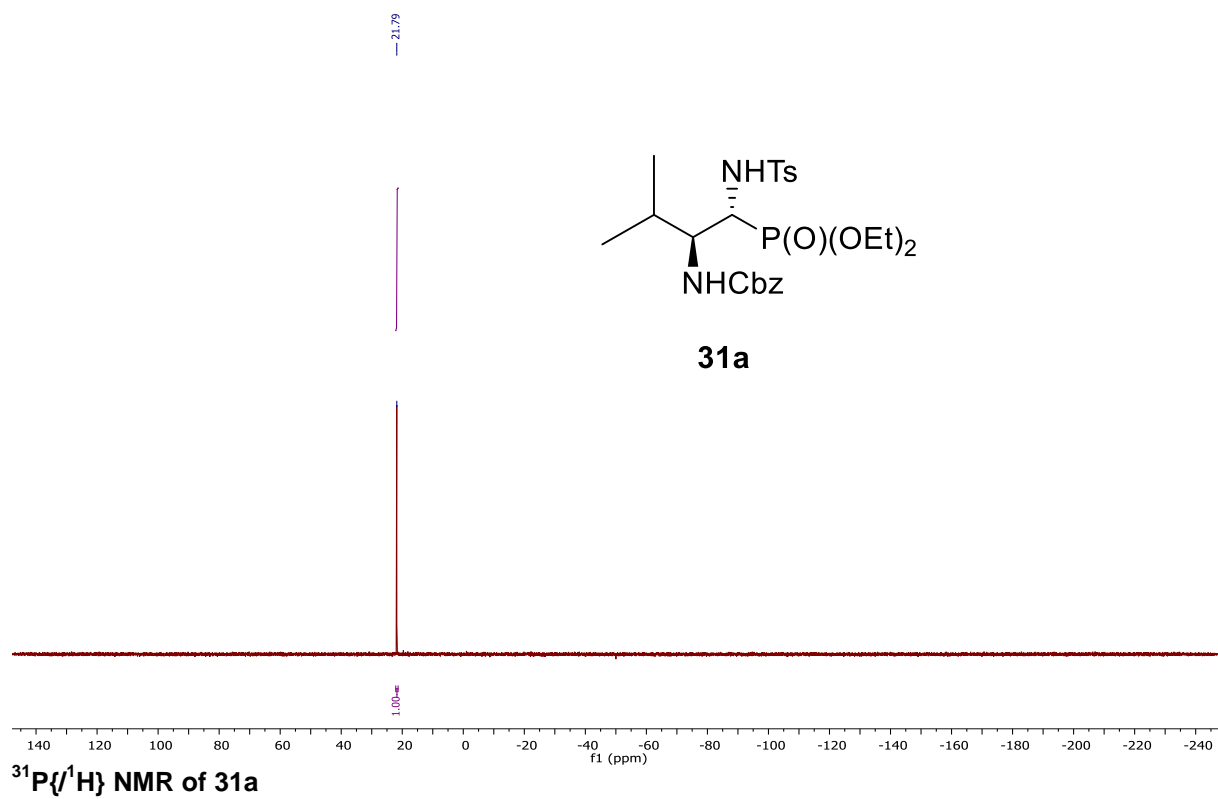

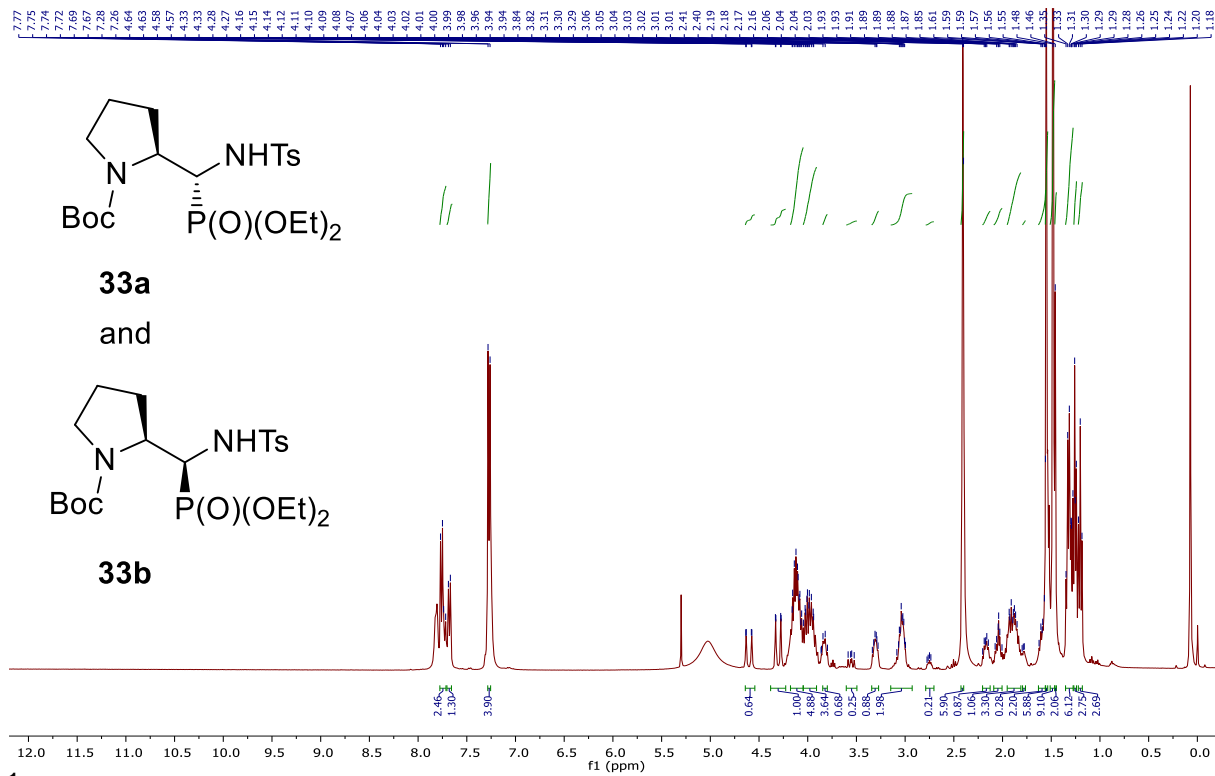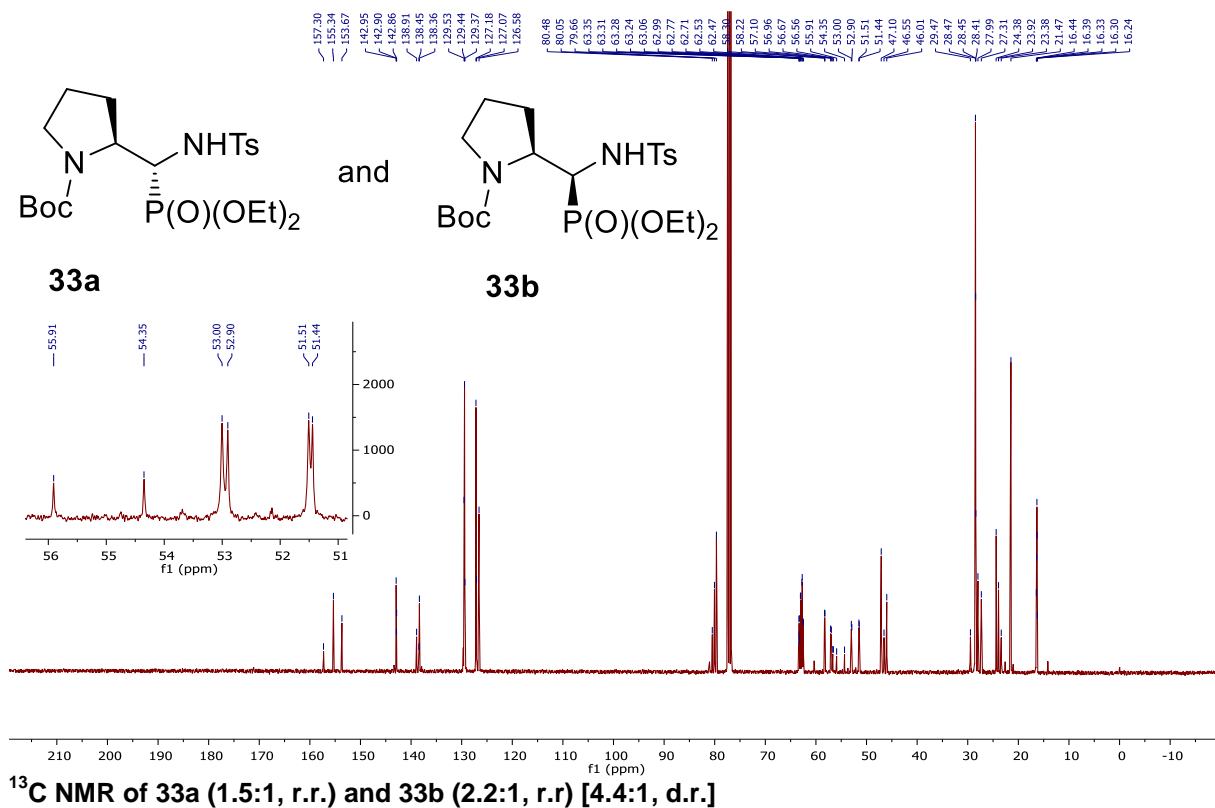

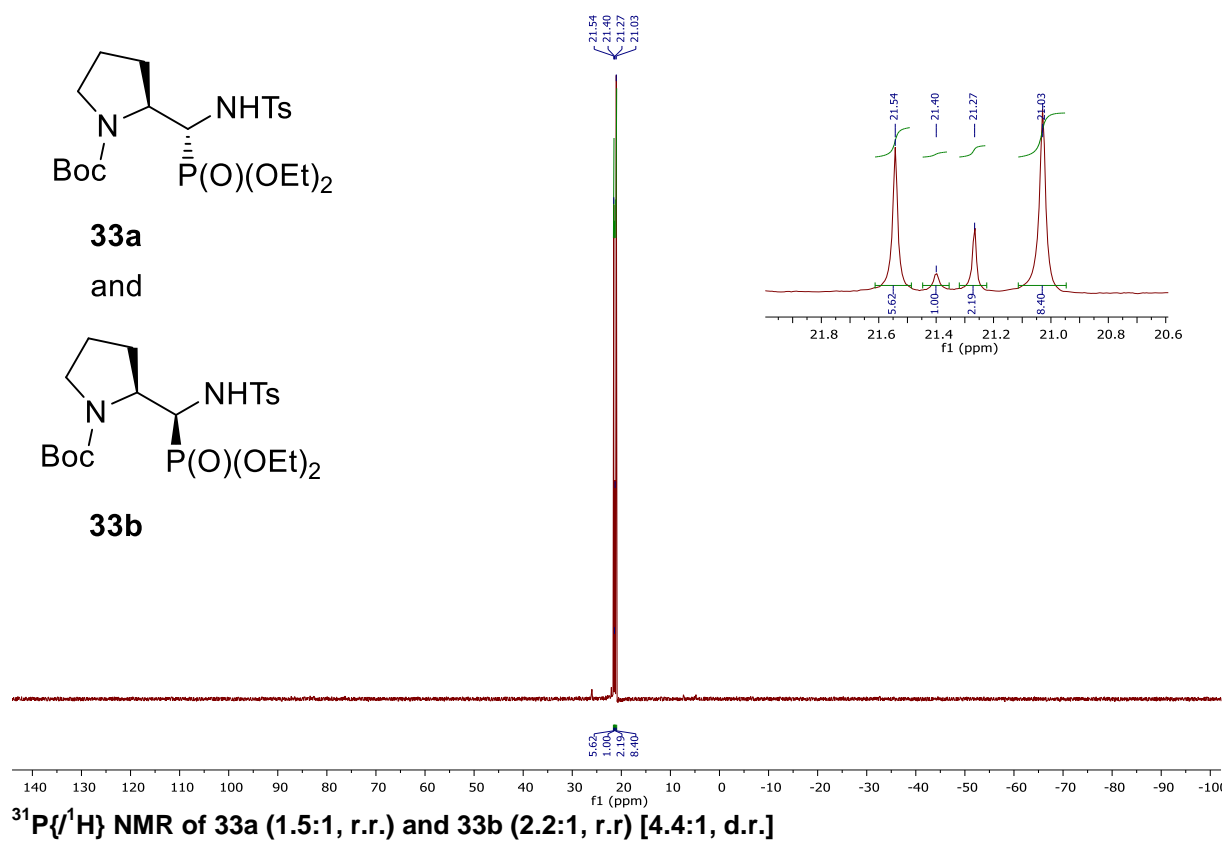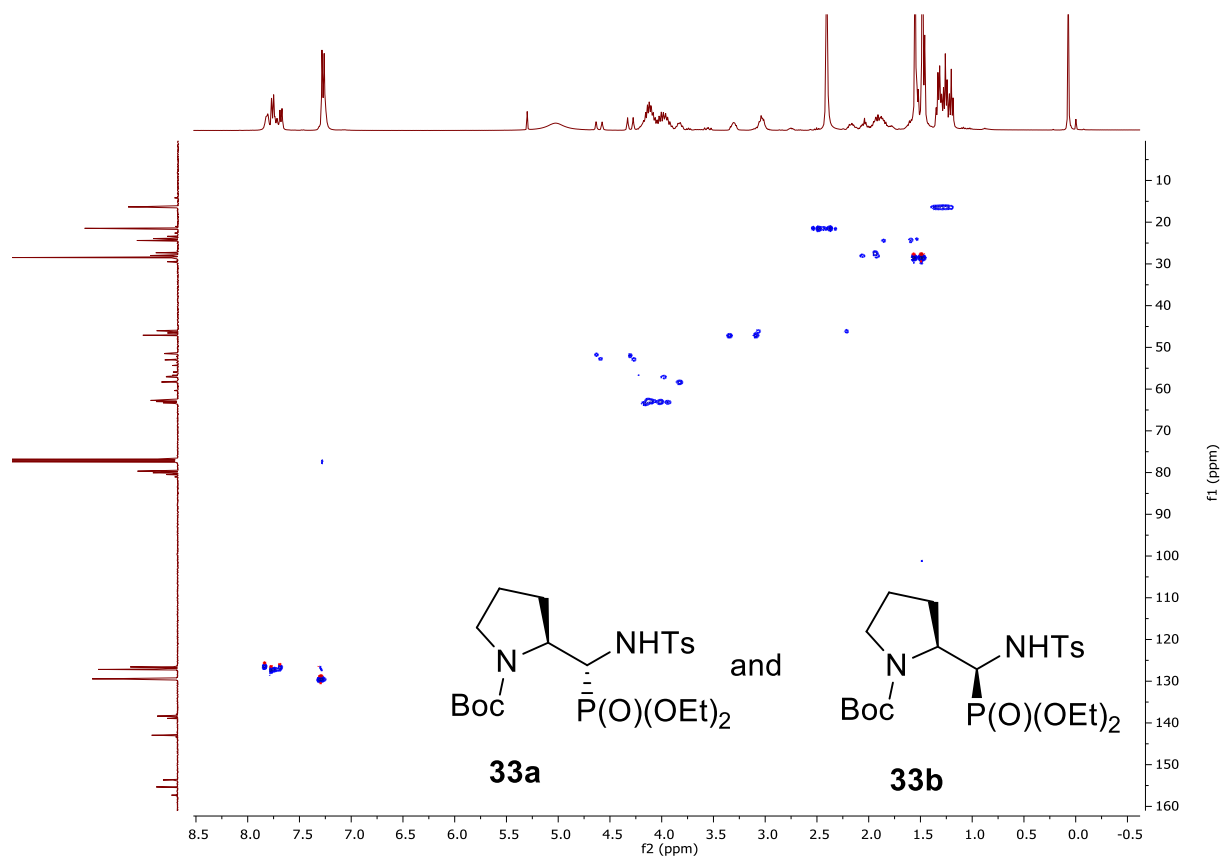

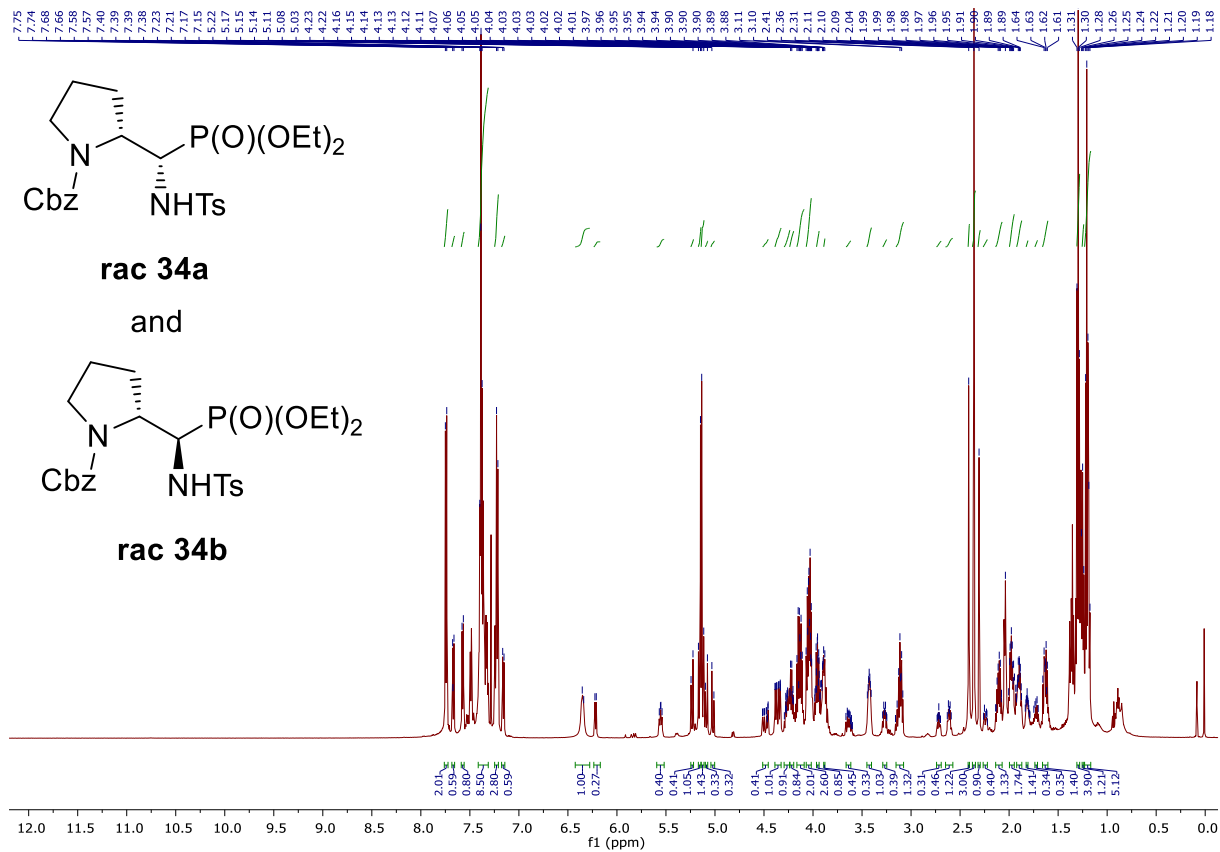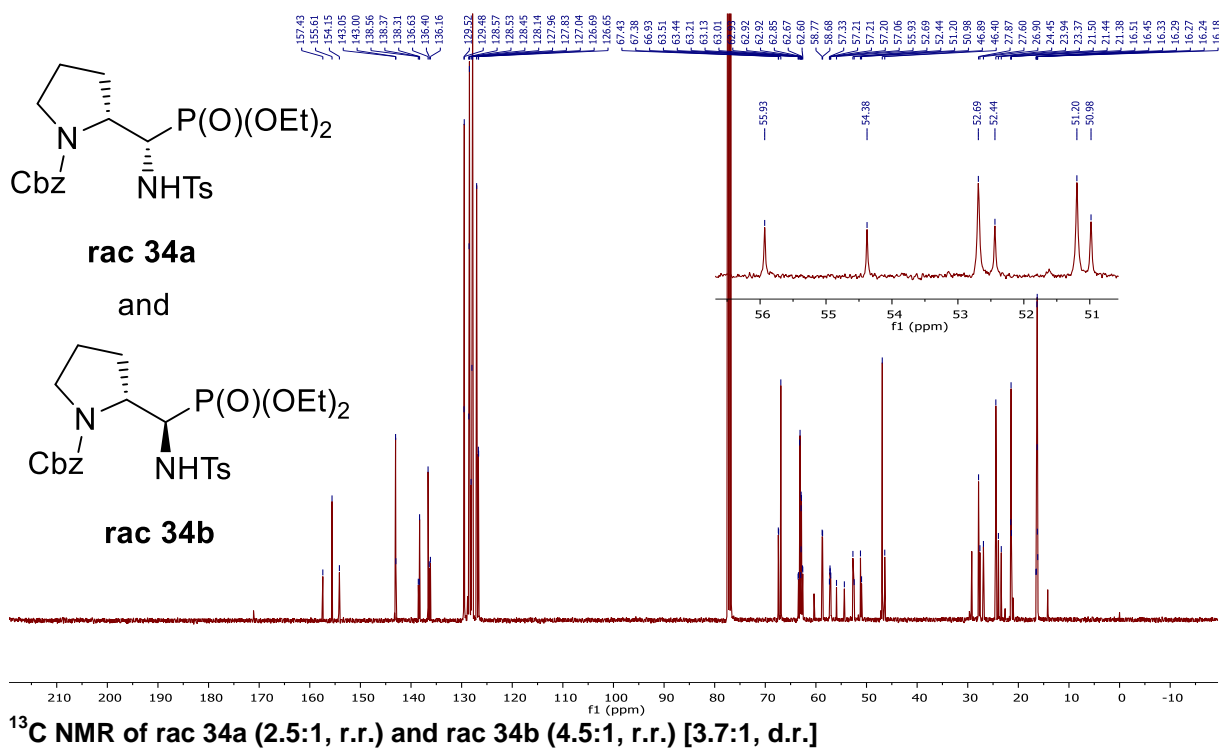



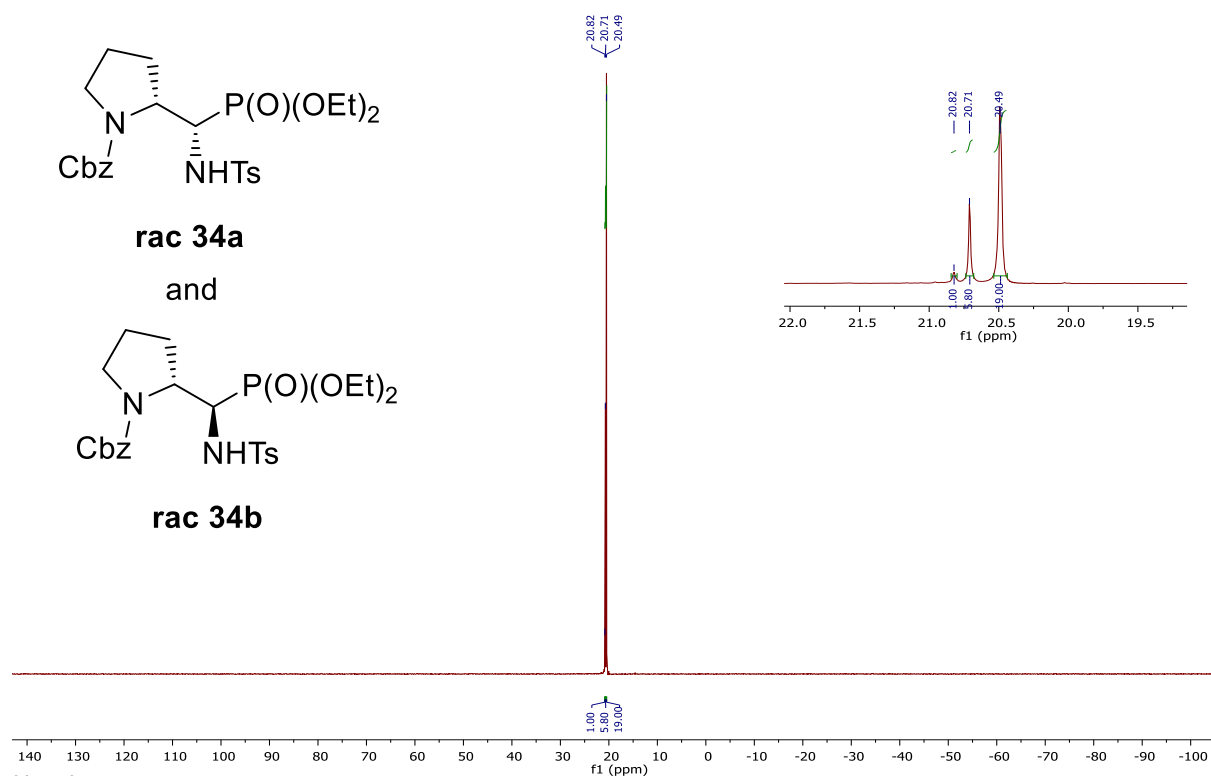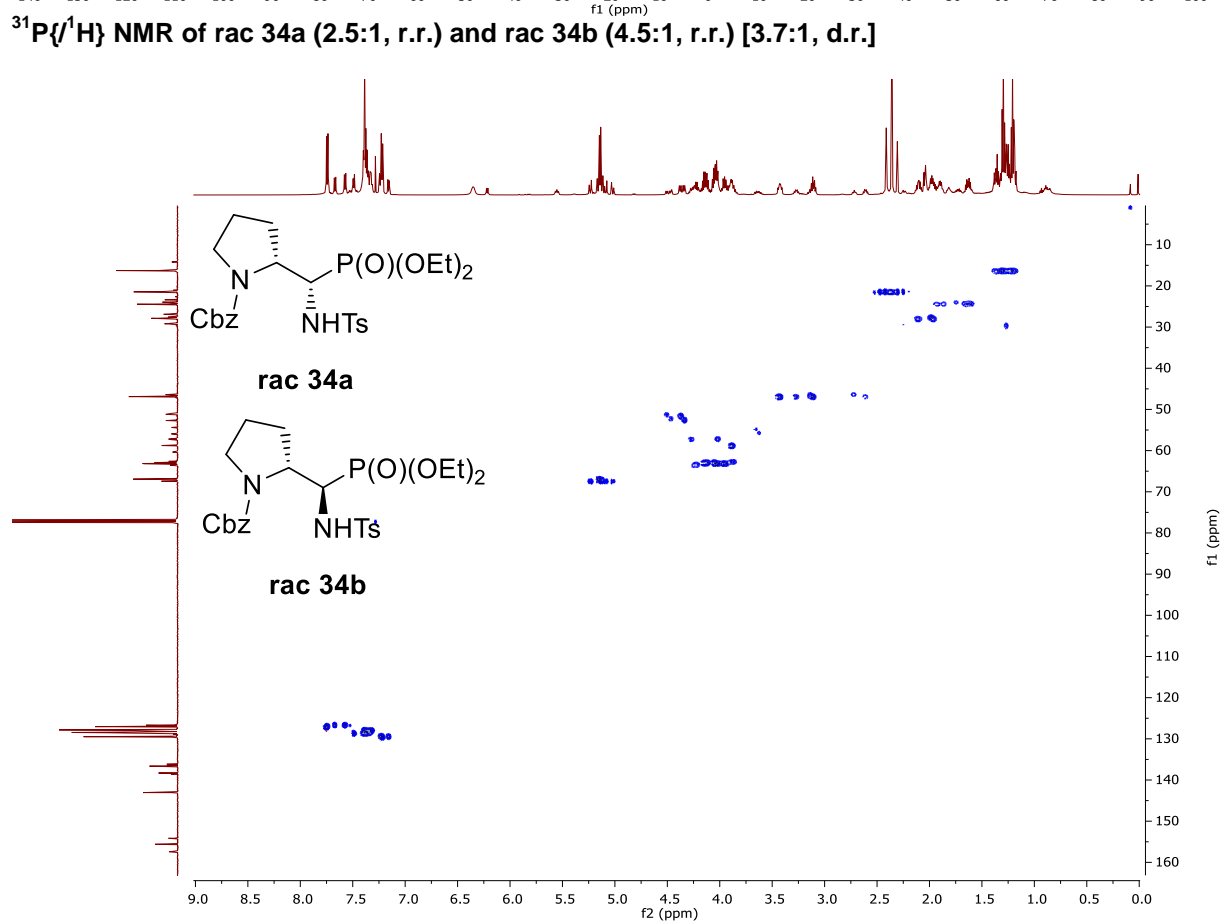

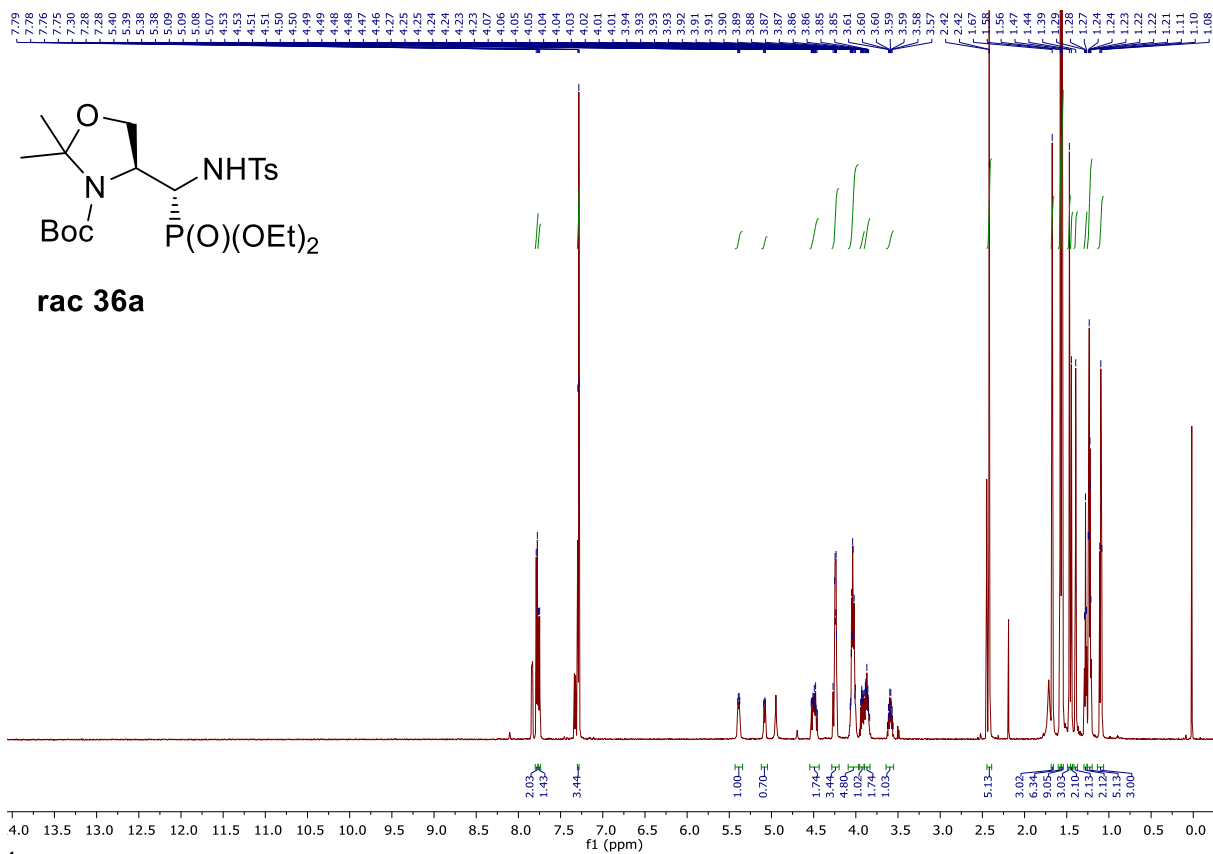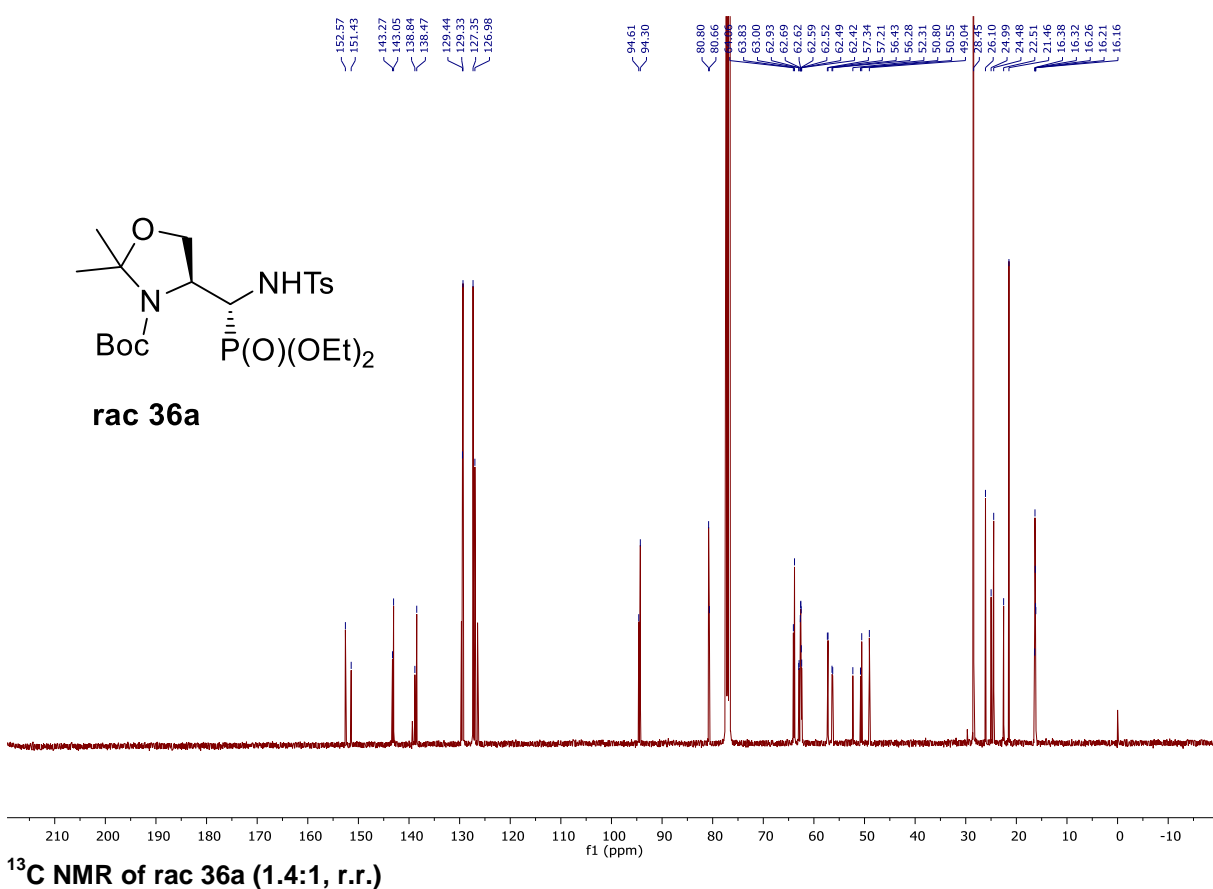

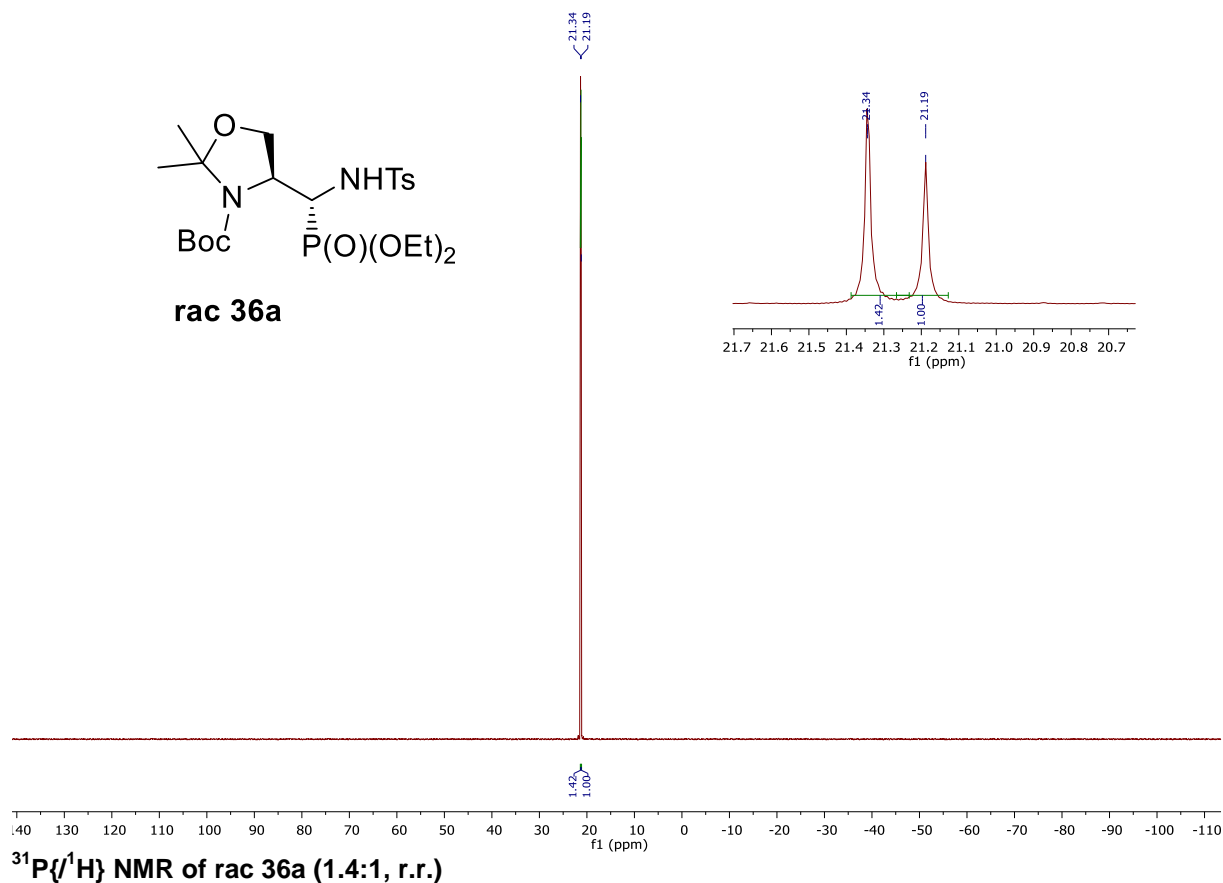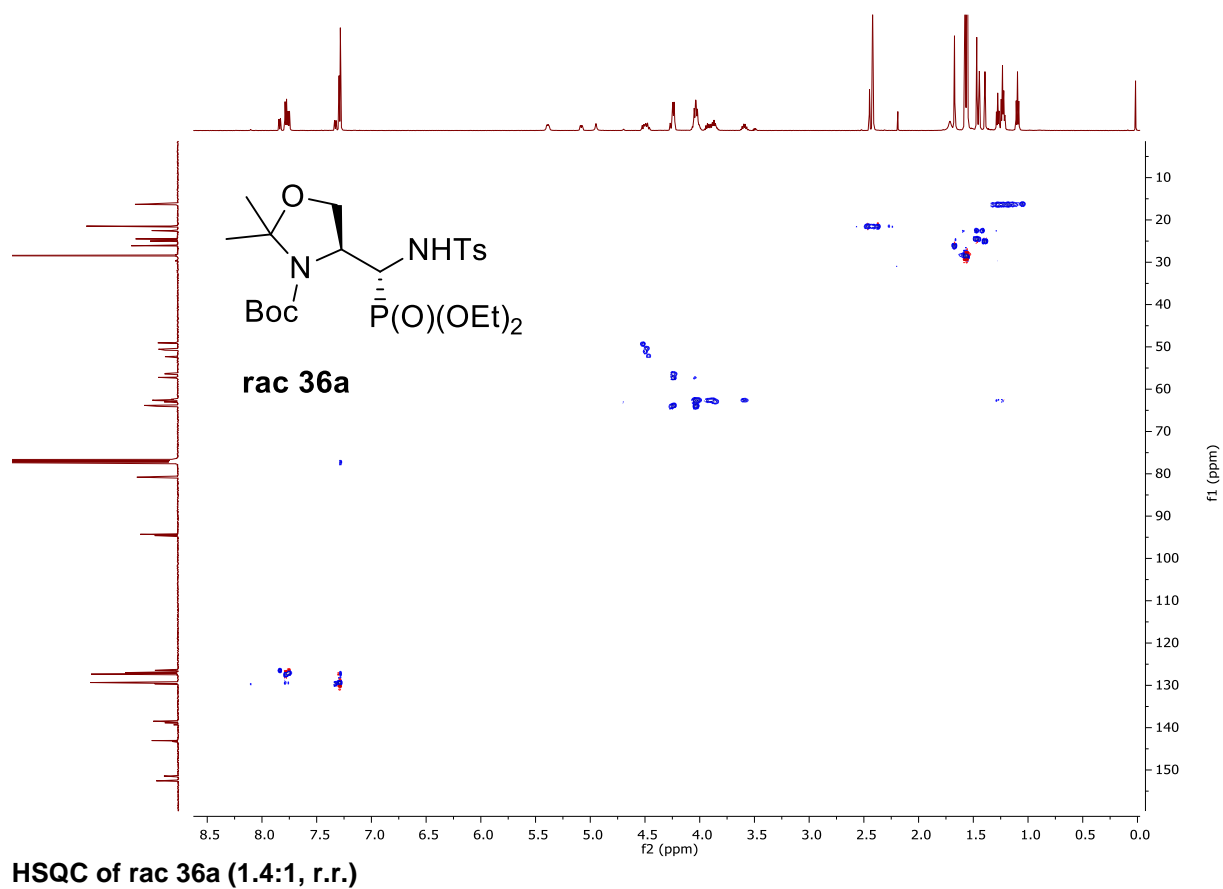



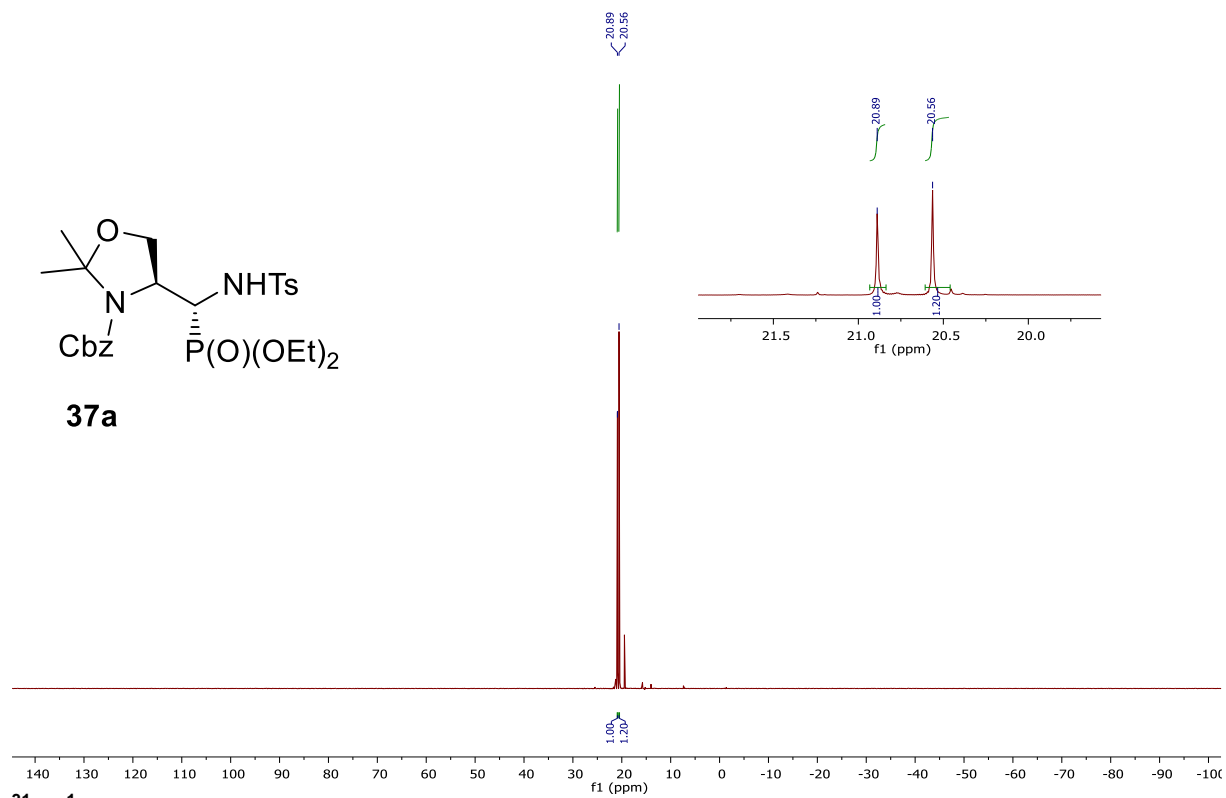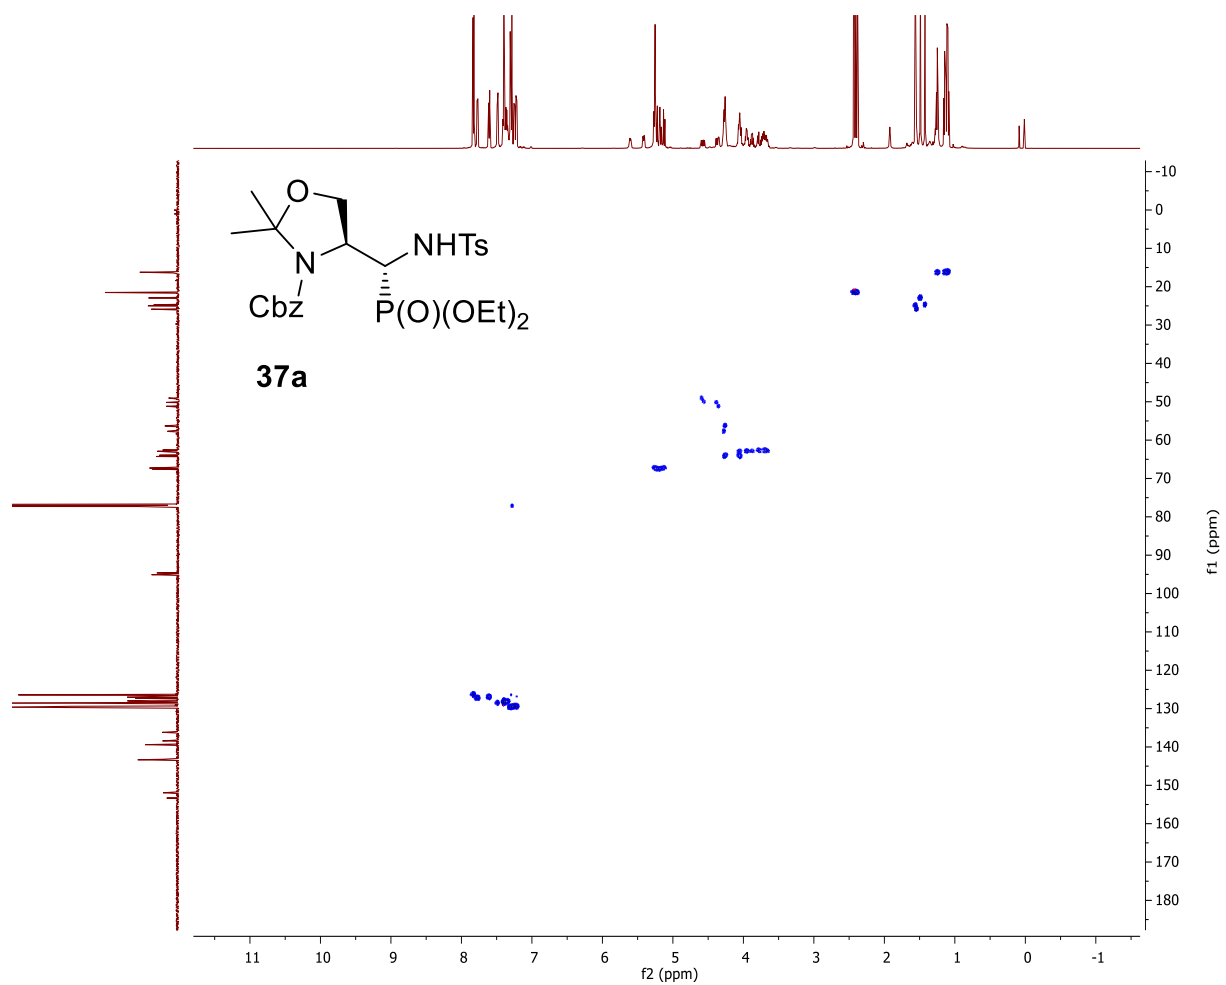

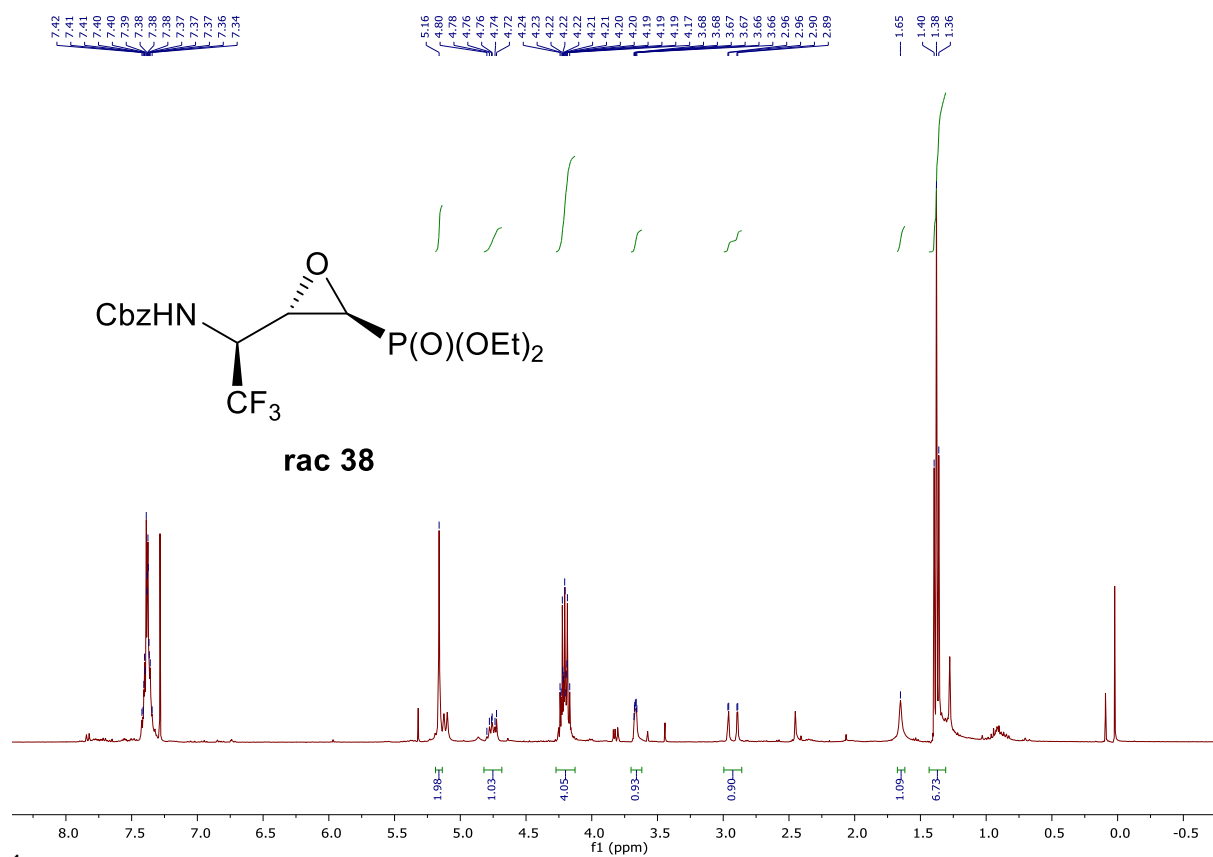

**<sup>1</sup>H NMR of rac 38**

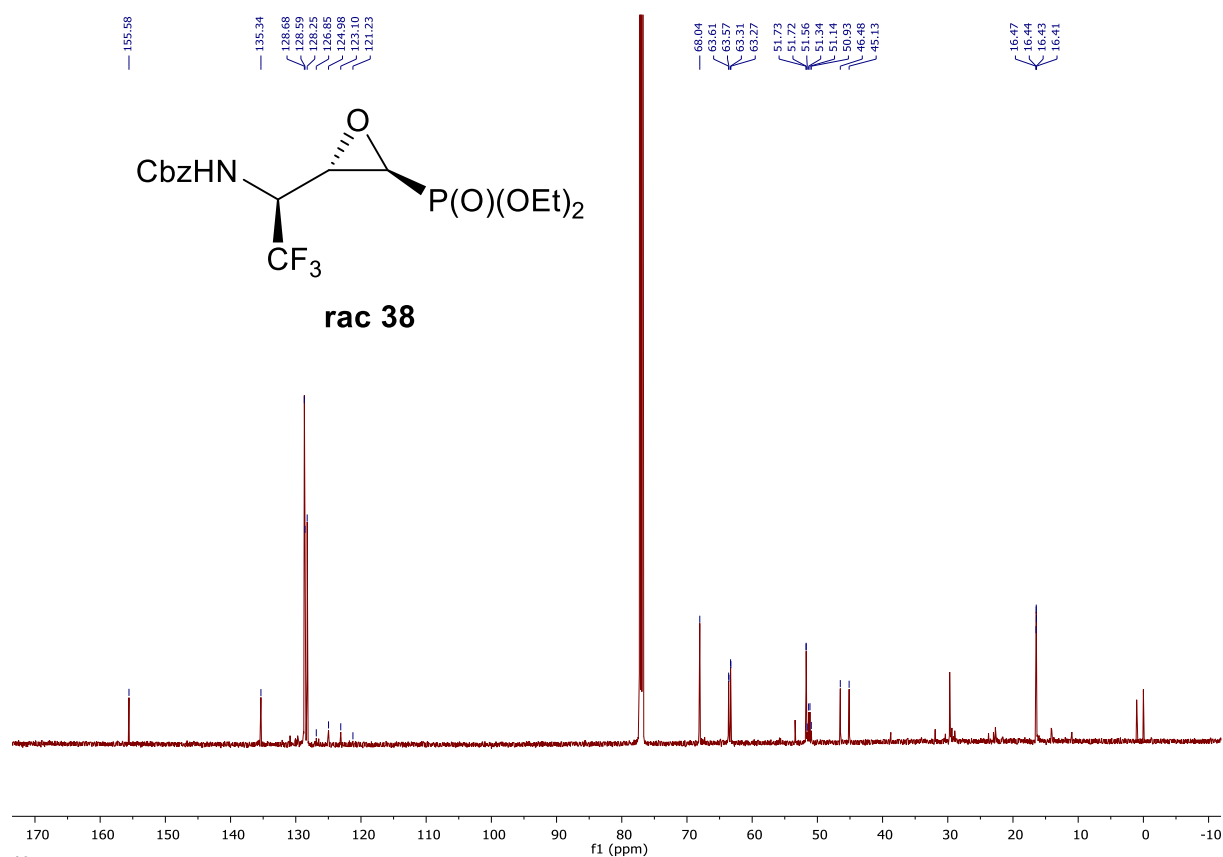

**<sup>13</sup>C NMR of rac 38**

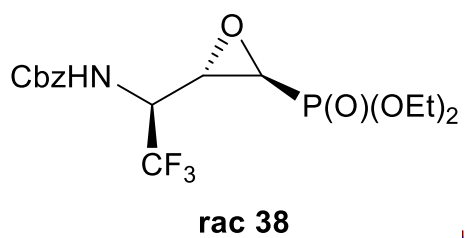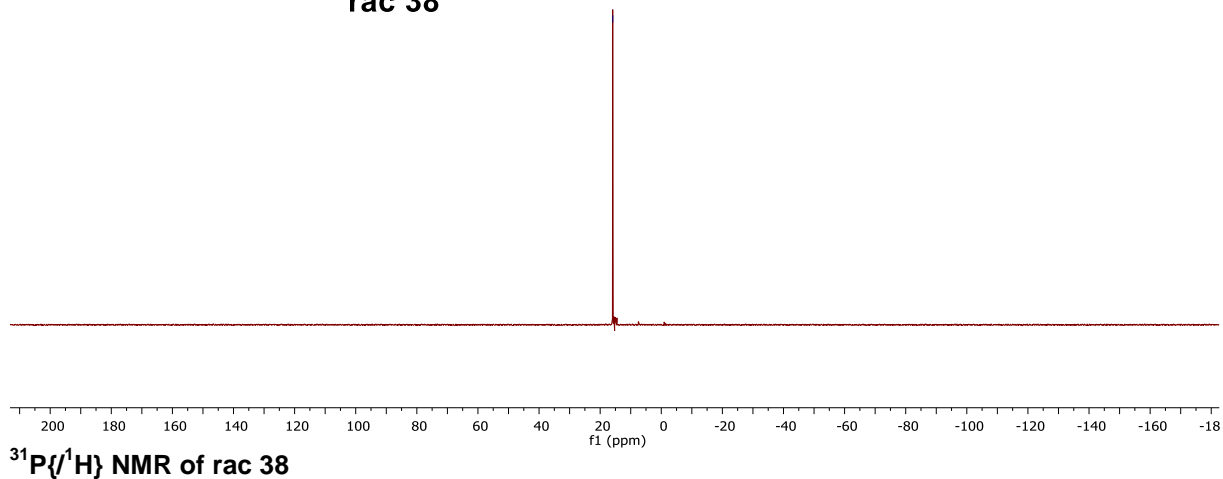

## 2. Crystallographic Data

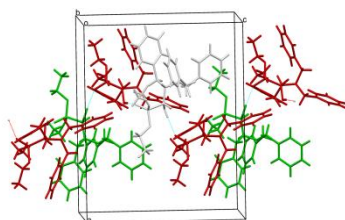

**Figure 1.** Chain of hydrogen-bonded 4-fold screw related molecules of **10a**, as seen approximately along y-direction. Hydrogen bonds are shown as thin blue lines.

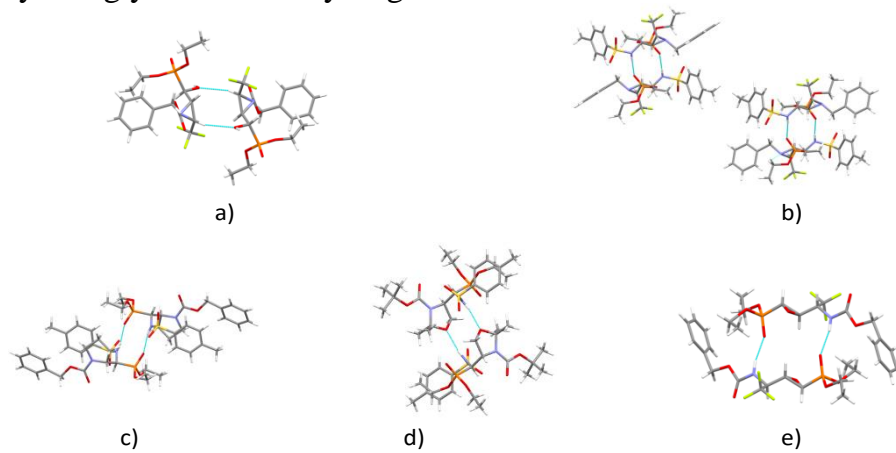

**Figure 2.** Centrosymmetric, hydrogen-bonded dimers observed in the crystal structures of a) **9a**, b) **23a**, c) **34a**, d) **36a**, e) **38**. Hydrogen bonds are shown as dashed blue lines; for **23a** the dimers created by both symmetry-independent molecules are shown.

**Table 1.** Crystal data and refinement details

| Compound                             | <b>9a</b>                                      | <b>10a</b>                         | <b>23a</b>                                       | <b>34a</b>                                     | <b>36a</b>                                                    | <b>38</b>                                        |
|--------------------------------------|------------------------------------------------|------------------------------------|--------------------------------------------------|------------------------------------------------|---------------------------------------------------------------|--------------------------------------------------|
| Formula                              | C <sub>16</sub> H <sub>21</sub> F <sub>3</sub> | C <sub>27</sub> H <sub>34</sub> NO | C <sub>22</sub> H <sub>28</sub> F <sub>3</sub> N | C <sub>24</sub> H <sub>33</sub> N <sub>2</sub> | C <sub>22</sub> H <sub>37</sub> N <sub>2</sub> O <sub>8</sub> | C <sub>16</sub> H <sub>21</sub> F <sub>3</sub> N |
| Formula                              | 411.31                                         | 467.52                             | 520.49                                           | 524.55                                         | 520.56                                                        | 411.31                                           |
| Crystal                              | triclinic                                      | Tetragonal                         | triclinic                                        | triclinic                                      | triclinic                                                     | triclinic                                        |
| Space                                | P-1                                            | P4 <sub>1</sub> 2 <sub>1</sub> 2   | P-1                                              | P-1                                            | P-1                                                           | P-1                                              |
| a(Å)                                 | 9.2602(5)                                      | 18.3893(4)                         | 9.4187(3)                                        | 9.1196(7)                                      | 11.2960(6)                                                    | 10.1589(16)                                      |
| b(Å)                                 | 9.4720(4)                                      | 18.3893(4)                         | 11.5503(5)                                       | 11.0522(9)                                     | 12.0965(6)                                                    | 10.3309(11)                                      |
| c(Å)                                 | 11.9414(4)                                     | 15.9702(8)                         | 25.4175(1)                                       | 13.6480(1)                                     | 12.4628(6)                                                    | 10.8732(11)                                      |
| α(°)                                 | 107.154(4)                                     | 90                                 | 90.406(3)                                        | 71.568(8)                                      | 112.998(5)                                                    | 108.225(10)                                      |
| β(°)                                 | 96.395(3)                                      | 90                                 | 99.189(3)                                        | 77.690(7)                                      | 110.653(4)                                                    | 112.480(12)                                      |
| γ(°)                                 | 95.550(4)                                      | 90                                 | 113.524(4)                                       | 87.393(6)                                      | 98.152(4)                                                     | 90.483(10)                                       |
| V(Å <sup>3</sup> )                   | 985.29(8)                                      | 5400.6(4)                          | 2495.13(1)                                       | 1274.7(2)                                      | 1387.41(16)                                                   | 990.8(2)                                         |
| Z                                    | 2                                              | 8                                  | 4                                                | 2                                              | 2                                                             | 2                                                |
| d <sub>x</sub> (g cm <sup>-3</sup> ) | 1.39                                           | 1.15                               | 1.39                                             | 1.37                                           | 1.25                                                          | 1.38                                             |
| F(000)                               | 428                                            | 2000                               | 1088                                             | 556                                            | 556                                                           | 428                                              |
| μ(mm <sup>-1</sup> )                 | 0.198                                          | 0.132                              | 0.251                                            | 0.236                                          | 0.219                                                         | 0.197                                            |
| Θ range (°)                          | 3.27 –                                         | 3.38 –                             | 3.22 –                                           | 3.31 –                                         | 3.37 –                                                        | 3.64 –                                           |
| Reflections                          |                                                |                                    |                                                  |                                                |                                                               |                                                  |
| collected                            | 17923                                          | 14476                              | 18335                                            | 8392                                           | 16691                                                         | 6885                                             |
| unique                               | 3448                                           | 5216                               | 9637                                             | 4881                                           | 5328                                                          | 3461                                             |
| with                                 | 2844                                           | 4155                               | 7875                                             | 3446                                           | 4503                                                          | 1499                                             |
| R(F)                                 | 0.074                                          | 0.044                              | 0.041                                            | 0.085                                          | 0.059                                                         | 0.118                                            |
| wR(F <sup>2</sup> )                  | 0.212                                          | 0.103                              | 0.099                                            | 0.191                                          | 0.173                                                         | 0.306                                            |
| R(F) [all]                           | 0.084                                          | 0.061                              | 0.053                                            | 0.117                                          | 0.068                                                         | 0.222                                            |
| wR(F <sup>2</sup> ) [all]            | 0.220                                          | 0.114                              | 0.106                                            | 0.205                                          | 0.181                                                         | 0.366                                            |
| Goodness                             | 1.14                                           | 1.03                               | 1.04                                             | 1.02                                           | 1.08                                                          | 1.03                                             |
| max/min                              | 0.68/-0.32                                     | 0.14/-0.17                         | 0.55/-0.45                                       | 1.80/-1.03                                     | 0.70/-0.48                                                    | 0.71/-0.35                                       |

**Table 2.** Hydrogen bond data (Å, °) with s.u.'s in parentheses

| D          | H    | A                  | D-H     | H···A   | D···A      | D-H···A   |
|------------|------|--------------------|---------|---------|------------|-----------|
| <b>8a</b>  |      |                    |         |         |            |           |
| O10        | H10  | O2 <sup>i</sup>    | 0.82    | 1.85    | 2.665(4)   | 173       |
| <b>10a</b> |      |                    |         |         |            |           |
| O10        | H10  | O2 <sup>ii</sup>   | 0.82    | 1.95    | 2.764(3)=  | 175       |
| <b>23a</b> |      |                    |         |         |            |           |
| N10A       | H10A | O2A <sup>iii</sup> | 0.80(2) | 1.99(2) | 2.783(2)   | 175(2)    |
| N10B       | H10B | O2B <sup>iv</sup>  | 0.78(2) | 2.02(2) | 2.800(2)   | 173(2)    |
| N3         | H3N  | O11 <sup>iii</sup> | 0.87(2) | 2.32(2) | 3.1049(17) | 151.5(19) |
| C3         | H3   | O13                | 1.00    | 2.29    | 3.0590(19) | 133       |
| <b>34a</b> |      |                    |         |         |            |           |
| N10        | H10  | O2 <sup>v</sup>    | 0.88    | 1.94    | 2.801(6)   | 166       |
| <b>36a</b> |      |                    |         |         |            |           |
| N10        | H10  | O24 <sup>vi</sup>  | 0.86    | 2.12    | 2.956(3)   | 163       |
| <b>38</b>  |      |                    |         |         |            |           |



|     |     |                   |      |      |          |     |
|-----|-----|-------------------|------|------|----------|-----|
| N17 | H17 | O2 <sup>vii</sup> | 0.88 | 1.92 | 2.778(6) | 166 |
|     |     |                   |      |      |          |     |

Symmetry codes: <sup>i</sup> 1-x,1-y,-z; <sup>ii</sup> 3/2-y,1/2+x,1/4+z; <sup>iii</sup> 2-x,1-y,-z; <sup>iv</sup> -x,2-y,1-z; <sup>v</sup> 1-x,1-y,2-z; <sup>vi</sup> 1-x,-y,-z; <sup>vii</sup> 1-x,1-y,1-z.
